# Supplementary material for: High incidence of HIV and syphilis among migrant men who have sex with men in Beijing, China: a prospective cohort study
Source: PubMed Central journal article supplement — BMJ Open. 2014 Sep 16;4(9):e005351. doi: 10.1136/bmjopen-2014-005351 (PMC4166416; doi:10.1136/bmjopen-2014-005351), 2014-09-16
Supplement: bmjopen-2014-005351.draft_revisions.pdf [file bmjopen-2014-005351.draft_revisions.pdf]

# BMJ Open

## A Prospective Cohort Study among Migrant Men Who have Sex with Men in Beijing, China

|                                 |                                                                                                                                                                                                                                                                                                                                                                                                                                                                                                                                                                                                                                                                                                                                                                                                                                                                                                                                                                                                                                                             |
|---------------------------------|-------------------------------------------------------------------------------------------------------------------------------------------------------------------------------------------------------------------------------------------------------------------------------------------------------------------------------------------------------------------------------------------------------------------------------------------------------------------------------------------------------------------------------------------------------------------------------------------------------------------------------------------------------------------------------------------------------------------------------------------------------------------------------------------------------------------------------------------------------------------------------------------------------------------------------------------------------------------------------------------------------------------------------------------------------------|
| Journal:                        | <i>BMJ Open</i>                                                                                                                                                                                                                                                                                                                                                                                                                                                                                                                                                                                                                                                                                                                                                                                                                                                                                                                                                                                                                                             |
| Manuscript ID:                  | bmjopen-2014-005351                                                                                                                                                                                                                                                                                                                                                                                                                                                                                                                                                                                                                                                                                                                                                                                                                                                                                                                                                                                                                                         |
| Article Type:                   | Research                                                                                                                                                                                                                                                                                                                                                                                                                                                                                                                                                                                                                                                                                                                                                                                                                                                                                                                                                                                                                                                    |
| Date Submitted by the Author:   | 27-Mar-2014                                                                                                                                                                                                                                                                                                                                                                                                                                                                                                                                                                                                                                                                                                                                                                                                                                                                                                                                                                                                                                                 |
| Complete List of Authors:       | Mao, Hengyi; Nanjing Medical University, Department of Epidemiology & Biostatistics, School of Public Health<br>Ma, Wenzhe; Nanjing Medical University, Department of Epidemiology & Biostatistics, School of Public Health<br>Lu, Hongyan; Beijing Center for Disease Prevention and Control, Department of STDs/AIDS Prevention and Control<br>Wang, Lu; Chinese Center for Disease Control and Prevention, National Center for AIDS/STD Control and Prevention<br>Zheng, Hui; Nanjing Medical University, Department of Epidemiology & Biostatistics, School of Public Health<br>Zhu, Yingying; Nanjing Medical University, Department of Epidemiology & Biostatistics, School of Public Health<br>Peng, Zhihang; Nanjing Medical University, Department of Epidemiology & Biostatistics, School of Public Health<br>Yu, Rong-Bin; Nanjing Medical University, Department of Epidemiology & Biostatistics, School of Public Health<br>Wang, Ning; Chinese Center for Disease Control and Prevention, National Center for AIDS/STD Control and Prevention |
| <b>Primary Subject Heading</b>: | HIV/AIDS                                                                                                                                                                                                                                                                                                                                                                                                                                                                                                                                                                                                                                                                                                                                                                                                                                                                                                                                                                                                                                                    |
| Secondary Subject Heading:      | Epidemiology, Sexual health, Infectious diseases                                                                                                                                                                                                                                                                                                                                                                                                                                                                                                                                                                                                                                                                                                                                                                                                                                                                                                                                                                                                            |
| Keywords:                       | HIV & AIDS < INFECTIOUS DISEASES, Epidemiology < INFECTIOUS DISEASES, SEXUAL MEDICINE                                                                                                                                                                                                                                                                                                                                                                                                                                                                                                                                                                                                                                                                                                                                                                                                                                                                                                                                                                       |
|                                 |                                                                                                                                                                                                                                                                                                                                                                                                                                                                                                                                                                                                                                                                                                                                                                                                                                                                                                                                                                                                                                                             |

SCHOLARONE™  
Manuscripts

# A Prospective Cohort Study among Migrant Men Who have Sex with Men in Beijing, China

Hengyi Mao<sup>1#</sup>, Wenzhe Ma<sup>1#</sup>, Hongyan Lu<sup>2</sup>, Lu Wang<sup>3</sup>, Hui Zheng<sup>1</sup>, Yingying Zhu<sup>1</sup>, Zhihang Peng<sup>1\*</sup>,

Rongbin Yu<sup>1</sup>, Ning Wang<sup>3\*</sup>

1. Department of Epidemiology & Biostatistics, School of Public Health, Nanjing Medical University, Nanjing, China;
2. Department of STDs/AIDS Prevention and Control, Beijing Center for Disease Prevention and Control, Beijing, China;
3. National Center for AIDS/STD Control and Prevention, Chinese Center for Disease Control and Prevention, Beijing, China.

<sup>#</sup>These authors contributed equally to this work

<sup>\*</sup>Corresponding author

Postal address: 818th east Tianyuan Road, Nanjing, China;

E-mail: zhihangpeng@njmu.edu.cn; wangning\_12@126.com

Tel: 86-25-86868436;

Fax: 86-25-86868499.

**Keywords:** HIV; syphilis; male homosexuality; cohort study; China

**Word Count:** 3226

## ABSTRACT

**Objectives:** The purpose of the study was to investigate the incidence of HIV and syphilis and their related factors, as well as to examine the predictors associated with seroconversion among migrant men who have sex with men in Beijing, China.

**Design:** Prospective cohort study.

**Setting:** Yunnan, China.

**Participants:** 511 HIV-negative migrant MSM.

**Outcome measures:** HIV and syphilis incidence rates, factors associated with HIV/syphilis seroconversion and cohort retention.

**Results:** Of the 511 participants, 60.3% (308) and 52.4% (273) were retained at the four-month and eight-month follow-up visits, respectively. The HIV and syphilis incidence rates were 7.83 (95% CI 4.48 to 12.72) and 11.11 (95% CI 6.47 to 17.80) cases per 100 person-years, respectively. HIV seroconversion was significantly associated with having first anal intercourse at 15 or younger (adjusted hazard ratio (aHR) = 9.20, 95% CI 1.94 to 43.56) and ever had group sex (aHR = 4.30, 95% CI 1.40 to 13.18). Bisexual orientation (aHR = 5.09, 95% CI 1.02 to 25.57) was negatively associated with syphilis seroconversion. Predictors associated with both four-month and eight-month retention rates included age  $\geq$  25 years old and living in Beijing for more than one year.

**Conclusions:** The high incidence of HIV and syphilis among migrant MSM are cause for concern. A comprehensive strategy should be implemented to maintain a higher retention rate among migrant MSM.

### Strengths and limitations of this study

- First cohort study to assess incidence of HIV and syphilis among migrant MSM in Beijing.
- Cox regression analysis and stepwise multiple logistic regression were used to identify factors associated with

1  
2  
3 HIV/syphilis seroconversion and cohort retention, respectively.

- 4 ● Retention rates were relatively low, which means that the estimates of HIV/syphilis seroconversions may be biased
- 5 because no evidence showed a balance between those retained in the study and those lost to follow-up.
- 6
- 7 ● Sampling methods may have led to selection bias.
- 8
- 9 ● No outflow population was included, and the proportions of migrants from different provinces varied, which lead
- 10 to difficulty of generalization of the data.
- 11
- 12
- 13
- 14
- 15
- 16
- 17
- 18
- 19

## 20 INTRODUCTION

21  
22 In China, sexual transmission has become the major route for HIV transmission in the last decade.<sup>[1]</sup> As an increasing  
23 proportion of people living with HIV/AIDS (PLWHA), cases attributed to MSM transmission rose from 7.3% in 2005  
24 to 11% in 2007. The 2011 HIV epidemic assessment report showed that among the estimated 780,000 people living  
25 with HIV/AIDS, homosexual contact accounted for 17.4% of infections, with an increase from 14.7% in 2009.<sup>[2]</sup> A  
26 growing number of studies have revealed the upward trend of HIV prevalence among MSM in different parts of China.  
27 For example, the prevalence increased from 10.4% in 2006 to 12.5% in 2007 in Chongqing,<sup>[3]</sup> from 0.4% in 2004 to  
28 5.8% in 2006 in Beijing,<sup>[4]</sup> and from 5.7% in 2007 and 6.2% in 2008 to 8.1% in 2009 in Shenyang.<sup>[5]</sup>

29  
30 In recent years, there is growing awareness that internal migration within China may be shifting the HIV epidemic by  
31 broadening social and sexual mixing.<sup>[1]</sup> Data from national behavioral surveillance during 2004-2005 showed that  
32 migrant HIV/AIDS cases accounted for more than 50% of total infections in nine different provinces.<sup>[6]</sup> Moreover,  
33 studies implemented among MSM in metropolises also revealed a high proportion of migrants among MSM, such as in  
34 Beijing (88%),<sup>[7]</sup> Chongqing (80.3%)<sup>3</sup> and Shanghai (79.7%).<sup>[8]</sup> Although migration itself does not spread HIV and  
35 other sexually transmitted diseases (STD), it may increase the possibility of infection when combined with high risk  
36 behaviors, which are prevalent among MSM. It has been confirmed in numerous studies that high risk behaviors such  
37  
38  
39  
40  
41  
42  
43  
44  
45  
46  
47  
48  
49  
50  
51  
52  
53  
54  
55  
56  
57  
58  
59  
60

1  
2  
3 as unprotected anal sex, commercial sex, group sex, casual sex and having multiple sexual partners were prevalent  
4  
5 among MSM in China.<sup>[9-11]</sup> On the other hand, perceived stigma and discrimination due to traditional Chinese culture  
6  
7 and conservative social values have increasingly led Chinese MSM to disguise their sexual orientation with matrimony,  
8  
9 which leads to a potential risk of transmitting HIV to the general population via heterosexual transmission.<sup>[10]</sup> As for  
10  
11 migrants, without the stability of family or a home community and with low educational levels, limited knowledge  
12  
13 about HIV/AIDS prevention, and discrimination and marginalization from the mainstream metropolitan society, high  
14  
15 risk behaviors may happen more frequently.<sup>[12, 13]</sup> Furthermore, due to China's household registration system and urban  
16  
17 social security system, migrants have limited access to comprehensive, convenient and long-term health services.<sup>[14]</sup>  
18  
19  
20 Recently, some cross-sectional studies in China demonstrated that compared to local MSM, migrant MSM engage in  
21  
22 more high risk sexual behaviors such as multiple sexual partners, higher frequencies of anal and oral intercourse, and  
23  
24 unprotected sexual behaviors with males and females.<sup>[11, 15]</sup> As a marginal and vulnerable subpopulation, migrant MSM  
25  
26 should be accorded a high level of consideration by researchers.  
27  
28  
29  
30  
31

32  
33 Beijing, the capital of China and a center of political, economic and cultural activity, is a magnet for the migrant  
34  
35 population. In 2009, Beijing's metropolitan population included some 72.6 million migrants, and the migrant  
36  
37 population accounted for 70% of the population increase from 2006 to 2009 (China National Bureau of Statistics, 2009).  
38  
39 According to statistics from the Beijing Municipal Bureau of Health, 4722 (73.98%) HIV/AIDS cases from the  
40  
41 cumulative data were from domestic provinces, and 44% of the 501 new HIV/AIDS cases in the first five months of  
42  
43 2009 were among male homosexuals.<sup>[16]</sup> In addition, prior research among MSM in Beijing revealed that with the  
44  
45 increasing epidemic of HIV among MSM in recent years, the number of migrants among recruited participants also  
46  
47 showed a remarkable upward trend.<sup>[4, 7]</sup> This phenomenon implies that: 1) migrant MSM play a main role in the MSM  
48  
49 sphere in Beijing, 2) this marginal population emerged gradually with the constant improvement of sampling methods,  
50  
51 and 3) more targeted studies of this subpopulation are urgently needed, while at present only a few cross-sectional  
52  
53  
54  
55  
56  
57  
58  
59  
60

1  
2 studies have been conducted to investigate its HIV/STD infections and relative risk factors.<sup>[17, 18]</sup> Thus, the purpose of  
3  
4  
5 this research was to assess the incidence of HIV and syphilis and examine the predictors associated with seroconversion  
6  
7  
8 and retention in a prospective cohort study among migrant MSM in Beijing, China.  
9

## 10 11 12 **METHODS**

### 13 14 **Study Design and Study Population**

15  
16  
17 This prospective cohort study was conducted in Beijing, the capital of China. Participants were recruited through three  
18  
19  
20 methods. First, study participants were recruited directly through website advertisements by a nongovernmental AIDS  
21  
22  
23 volunteer group (<http://www.hivolunt.net>). Second, peer recruiters were hired and trained to distribute flyers with  
24  
25  
26 study-related information at MSM-frequented venues (e.g., MSM clubs, bars, parks and bathhouses). Thirdly, study  
27  
28  
29 participants were encouraged to refer their peers to enroll in the study. Once a potential participant had been referred or  
30  
31  
32 identified, local research team members approached the individual to verify eligibility, which included age  $\geq 18$  years  
33  
34  
35 old, male individual, HIV-negative, had sex with another male in the past 12 months, lacked permanent household  
36  
37  
38 registration in Beijing and provided written informed consent. A total of 547 participants were screened during the  
39  
40  
41 baseline screening survey from September to October 2009, of whom 36 were HIV-positive. Thus a total of 511 eligible  
42  
43  
44 and consenting MSM were enrolled into the prospective cohort. Participants were followed up for four and eight  
45  
46  
47 months after the baseline survey. At each study visit (baseline, four-month follow-up and eight-month follow-up),  
48  
49  
50 eligible participants were interviewed by trained health professionals in a private room of the study clinic, and blood  
51  
52  
53 plasma specimens were collected and analyzed for HIV and syphilis antibodies by experienced physicians. One week  
54  
55  
56 later, each participant received their test results anonymously by a private identification code. All participants who  
57  
58  
59 tested positive for HIV/syphilis received additional posttest counseling and referrals to relevant free services. Every  
60  
61  
62 participant received 50 RMB (7.4 USD), 12 free condoms and one free lubricant after each completed study visit.

1  
2  
3 Every participant was asked to provide at least two different and current contact sources, and reminder calls were made  
4  
5 before the follow-up day to verify that the exact time of the visit would be convenient for them. The study protocol and  
6  
7 informed consent forms were approved by the Institutional Review Boards of the National Center for AIDS/STD  
8  
9 Control and Prevention of the China Center for Disease Control and Prevention.  
10  
11

### 12 13 14 15 **Data Collection and Laboratory Tests** 16

17  
18 Questionnaire-based interviews were conducted on a one-on-one basis in a separate private room of the district clinic.  
19  
20 Data on demographics, sexual behavior and history of sexually transmitted diseases (STDs) were collected.  
21  
22 Participants' questionnaires and blood specimens were linked through assignment of a unique identifier code in the  
23  
24 follow-up visits.  
25  
26

27  
28 Blood specimens were tested for HIV and syphilis infections. The HIV infection status was screened by an ELISA  
29  
30 (InTec Products Company, Xiamen, China) screening, and confirmed by a HIV-1/2 Western Blot (HIV Blot 2.2 WBTM,  
31  
32 Genelabs Diagnostics, Singapore). Syphilis infection was determined by a rapid plasma reagin (RPR) test (Shanghai  
33  
34 Rongsheng, Shanghai, China), and confirmed using *Treponema pallidum* particle assay (TPPA) test (Fujirebio Inc,  
35  
36 Tokyo, Japan).  
37  
38  
39  
40  
41  
42

### 43 **Statistical Analysis** 44

45  
46 Questionnaire data were double-entered and then checked for accuracy using Epi Data software (The Epi Data  
47  
48 Association Odense, Denmark, version 3.1). Data were analyzed using Stata/SE (StataCorp LP, USA, version 12.0 for  
49  
50 Windows). HIV seroconversion was estimated to have occurred at the midpoint between the time of baseline HIV test  
51  
52 and the time of the follow-up HIV test with a seropositive result. Syphilis seroconversion was estimated to have  
53  
54 occurred at the midpoint between the time of a confirmed seronegative and the time of a confirmed seropositive.  
55  
56  
57  
58  
59  
60

1  
2  
3 HIV/syphilis incidence density was calculated based on a Poisson distribution, with number of seroconversions within  
4  
5 the follow-up period as the numerator and person-years (PY) over the entire follow-up period as the denominator.  
6  
7  
8 Categorical factors associated with retention rate were analyzed by univariate logistic regression, including baseline  
9  
10 demographic and behavioral characteristics. A stepwise multiple logistic regression (out 0.05, in 0.02) was used to  
11  
12 select independent factors for the retention rate. A Cox regression model was used in univariate and multiple regression  
13  
14 analyses to identify correlates of time to HIV seroconversion. Statistically significant variables in univariate analysis  
15  
16 were entered simultaneously into a multivariate Cox proportional hazard regression model to determine the adjusted  
17  
18 hazard ratio (aHR) for HIV/syphilis seroconversion-related risk factors.  
19  
20  
21  
22  
23  
24

## 25 RESULTS

### 26 Baseline Characteristics of the Participants

27  
28  
29 A total of 547 participants were screened at baseline; 36 (6.58%) were HIV antibody seropositive and syphilis  
30  
31 prevalence was 29.62%. Finally, 511 participants were HIV seronegative and eligible to continue the study. Of them,  
32  
33 27.59% were syphilis seropositive.  
34  
35  
36

37  
38 Of 511 participants, the median age was 29 years; 94.32% belonged to the Han ethnic group; 64.77% were single,  
39  
40 22.90% were married or cohabiting, and 12.33% were separated or divorced or widowed. For education level, 73.19%  
41  
42 had received a high school education or lower. About half (54.01%) had monthly incomes < 300US\$. Participants who  
43  
44 identified themselves as exclusively homosexual or bisexual accounted for 60.67% and 37.57%, respectively. A total of  
45  
46 16.05% and 44.03% of the participants thought it was impossible or improbable they would be infected with HIV,  
47  
48 respectively. The median age of sexual debut was 20 years, and 58.71% experienced their sexual debut with a male.  
49  
50  
51 The median age of first anal intercourse was 22, and 58.65% of them did not use a condom at first anal intercourse. In  
52  
53 the past year, 78.67% of the participants had ever received condoms, 65.17% had ever received lubricant, 23.68% had  
54  
55  
56  
57  
58  
59  
60



ever taken part in peer education, 18.40% had ever received examination or treatment for STDs and 52.49% had ever received voluntary counseling and testing services (VCTs).

Regarding behaviors in the past six months among participants, the median number of male sex partners was three. For high risk behaviors, 327 (63.99%) had oral sex with male sex partners, 22 (6.73%) of them had consistent condom use with regular sex partners, and 26 (7.95%) with casual partners; 511 (100%) had anal sex with male sex partners, 13.11% of them had consistent condom use with regular sex partners, and 66 (18.70%) with casual partners. A total of 61 (11.94%) participants had ever engaged in commercial sexual behavior, among whom 35 (57.38%) had paid for sex and 43 (70.49%) received money. A total of 59 (11.55%) had ever engaged in group sex, which happened almost exclusively (96.61%) among males. A total of 166 (32.49%) had ever engaged in sex under the influence of alcohol, among whom 152 (92.77%) had homosexual intercourse while intoxicated (table 1).

**Table 1 Sociodemographic characteristics of the 547 study participants in the cohort of migrant MSM in Beijing**

| Variables                                  | n   | %     |
|--------------------------------------------|-----|-------|
| Overall, N                                 | 547 | 100   |
| Age (median, years)                        | 29  | -     |
| 18-24                                      | 149 | 29.16 |
| ≥25                                        | 362 | 70.84 |
| Ethnicity                                  |     |       |
| Han                                        | 482 | 94.32 |
| Minority                                   | 29  | 5.68  |
| Marital status                             |     |       |
| Single                                     | 331 | 64.77 |
| Married                                    | 114 | 22.31 |
| Cohabiting with male or female sex partner | 3   | 0.59  |
| Separated or divorced or widowed           | 63  | 12.33 |
| Duration of stay in Beijing                |     |       |
| < 1 year                                   | 173 | 33.85 |
| ≥ 1 year                                   | 338 | 66.14 |
| Education level                            |     |       |
| High school and below                      | 374 | 73.19 |
| College and above                          | 137 | 26.81 |
| Monthly income (US\$)                      |     |       |
| < 300                                      | 276 | 54.01 |

|    |                                                                                  |     |       |
|----|----------------------------------------------------------------------------------|-----|-------|
| 1  |                                                                                  |     |       |
| 2  | ≥ 300                                                                            | 235 | 45.99 |
| 3  | Self-reported sexual orientation                                                 |     |       |
| 4  | Homosexual                                                                       | 310 | 60.67 |
| 5  | Heterosexual                                                                     | 8   | 1.57  |
| 6  | Bisexual                                                                         | 192 | 37.57 |
| 7  | Other                                                                            | 1   | 0.2   |
| 8  |                                                                                  |     |       |
| 9  | Self-reported risk of HIV infection                                              |     |       |
| 10 | Impossible                                                                       | 82  | 16.05 |
| 11 | Improbable                                                                       | 225 | 44.03 |
| 12 | Possible                                                                         | 74  | 14.48 |
| 13 | Probable                                                                         | 15  | 2.94  |
| 14 | No idea                                                                          | 115 | 22.5  |
| 15 |                                                                                  |     |       |
| 16 | Age of sexual debut (median,years)                                               | 20  |       |
| 17 |                                                                                  |     |       |
| 18 | Gender of first sexual partner                                                   |     |       |
| 19 | Male                                                                             | 300 | 58.71 |
| 20 | Female                                                                           | 211 | 41.29 |
| 21 |                                                                                  |     |       |
| 22 | Age of first anal intercourse(median, years)                                     | 22  |       |
| 23 |                                                                                  |     |       |
| 24 | Number of male sex partners in the last 6 months (median)                        | 3   |       |
| 25 | Number of female sex partners in the last 6 months (median)                      | 0   |       |
| 26 | Oral sex with regular partners with a consistent condom use in the past 6 months | 22  | 6.73  |
| 27 | Oral sex with casual partners with a consistent condom use in the past 6 months  | 26  | 7.95  |
| 28 | Anal sex with regular partners with a consistent condom use in the past 6 months | 67  | 13.11 |
| 29 | Anal sex with casual partners with a consistent condom use in the past 6 months  | 66  | 18.7  |
| 30 | Ever had commercial sexual behavior                                              | 61  | 11.94 |
| 31 | Ever had group sex                                                               | 59  | 11.55 |
| 32 | Alcohol use prior to sex                                                         | 166 | 32.49 |
| 33 | Have ever received condoms                                                       | 402 | 78.67 |
| 34 | Have ever received lubricant                                                     | 333 | 65.17 |
| 35 | Have ever received peer education                                                | 121 | 23.68 |
| 36 | Have ever received examination or treatment for STD                              | 94  | 18.4  |
| 37 | Have ever received voluntary counseling and testing (VCT) services               | 268 | 52.45 |
| 38 | Have ever received educational materials on AIDS/STD                             | 302 | 59.1  |
| 39 |                                                                                  |     |       |
| 40 |                                                                                  |     |       |
| 41 |                                                                                  |     |       |
| 42 |                                                                                  |     |       |
| 43 | MSM, men who have sex with men; STD, sexually transmitted disease.               |     |       |
| 44 |                                                                                  |     |       |
| 45 |                                                                                  |     |       |
| 46 |                                                                                  |     |       |
| 47 |                                                                                  |     |       |
| 48 |                                                                                  |     |       |
| 49 |                                                                                  |     |       |
| 50 |                                                                                  |     |       |
| 51 |                                                                                  |     |       |
| 52 |                                                                                  |     |       |
| 53 |                                                                                  |     |       |
| 54 |                                                                                  |     |       |
| 55 |                                                                                  |     |       |
| 56 |                                                                                  |     |       |
| 57 |                                                                                  |     |       |
| 58 |                                                                                  |     |       |
| 59 |                                                                                  |     |       |
| 60 |                                                                                  |     |       |

### Incidence of infections of HIV, syphilis and factors predicting HIV and syphilis seroconversion

During the eight-month follow-up, 16 HIV seroconversions were observed over 204.27 person-years of observation, resulting in an incidence rate of 7.83 per 100 person-years (PY) (95% CI 4.48 to 12.72). At the four-month visit, the incidence of HIV was 8.33 per 100 PY (95% CI 3.81 to 15.81) and at the eight-month visit it was 3.83 per 100 PY (95% CI 1.54 to 7.89). During the eight-month follow-up period, syphilis incidence was 11.11 per 100 PY (95% CI

6.47 to 17.80). At the four-month and eight-month visits, the syphilis incidence was 10.03 per 100 PY (95% CI 4.33 to 19.76) and 15.25 per 100 PY (95% CI 6.97 to 28.94), respectively (table 2).

**Table 2. Univariate and multivariate analyses of participant characteristics associated with incident HIV infection among migrant MSM in Beijing.**

| Factors                                      | No. of HIV seroconversions | Cumulative PY | HIV incidence (/100PY) | Univariate          |         | Multivariate         |         |
|----------------------------------------------|----------------------------|---------------|------------------------|---------------------|---------|----------------------|---------|
|                                              |                            |               |                        | HR (95% CI)         | p Value | Adjusted HR (95% CI) | p Value |
| Total                                        | 16                         | 204.27        | 7.83                   |                     |         |                      |         |
| Education                                    |                            |               |                        |                     |         |                      |         |
| Junior college and below                     | 13                         | 143.95        | 9.03                   | 1.00                |         |                      |         |
| Above junior college                         | 3                          | 60.32         | 4.97                   | 0.56(0.16 to 1.98)  | 0.370   |                      |         |
| Seeking partner through Internet             |                            |               |                        |                     |         |                      |         |
| NO                                           | 12                         | 109.45        | 10.96                  | 1.00                |         |                      |         |
| YES                                          | 4                          | 94.81         | 4.22                   | 0.39(0.12 to 1.20)  | 0.100   |                      |         |
| Age of first anal intercourse (median,years) |                            |               |                        |                     |         |                      |         |
| ≥15                                          | 14                         | 200.99        | 6.97                   | 1.00                |         | 1.00                 |         |
| <15                                          | 2                          | 3.28          | 60.98                  | 8.28(1.88 to 36.46) | 0.005   | 9.20(1.94 to 43.56)  | 0.005   |
| Ever had group sex                           |                            |               |                        |                     |         |                      |         |
| NO                                           | 11                         | 183.48        | 6                      | 1.00                |         | 1.00                 |         |
| YES                                          | 5                          | 20.78         | 24.06                  | 3.95(1.37 to 11.38) | 0.011   | 4.30(1.40 to 13.18)  | 0.011   |
| Knowledge of HIV/AIDS was acquired from      |                            |               |                        |                     |         |                      |         |
| Media                                        |                            |               |                        |                     |         |                      |         |
| NO                                           | 12                         | 109.65        | 10.94                  | 1.00                |         |                      |         |
| YES                                          | 4                          | 94.62         | 4.23                   | 0.39(0.12 to 1.20)  | 0.100   |                      |         |
| Internet                                     |                            |               |                        |                     |         |                      |         |
| NO                                           | 6                          | 108.59        | 5.53                   | 1.00                |         |                      |         |
| YES                                          | 10                         | 95.68         | 10.45                  | 0.38(0.12 to 1.19)  | 0.097   |                      |         |

PY, person-years; HR, hazard ratio.

Multivariate Cox regression analyses indicated that age  $\leq$  15 years old at first anal intercourse (adjusted hazard ratio (aHR) = 9.20, 95% CI 1.94 to 43.56,  $p=0.050$ ) and ever had group sex (aHR=4.30, 95% CI 1.40 to 13.18,  $p=0.011$ ) were significantly associated with time to HIV seroconversion. For syphilis incidence, bisexual orientation (aHR=5.09, 95% CI 1.02 to 25.57,  $p=0.048$ ) was significantly identified as a risk factor (table 3).

**Table 3. Univariate and multivariate analyses of participant characteristics associated with incident syphilis infection among migrant MSM in Beijing.**

| Factors                                                     | No. of syphilis seroconversions | Cumulative PY | Syphilis incidence (/100PY) | Univariate          |         | Multivariate         |         |
|-------------------------------------------------------------|---------------------------------|---------------|-----------------------------|---------------------|---------|----------------------|---------|
|                                                             |                                 |               |                             | HR (95% CI)         | p Value | Adjusted HR (95% CI) | p Value |
| Self-reported sexual orientation                            |                                 |               |                             |                     |         |                      |         |
| Homosexual                                                  | 9                               | 96.89         | 9.29                        | 1.00                |         |                      |         |
| Heterosexual                                                | 0                               | 1.42          | 0                           | -                   |         |                      |         |
| Bisexual                                                    | 8                               | 54.64         | 14.64                       | 5.56(1.10 to 27.05) | 0.038   | 5.09(1.02 to 25.57)  | 0.048   |
| Other                                                       | 0                               | 0             | -                           | -                   |         |                      |         |
| Number of female sex partners in the last 6 months (median) |                                 |               |                             |                     |         |                      |         |
| 0                                                           | 16                              | 149.9         | 10.67                       | 1.00                |         |                      |         |
| ≥2                                                          | 1                               | 3.05          | 32.79                       | 9.22(1.13 to 75.37) | 0.038   |                      |         |
| Seeking partners in bar/dancing hall/tearoom/chamber        |                                 |               |                             |                     |         |                      |         |
| NO                                                          | 11                              | 129.41        | 8.5                         | 1.00                |         |                      |         |
| YES                                                         | 6                               | 23.55         | 25.48                       | 3.12(0.75 to 13.07) | 0.119   |                      |         |

### Predictors of cohort retention

Of the 511 participants, 60.3% (308) were retained in the cohort at the four-month follow-up and 52.4% (273) were retained at the eight-month follow-up.

Univariate factors among baseline characteristics which were significantly associated with four-month retention were analysed with stepwise multiple logistic regression. Four factors were kept in the final model, including age > 25 years old (adjusted odds ratio (AOR) = 1.81, 95% CI 1.07 to 3.06,  $p = 0.026$ ), living in Beijing for more than one year (AOR = 3.68, 95% CI 2.04 to 6.64,  $p < 0.001$ ), had at least one female sex partners in the last six months (AOR = 0.48, 95% CI 0.29 to 0.80,  $p = 0.005$ ), and had ever received VCTs in the past 12 months (AOR = 1.71, 95% CI 1.07 to 2.72,  $p < 0.024$ ) (table 4).

**Table 4. Factors Associated With Four-Month Retention Rate in a Cohort Study of migrant MSM in Beijing, China, using stepwise multiple logistic analysis.**

| Factor | N | Retention rate % (n) | OR (95% CI) | p Value | Adjusted OR (95% CI) | p Value |
|--------|---|----------------------|-------------|---------|----------------------|---------|
|--------|---|----------------------|-------------|---------|----------------------|---------|

|                                                                                    |     |             |                    |        |                     |  |        |
|------------------------------------------------------------------------------------|-----|-------------|--------------------|--------|---------------------|--|--------|
| Age                                                                                |     |             |                    |        |                     |  |        |
| 18-24                                                                              | 149 | 46.98(70)   | 1.00               |        | 1.00                |  |        |
| ≥25                                                                                | 362 | 65.75(238)  | 2.17(1.47 to 3.19) | <0.001 | 1.81(1.07 to 3.06)  |  | 0.026  |
| Duration of stay in Beijing                                                        |     |             |                    |        |                     |  |        |
| < 1 year                                                                           | 95  | 34.74(33)   | 1.00               |        | 1.00                |  |        |
| ≥ 1 year                                                                           | 416 | 66.27(208)  | 3.66(2.29 to 5.85) | <0.001 | 3.68 (2.04 to 6.64) |  | <0.001 |
| Number of female sex partners in the last 6 months                                 |     |             |                    |        |                     |  |        |
| 0                                                                                  | 382 | 64.66 (247) | 1.00               |        | 1.00                |  |        |
| ≥1                                                                                 | 129 | 47.29 (61)  | 0.49(0.33 to 0.74) | 0.001  | 0.48(0.29 to 0.80)  |  | 0.005  |
| Have received voluntary counseling and testing (VCT) service in the past 12 months |     |             |                    |        |                     |  |        |
| No                                                                                 | 243 | 51.85 (126) | 1.00               |        | 1.00                |  |        |
| Yes                                                                                | 268 | 67.91 (182) | 1.97(1.37 to 2.81) | <0.001 | 1.71(1.07 to 2.72)  |  | 0.024  |

For eight-month retention, age > 25 years old (AOR = 1.76, 95% CI 1.16 to 2.68, p = 0.008), living in Beijing for more than one year (AOR = 1.68, 95% CI 1.03 to 2.73, p = 0.039), first sexual partner was female (AOR = 0.60, 95% CI 0.41 to 0.88, p = 0.009), ever had group sex (AOR = 0.50, 95% CI 0.28 to 0.89, p = 0.019), and had received lubricant in the past 12 months (AOR = 2.31, 95% CI 1.56 to 3.42, p < 0.001 ) were retained in the final model using stepwise multiple logistic regression analysis (table 5).

**Table 5. Factors Associated With Eight-Month Retention Rate in a Cohort Study of migrant MSM in Beijing, China, using stepwise multiple logistic analysis.**

| Factor                                        | N   | Retention rate % (n) | OR (95% CI)        | p Value | Adjusted OR (95% CI) | p Value |
|-----------------------------------------------|-----|----------------------|--------------------|---------|----------------------|---------|
| Age                                           |     |                      |                    |         |                      |         |
| 18-24                                         | 149 | 44.30(66)            | 1.00               |         | 1.00                 |         |
| ≥25                                           | 362 | 57.18(207)           | 1.68(1.14 to 2.47) | 0.008   | 1.76(1.16 to 2.68)   | 0.008   |
| Duration of stay in Beijing                   |     |                      |                    |         |                      |         |
| < 1 year                                      | 78  | 48.72 (38)           | 1.00               |         | 1.00                 |         |
| > 1 year                                      | 338 | 58.88 (199)          | 2.17(1.37 to 3.43) | <0.001  | 1.68 (1.03 to 2.73)  | 0.039   |
| Gender of the first sexual partner            |     |                      |                    |         |                      |         |
| Male                                          | 300 | 58.33 (175)          | 1.00               |         | 1.00                 |         |
| Female                                        | 211 | 46.45 (98)           | 0.62(0.43 to 0.88) | 0.008   | 0.60 (0.41 to 0.88)  | 0.009   |
| Ever had group sex                            |     |                      |                    |         |                      |         |
| NO                                            | 452 | 54.87 (248)          | 1.00               |         | 1.00                 |         |
| YES                                           | 59  | 42.37 (25)           | 0.61(0.35 to 1.05) | 0.072   | 0.50 (0.28 to 0.89)  | 0.019   |
| Have received lubricant in the past 12 months |     |                      |                    |         |                      |         |
| NO                                            | 109 | 34.86 (38)           | 1.00               |         | 1.00                 |         |

|     |     |             |                    |        |                     |        |
|-----|-----|-------------|--------------------|--------|---------------------|--------|
| YES | 402 | 58.46 (235) | 2.59(1.78 to 3.77) | <0.001 | 2.31 (1.56 to 3.42) | <0.001 |
|-----|-----|-------------|--------------------|--------|---------------------|--------|

## DISCUSSION

Our study found that the prevalence of HIV (6.58%) among migrant MSM was at a high epidemic level, which was highlighted in comparison to that of the migrant population (0%) in Beijing.<sup>[19]</sup> Additionally, it was higher than the 4.8% in 2007 among general MSM in Beijing.<sup>[20]</sup> Although it was lower than 8.0% in 2009, the proportion of the migrant population was also as high as 88%.<sup>[7]</sup> A similar result (5.9%) was found in a recent cross-sectional study among migrant MSM.<sup>[17]</sup> Incidence in this subgroup (7.83/100PY) was consistent with that of migrant MSM (8.51/100PY) in a MSM cohort study in Beijing, and higher than the incidence of permanent resident MSM.<sup>[21]</sup> It was also higher than the incidence of general MSM in different parts of China.<sup>[22, 23]</sup>

The study found that participants whose first anal intercourse occurred before age 15 had significantly higher risk for HIV seroconversion. An American study of young minority MSM found that study participants who had an MSM sexual debut before 16 years old were more likely to have psychological problems and high risk behaviors like exchanging sex and drug use.<sup>[24]</sup> Early sexual debut would have a deep and long-term influence on an individual's developing sexual concept, but appropriate sex-education has generally been shunned in traditional Chinese education. Our study indicated that early sex-education should target young people to delay the age of first sexual activity. Another risk factor significantly associated with HIV incidence was ever had group sex. An explanation of this observation is that psychological stress caused by stigma and discrimination hinders the development of longer-term relationships between MSM,<sup>[25]</sup> and having sex with multiple sex partners increases the chance of HIV transmission. This indicates a need for confidentiality and support services for migrant MSM. Serious attention should be paid to the prevalence of STDs. The prevalence rate of syphilis (29.62%) was higher than those of previous studies conducted among MSM in Beijing, such as 19.8% in 2007,<sup>[20]</sup> and 22.0% in 2009.<sup>[7]</sup> It was also higher than those of MSM from many other

1  
2  
3 provinces.<sup>[23,26]</sup> The incidence of syphilis (11.11/100PY) was also at an extremely high level compare to 8.06/100PY in  
4  
5 a cohort study among MSM during the same period in 2009.<sup>[21]</sup> High prevalence of syphilis among MSM was a  
6  
7 common risk factor for encouraging HIV infection because of the biological and behavioral links between syphilis and  
8  
9 HIV.<sup>[27]</sup> The multiple analyses significantly revealed self-identified bisexuals were five times more likely than  
10  
11 homosexuals to be infected with syphilis. One major reason for this outcome could be that bisexuals may have more  
12  
13 varied sexual behaviors with a wider range of sexual partners, including males and females. In addition, a  
14  
15 cross-sectional study among young migrant MSM in Beijing discovered that MSM who were engaged in bisexual  
16  
17 behavior had a higher rate of unprotected sex with stable female partners and were less likely to take part in prevention  
18  
19 behaviors,<sup>[18]</sup> which was consistent with our finding that those who had at least one female sex partner and those whose  
20  
21 first sexual partner was female were significantly more likely to be lost at four-month and eight-month follow-up visits  
22  
23 respectively. Moreover, only 18.4% of the participants received examination or treatment for sexually transmitted  
24  
25 diseases in the past 12 months, which may be caused by the high cost of health services and low coverage of health  
26  
27 insurance for the migrant population.<sup>[14]</sup> Low risk-awareness might be another reason for their lower access to  
28  
29 HIV/STD test and treatment. All of these emphasize an urgent need for widespread and accurate syphilis screening and  
30  
31 affordable treatment for migrant MSM in Beijing.  
32  
33  
34  
35  
36  
37  
38  
39

40  
41 In our study, the retention rate was lower than in previous cohort studies implemented among general MSM in Beijing  
42  
43 (86.2% in 2007, 86.8% in 2009).<sup>[21, 22]</sup> From the multiple analyses, participants who were less than 25 years old were  
44  
45 more likely to be lost at both four-month and eight-month follow-up visits. Similar problems have occurred among  
46  
47 studies of young MSM in the US.<sup>[28]</sup> A plausible reason for this observation was that many young people in China have  
48  
49 poor knowledge of safe sexual behaviors. Traditional interventions are more pragmatic but less attractive and  
50  
51 appropriate for young people. A qualitative investigation implemented among young MSM in Milwaukee and Detroit  
52  
53 offered some new approaches, such as that HIV prevention efforts should be embedded in the context of broader life  
54  
55  
56  
57  
58  
59  
60

1  
2 and relationship issues facing young MSM.<sup>[29]</sup> As differences almost certainly exist between young Chinese and  
3  
4 American MSM, predictors of retention among young MSM in Beijing deserve further discussion.  
5  
6

7  
8 As for positive predictors, we found those who had been in Beijing for more than one year or who had received  
9  
10 condoms or lubricant were more likely to be maintained in this cohort. A similar result was discovered in Yangzhou.<sup>[30]</sup>  
11  
12 Migrant MSM who stay longer in Beijing may have more chances to receive effective and stable intervention services,  
13  
14 and their potential impact on increasing awareness of self-protection would encourage them to pay closer attention to  
15  
16 advances in research. As a result, migrants may be more likely to remain with the investigation to show their support.  
17  
18 From the results of our study, the coverage of intervention on this population was limited. Aimed at the mobility  
19  
20 problem inherent to migrant populations, a specific strategy of intervention aimed at migrant MSM is imminently  
21  
22 needed.  
23  
24  
25  
26

27  
28 This study has a number of limitations. Firstly, retention rates were relatively low, which means that the estimates of  
29  
30 HIV/syphilis seroconversions may be biased because no evidence showed a balance between participants retained in  
31  
32 the study and those lost to follow-up. Secondly, using non-random sampling methods may have led to selection bias.  
33  
34 Thirdly, the sample size was insufficient, and some potential relevant factors may be concealed by the small sample  
35  
36 size. Lastly, the study subjects were all inflow population and did not include outflow population, and the proportion of  
37  
38 migrants from different provinces varied. There is no evidence to show the data could be generalized to other regions.  
39  
40  
41  
42

43  
44 In conclusion, this is the first cohort study to assess incidence of HIV and syphilis among migrant MSM in Beijing.  
45  
46 With highly prevalent risk behaviors, the migrant MSM had a high level of HIV incidence, and the epidemic of syphilis  
47  
48 among this subgroup was extremely serious. Bisexual MSM were at a high risk of syphilis seroconversion, and were  
49  
50 more concealed among migrant MSM. Future prevention efforts should include screening and appropriate treatment for  
51  
52 syphilis. Multiple modes of intervention services need to be improved and implement for this marginalised group. A  
53  
54 greater understanding of risk behaviors and the HIV/STD epidemic among migrant MSM needs to be investigated in  
55  
56  
57  
58  
59  
60



1  
2  
3 the future.  
4  
5  
6

## 7 8 **ACKNOWLEDGEMENT** 9

10 This work was supported in part by Natural Science Foundation of China (81001288, 11171268), National S&T Major  
11 Project Foundation of China (No. 2012ZX10001-001 and No. 2011ZX10004-902), Priority Academic Program  
12 Development of Jiangsu Higher Education Institutions (PAPD).  
13  
14

15  
16  
17 The funders had no role in study design, data collection and analysis, decision to publish, or preparation of the  
18 manuscript.  
19  
20  
21

## 22 23 24 25 **CONTRIBUTORS** 26

27  
28 ZP, RY and NW conceived and designed the experiments, HL and LW performed the experiments, HM and WM  
29 analyzed the data, HZ and YZ contributed reagents/materials/analysis tools, HM, WM and ZP wrote the paper, all  
30 authors read and approved the final version of the manuscript.  
31  
32  
33  
34

## 35 36 37 38 **COMPETING INTERESTS** 39

40 The authors have no conflict of interest to declare.  
41  
42  
43  
44

## 45 46 **Data sharing statement** 47

48 Extra data is available by emailing [zhihangpeng@njmu.edu.cn](mailto:zhihangpeng@njmu.edu.cn).  
49  
50  
51  
52  
53  
54

## 55 56 **REFERENCES** 57 58 59 60

- 1  
2  
3 1. Jia Z, Wang L, Chen R Y, *et al.* Tracking *the* evolution of HIV/AIDS in China from 1989–2009 to inform future  
4  
5 prevention and control efforts. *PLoS One* 2011; **6**: e25671.
- 6  
7  
8 2. Ministry of Health of the People’s Republic of China, UNAIDS, WHO. *National report for HIV/AIDS estimation*  
9  
10 *in China, 2011*. Beijing: Chinese Center for Disease Control and Prevention, 2011.
- 11  
12  
13 3. Feng L, Ding X, Lu R, *et al.* High HIV prevalence detected in 2006 and 2007 among men who have sex with men  
14  
15 in China's largest municipality: An alarming epidemic in Chongqing, China. *J Acquir Immune Defic Syndr*  
16  
17 2009;**52**:79-85.
- 18  
19  
20 4. Ma X, Zhang Q, He X, *et al.* Trends in prevalence of HIV, syphilis, hepatitis C, hepatitis B, and sexual risk  
21  
22 behavior among men who have sex with men: results of 3 consecutive respondent-driven sampling surveys in  
23  
24 Beijing, 2004 through 2006. *J Acquir Immune Defic Syndr* 2007;**45**:581-7.
- 25  
26  
27 5. Zhang M, Chu Z, Wang H, *et al.* A rapidly increasing incidence of HIV and syphilis among men who have sex  
28  
29 with men in a major city of China. *AIDS Res Hum Retroviruses* 2011;**27**:1139-40.
- 30  
31  
32 6. Lu F, Fu JH, Zhang RF,*et al.* Analysis of HIV epidemic situation and immigrant population. *Infect Dis Info*  
33  
34 2006;**19**:259-61.
- 35  
36  
37 7. Fan S, Lu H, Ma X, *et al.* Behavioral and serologic survey of men who have sex with men in Beijing, China:  
38  
39 implication for HIV intervention. *AIDS Patient Care STDS* 2012;**26**:148-55.
- 40  
41  
42 8. Berg CJ, Nehl EJ, Wong FY, *et al.* Prevalence and correlates of tobacco use among a sample of MSM in Shanghai,  
43  
44 China. *Nicotine Tob Res* 2011;**13**:22-8.
- 45  
46  
47 9. Liu H, Yang H, Li X, *et al.* Men who have sex with men and human immunodeficiency virus/sexually transmitted  
48  
49 disease control in China. *Cell Res* 2005;**15**:858.
- 50  
51  
52 10. Lau JT, Wang M, Wong HN, *et al.* Prevalence of bisexual behaviors among men who have sex with men (MSM)  
53  
54 in China and associations between condom use in MSM and heterosexual behaviors. *Sex Transm Dis*  
55  
56  
57  
58  
59  
60

- 2008;**35**:406-13.
11. He N, Wong FY, Huang ZJ, *et al.* HIV risks among two types of male migrants in Shanghai, China: money boys vs. general male migrants. *AIDS* 2007;**21**:S73-9.
  12. Yang X, Derlega VJ, Luo H. Migration, behaviour change and HIV/STD risks in China. *AIDS Care* 2007;**19**:282-8.
  13. Yang X. Temporary migration and HIV risk behaviors in China. *Environment and Planning A* 2006;**38**:1527.
  14. Peng Y, Chang W, Zhou H, *et al.* Factors associated with health-seeking behavior among migrant workers in Beijing, China. *BMC Health Serv Res* 2010;**10**:69.
  15. Shi TX, Zhang BC, Li XF, *et al.* Study on the high risk behaviors related to AIDS among men who having sex with men in the floating population. *Chin J Epidemiol* 2009;**30**:668.
  16. China Daily (2009, July 10). New HIV/AIDS cases surge in Beijing. Retrieved from [http://www.chinadaily.com.cn/china/2009-07/10/content\\_8405670.htm](http://www.chinadaily.com.cn/china/2009-07/10/content_8405670.htm) (accessed 30 Aug 2013).
  17. Wang B, Li X, Stanton B, *et al.* Socio-demographic and behavioral correlates for HIV and syphilis infections among migrant men who have sex with men in Beijing, China. *AIDS Care* 2013;**25**:249-57.
  18. Guo Y, Li X, Song Y, *et al.* Bisexual behavior among Chinese young migrant men who have sex with men: implications for HIV prevention and intervention. *AIDS Care* 2012;**24**:451-8.
  19. Xia DY, Lu HY, Liu GW, *et al.* Prevalence of HIV infection, syphilis, HCV and risk behaviors among migrant population in Beijing. *Chin J AIDS STD* 2011;**17**:430-3.
  20. Ruan Y, Luo F, Jia Y, *et al.* Risk factors for syphilis and prevalence of HIV, hepatitis B and C among men who have sex with men in Beijing, China: implications for HIV prevention. *AIDS Behav* 2009;**13**:663-70.
  21. Li D, Li S, Liu Y, *et al.* HIV incidence among men who have sex with men in Beijing: a prospective cohort study. *BMJ Open* 2012;**2**:e001829.

- 1  
2  
3 22. Xu JJ, Zhang M, Brown K, *et al.* Syphilis and HIV seroconversion among a 12-month prospective cohort of men  
4 who have sex with men in Shenyang, China. *Sex Transm Dis* 2010;**37**:432-9.  
5  
6  
7  
8 23. Xu J, An M, Han X, *et al.* Prospective cohort study of HIV incidence and molecular characteristics of HIV among  
9 men who have sex with men (MSM) in Yunnan Province, China. *BMC Infect Dis* 2013;**13**:3.  
10  
11  
12  
13 24. Outlaw AY, Phillips G, Hightow-Weidman LB, *et al.* Age of MSM sexual debut and risk factors: results from a  
14 multisite study of racial/ethnic minority YMSM living with HIV. *AIDS Patient Care STDS* 2011;**25**:S23-9.  
15  
16  
17  
18 25. Neilands TB, Steward WT, Choi KH. Assessment of stigma towards homosexuality in China: a study of men who  
19 have sex with men. *Arch Sex Behav* 2008;**37**:838-44.  
20  
21  
22  
23 26. Guo H, Wei JF, Yang H, *et al.* Rapidly increasing prevalence of HIV and syphilis and HIV-1 subtype  
24 characterization among men who have sex with men in Jiangsu, China. *Sex Transm Dis* 2009; **36**:120-125.  
25  
26  
27  
28 27. Galvin SR, Cohen MS. The role of sexually transmitted diseases in HIV transmission. *Nat Rev Microbiol*  
29 2004;**2**:33-42.  
30  
31  
32  
33 28. Hightow-Weidman LB, Jones K, Wohl AR, *et al.* Early linkage and retention in care: findings from the outreach,  
34 linkage, and retention in care initiative among young men of color who have sex with men. *AIDS Patient Care*  
35 *STDS* 2011;**25**:S31-8.  
36  
37  
38  
39 29. Seal DW, Kelly JA, Bloom FR, *et al.* HIV prevention with young men who have sex with men: what young men  
40 themselves say is needed. *AIDS Care* 2000;**12**:5-26.  
41  
42  
43  
44 30. Peng Z, Yang H, Norris J, *et al.* HIV Incidence and Predictors Associated with Retention in a Cohort of Men Who  
45 have Sex with Men in Yangzhou, Jiangsu Province, China. *PLoS One* 2012;**7**:e52731.  
46  
47  
48  
49  
50  
51  
52  
53  
54  
55  
56  
57  
58  
59  
60

STROBE Statement—Checklist of items that should be included in reports of *cohort studies*

|                              | Item No | Recommendation                                                                                                                                                                                               | Reported on page # |
|------------------------------|---------|--------------------------------------------------------------------------------------------------------------------------------------------------------------------------------------------------------------|--------------------|
| <b>Title and abstract</b>    | 1       | (a) Indicate the study's design with a commonly used term in the title or the abstract                                                                                                                       | 1                  |
|                              |         | (b) Provide in the abstract an informative and balanced summary of what was done and what was found                                                                                                          | 1                  |
| <b>Introduction</b>          |         |                                                                                                                                                                                                              |                    |
| Background/rationale         | 2       | Explain the scientific background and rationale for the investigation being reported                                                                                                                         | 1-2                |
| Objectives                   | 3       | State specific objectives, including any prespecified hypotheses                                                                                                                                             | 3                  |
| <b>Methods</b>               |         |                                                                                                                                                                                                              |                    |
| Study design                 | 4       | Present key elements of study design early in the paper                                                                                                                                                      | 3                  |
| Setting                      | 5       | Describe the setting, locations, and relevant dates, including periods of recruitment, exposure, follow-up, and data collection                                                                              | 3                  |
| Participants                 | 6       | (a) Give the eligibility criteria, and the sources and methods of selection of participants. Describe methods of follow-up                                                                                   | 4                  |
|                              |         | (b) For matched studies, give matching criteria and number of exposed and unexposed                                                                                                                          | 4                  |
| Variables                    | 7       | Clearly define all outcomes, exposures, predictors, potential confounders, and effect modifiers. Give diagnostic criteria, if applicable                                                                     | 4                  |
| Data sources/<br>measurement | 8*      | For each variable of interest, give sources of data and details of methods of assessment (measurement). Describe comparability of assessment methods if there is more than one group                         | 4                  |
| Bias                         | 9       | Describe any efforts to address potential sources of bias                                                                                                                                                    | 5                  |
| Study size                   | 10      | Explain how the study size was arrived at                                                                                                                                                                    | 3                  |
| Quantitative variables       | 11      | Explain how quantitative variables were handled in the analyses. If applicable, describe which groupings were chosen and why                                                                                 | 5                  |
| Statistical methods          | 12      | (a) Describe all statistical methods, including those used to control for confounding                                                                                                                        | 5                  |
|                              |         | (b) Describe any methods used to examine subgroups and interactions                                                                                                                                          |                    |
|                              |         | (c) Explain how missing data were addressed                                                                                                                                                                  |                    |
|                              |         | (d) If applicable, explain how loss to follow-up was addressed                                                                                                                                               |                    |
|                              |         | (e) Describe any sensitivity analyses                                                                                                                                                                        | 5                  |
| <b>Results</b>               |         |                                                                                                                                                                                                              |                    |
| Participants                 | 13*     | (a) Report numbers of individuals at each stage of study—eg numbers potentially eligible, examined for eligibility, confirmed eligible, included in the study, completing follow-up, and analysed            | 6                  |
|                              |         | (b) Give reasons for non-participation at each stage                                                                                                                                                         |                    |
|                              |         | (c) Consider use of a flow diagram                                                                                                                                                                           |                    |
| Descriptive data             | 14*     | (a) Give characteristics of study participants (eg demographic, clinical, social) and information on exposures and potential confounders                                                                     | 6                  |
|                              |         | (b) Indicate number of participants with missing data for each variable of interest                                                                                                                          |                    |
|                              |         | (c) Summarise follow-up time (eg, average and total amount)                                                                                                                                                  | 10                 |
| Outcome data                 | 15*     | Report numbers of outcome events or summary measures over time                                                                                                                                               | 8                  |
| Main results                 | 16      | (a) Give unadjusted estimates and, if applicable, confounder-adjusted estimates and their precision (eg, 95% confidence interval). Make clear which confounders were adjusted for and why they were included | 8-9                |

|                          |    |                                                                                                                                                                            |       |
|--------------------------|----|----------------------------------------------------------------------------------------------------------------------------------------------------------------------------|-------|
|                          |    | (b) Report category boundaries when continuous variables were categorized                                                                                                  |       |
|                          |    | (c) If relevant, consider translating estimates of relative risk into absolute risk for a meaningful time period                                                           |       |
| Other analyses           | 17 | Report other analyses done—eg analyses of subgroups and interactions, and sensitivity analyses                                                                             | 9-10  |
| <b>Discussion</b>        |    |                                                                                                                                                                            |       |
| Key results              | 18 | Summarise key results with reference to study objectives                                                                                                                   | 12-13 |
| Limitations              | 19 | Discuss limitations of the study, taking into account sources of potential bias or imprecision. Discuss both direction and magnitude of any potential bias                 | 14    |
| Interpretation           | 20 | Give a cautious overall interpretation of results considering objectives, limitations, multiplicity of analyses, results from similar studies, and other relevant evidence | 12-13 |
| Generalisability         | 21 | Discuss the generalisability (external validity) of the study results                                                                                                      | 14    |
| <b>Other information</b> |    |                                                                                                                                                                            |       |
| Funding                  | 22 | Give the source of funding and the role of the funders for the present study and, if applicable, for the original study on which the present article is based              | 15    |

\*Give information separately for exposed and unexposed groups.

**Note:** An Explanation and Elaboration article discusses each checklist item and gives methodological background and published examples of transparent reporting. The STROBE checklist is best used in conjunction with this article (freely available on the Web sites of PLoS Medicine at <http://www.plosmedicine.org/>, Annals of Internal Medicine at <http://www.annals.org/>, and Epidemiology at <http://www.epidem.com/>). Information on the STROBE Initiative is available at <http://www.strobe-statement.org>.

# BMJ Open

## High Incidence of HIV and syphilis among Migrant Men Who have Sex with Men in Beijing, China: A Prospective Cohort Study

|                                 |                                                                                                                                                                                                                                                                                                                                                                                                                                                                                                                                                                                                                                                                                                                                                                                                                                                                                                                                                                                                                                                            |
|---------------------------------|------------------------------------------------------------------------------------------------------------------------------------------------------------------------------------------------------------------------------------------------------------------------------------------------------------------------------------------------------------------------------------------------------------------------------------------------------------------------------------------------------------------------------------------------------------------------------------------------------------------------------------------------------------------------------------------------------------------------------------------------------------------------------------------------------------------------------------------------------------------------------------------------------------------------------------------------------------------------------------------------------------------------------------------------------------|
| Journal:                        | <i>BMJ Open</i>                                                                                                                                                                                                                                                                                                                                                                                                                                                                                                                                                                                                                                                                                                                                                                                                                                                                                                                                                                                                                                            |
| Manuscript ID:                  | bmjopen-2014-005351.R1                                                                                                                                                                                                                                                                                                                                                                                                                                                                                                                                                                                                                                                                                                                                                                                                                                                                                                                                                                                                                                     |
| Article Type:                   | Research                                                                                                                                                                                                                                                                                                                                                                                                                                                                                                                                                                                                                                                                                                                                                                                                                                                                                                                                                                                                                                                   |
| Date Submitted by the Author:   | 25-Jun-2014                                                                                                                                                                                                                                                                                                                                                                                                                                                                                                                                                                                                                                                                                                                                                                                                                                                                                                                                                                                                                                                |
| Complete List of Authors:       | Mao, Hengyi; Nanjing Medical University, Department of Epidemiology & Biostatistics, School of Public Health<br>Ma, Wenzhe; Nanjing Medical University, Department of Epidemiology & Biostatistics, School of Public Health<br>Lu, Hongyan; Beijing Center for Disease Prevention and Control, Department of STDs/AIDS Prevention and Control<br>Wang, Lu; Chinese Center for Disease Control and Prevention, National Center for AIDS/STD Control and Prevention<br>Zheng, Hui; Nanjing Medical University, Department of Epidemiology & Biostatistics, School of Public Health<br>Zhu, Yingying; Nanjing Medical University, Department of Epidemiology & Biostatistics, School of Public Health<br>Peng, Zhihang; Nanjing Medical University, Department of Epidemiology & Biostatistics, School of Public Health<br>Yu, Rongbin; Nanjing Medical University, Department of Epidemiology & Biostatistics, School of Public Health<br>Wang, Ning; Chinese Center for Disease Control and Prevention, National Center for AIDS/STD Control and Prevention |
| <b>Primary Subject Heading</b>: | HIV/AIDS                                                                                                                                                                                                                                                                                                                                                                                                                                                                                                                                                                                                                                                                                                                                                                                                                                                                                                                                                                                                                                                   |
| Secondary Subject Heading:      | Epidemiology, Sexual health, Infectious diseases                                                                                                                                                                                                                                                                                                                                                                                                                                                                                                                                                                                                                                                                                                                                                                                                                                                                                                                                                                                                           |
| Keywords:                       | HIV & AIDS < INFECTIOUS DISEASES, Epidemiology < INFECTIOUS DISEASES, SEXUAL MEDICINE                                                                                                                                                                                                                                                                                                                                                                                                                                                                                                                                                                                                                                                                                                                                                                                                                                                                                                                                                                      |
|                                 |                                                                                                                                                                                                                                                                                                                                                                                                                                                                                                                                                                                                                                                                                                                                                                                                                                                                                                                                                                                                                                                            |

SCHOLARONE™  
Manuscripts

1  
2  
3  
4  
5 High Incidence of HIV and syphilis among Migrant Men Who have Sex with  
6  
7  
8 Men in Beijing, China: A Prospective Cohort Study  
9

10 Hengyi Mao<sup>1#</sup>, Wenzhe Ma<sup>1#</sup>, Hongyan Lu<sup>2</sup>, Lu Wang<sup>3</sup>, Hui Zheng<sup>1</sup>, Yingying Zhu<sup>1</sup>, Zhihang Peng<sup>1\*</sup>,

11  
12 Rongbin Yu<sup>1</sup>, Ning Wang<sup>3\*</sup>  
13  
14  
15  
16  
17  
18  
19  
20

- 21 1. Department of Epidemiology & Biostatistics, School of Public Health, Nanjing Medical University,  
22  
23 Nanjing, China;  
24  
25  
26 2. Department of STDs/AIDS Prevention and Control, Beijing Center for Disease Prevention and Control, Beijing,  
27  
28 China;  
29  
30  
31 3. National Center for AIDS/STD Control and Prevention, Chinese Center for Disease Control and Prevention,  
32  
33 Beijing, China.  
34  
35

36 #These authors contributed equally to this work  
37

38 \*Corresponding author  
39

40  
41 Postal address: 818th east Tianyuan Road, Nanjing, China;  
42

43  
44 E-mail: zhihangpeng@njmu.edu.cn; wangning\_12@126.com  
45

46  
47 Tel: 86-25-86868436;  
48

49  
50 Fax: 86-25-86868499.  
51  
52  
53

54 **Keywords:** HIV; syphilis; male homosexuality; cohort study; China  
55  
56  
57

58  
59 **Word Count:** 3490  
60



## ABSTRACT

**Objectives:** The purpose of the study was to investigate the incidence of HIV and syphilis and their related factors, as well as to examine the predictors associated with seroconversion among migrant men who have sex with men in Beijing, China.

**Design:** Prospective cohort study.

**Setting:** Beijing, China.

**Participants:** 511 HIV-negative migrant MSM.

**Primary and secondary outcome measures:** Sociodemographic and behavioral information of participants, HIV and syphilis incidence rates, and factors associated with HIV/syphilis seroconversion and cohort retention.

**Results:** Of the 511 participants, 60.3% (308) and 52.4% (273) were retained at the four-month and eight-month follow-up visits, respectively. The HIV and syphilis incidence rates were 7.83 (95% CI 4.48 to 12.72) and 11.11 (95% CI 6.47 to 17.80) cases per 100 person-years, respectively. HIV seroconversion was significantly associated with had first anal intercourse at age 15 or younger (adjusted hazard ratio (aHR) = 9.20, 95% CI 1.94 to 43.56) and ever had group sex (aHR = 4.30, 95% CI 1.40 to 13.18). Bisexual orientation (aHR = 5.09, 95% CI 1.02 to 25.57) was significantly associated with syphilis seroconversion. Predictors associated with both four-month and eight-month retention rates included age  $\geq$  25 years old and living in Beijing for more than one year.

**Conclusions:** The high incidence of HIV and syphilis among migrant MSM are cause for concern. A comprehensive strategy should be implemented to maintain a higher retention rate among migrant MSM.

### Strengths and limitations of this study

- First cohort study to assess incidence of HIV and syphilis among migrant MSM in Beijing.
- Cox regression analysis and stepwise multiple logistic regression were used to identify factors associated with

1  
2  
3 HIV/syphilis seroconversion and cohort retention, respectively.

- 4 ● Retention rates were relatively low, which means that the estimates of HIV/syphilis seroconversions may be biased
- 5 because no evidence showed a balance between those retained in the study and those lost to follow-up.
- 6
- 7 ● Sampling methods may have led to selection bias.
- 8
- 9 ● No outflow population was included, and the proportions of migrants from different provinces varied, which may
- 10 lead to difficulties with generalization of the data.
- 11
- 12
- 13
- 14
- 15
- 16
- 17
- 18
- 19

## 20 INTRODUCTION

21  
22 In China during the last decade, sexual transmission has become the major route for HIV transmission.<sup>1</sup> As an  
23 increasing proportion of infections among people living with HIV/AIDS (PLWHA), cases attributed to homosexual  
24 transmission rose from 7.3% in 2005 to 16.1% in 2011.<sup>2</sup> The 2011 HIV epidemic assessment report showed that among  
25 the estimated 780,000 people living with HIV/AIDS, homosexual transmission accounted for 17.4% of infections, an  
26 increase from 14.7% in 2009.<sup>3</sup> A growing number of studies have revealed the upward trend of HIV incidence among  
27 MSM in different parts of China. For example, incidence increased from 8.0 to 15.4 per 100 person-years during  
28 2006–2009 in Chongqing, from 5.1 to 10.2 per 100 person-years during 2007–2009 in Liaoning, from 5.7 to 8.2 per  
29 100 person-years during 2008–2011 in Jiangsu and from 3.5 to 6.3 per 100 person-years during 2010–2012 in  
30 Zhejiang.<sup>4</sup>

31  
32 In recent years, there has been growing awareness that internal migration within China may be shifting the HIV  
33 epidemic by broadening social integration and connecting populations from different regions through sexual networks.<sup>1</sup>

34  
35 Data from national behavioral surveillance during 2004–2005 showed that migrant HIV/AIDS cases accounted for more  
36 than 50% of total infections in nine mainland provinces.<sup>5</sup> Numbers of cohort study on MSM have been implemented in  
37 China to reveal HIV epidemic among MSM, however the retentions of MSM were not so high in most of them.

1  
2 Retentions of these cohort studies can hardly maintain over 70% at 12-months follow-up, few of them even below  
3  
4 20%.<sup>6-9</sup> There are reasons for low retention rates, and migration of MSM may be an important one.<sup>8</sup> Moreover, studies  
5  
6 implemented among urban MSM also revealed a high proportion of migrants among MSM in major cities, such as in  
7  
8 Beijing (88%),<sup>10</sup> Chongqing (80.3%)<sup>11</sup> and Shanghai (79.7%).<sup>12</sup> Although migration itself does not spread HIV or other  
9  
10 sexually transmitted diseases (STDs), it may increase the possibility of infection when combined with high risk  
11  
12 behaviors, which are prevalent among MSM. It has been confirmed in numerous studies that high risk behaviors such  
13  
14 as unprotected anal sex, commercial sex, group sex, casual sex and having multiple sexual partners are prevalent among  
15  
16 MSM in China.<sup>13-15</sup> On the other hand, perceived stigma and discrimination due to traditional Chinese culture and  
17  
18 conservative social values have increasingly led Chinese MSM to disguise their sexual orientation with matrimony,  
19  
20 which leads to a potential risk of transmitting HIV to the general population via heterosexual transmission.<sup>14</sup> As for  
21  
22 migrants, lacking the stability of a family or a home community and with generally low educational levels, limited  
23  
24 knowledge of HIV/AIDS prevention, and discrimination and marginalization from the mainstream metropolitan society,  
25  
26 high risk behaviors may occur more frequently.<sup>16, 17</sup> Furthermore, due to China's household registration system and  
27  
28 urban social security system, migrants have limited access to comprehensive, convenient and long-term health  
29  
30 services.<sup>18</sup> Recently, some cross-sectional studies in China demonstrated that compared to local MSM, migrant MSM  
31  
32 engage in more high risk sexual behaviors such as multiple sexual partners, higher frequencies of anal and oral  
33  
34 intercourse, and unprotected sexual behaviors with both males and females.<sup>15, 19</sup> As a marginal and vulnerable  
35  
36 subpopulation, migrant MSM should be accorded a high level of consideration by researchers.

37  
38 Beijing, the capital of China and a center of political, economic and cultural activity, is a magnet for the migrant  
39  
40 population. In 2012, Beijing's metropolitan population included some 7.7 million migrants, with the migrant population  
41  
42 accounting for 37.4% of the total population of Beijing (China National Bureau of Statistics, 2013). According to  
43  
44 statistics from the Beijing Municipal Bureau of Health, the proportion of MSM in HIV/AIDS cases increased from  
45  
46  
47  
48  
49  
50  
51  
52  
53  
54  
55  
56  
57  
58  
59  
60

1  
2  
3 22.8% in 2006 to 69.1% at the end of October 2013.<sup>20</sup> In addition, prior research among MSM in Beijing revealed that  
4  
5 with the increasing epidemic of HIV among MSM in recent years, the number of migrants among recruited participants  
6  
7 also showed a remarkable upward trend.<sup>10, 11</sup> This phenomenon implies the following: (1) migrant MSM play a main  
8  
9 role in MSM society in Beijing; (2) this marginal population emerged gradually with the constant improvement of  
10  
11 sampling methods; and (3) more targeted studies of this subpopulation are urgently needed, while at present only a few  
12  
13 cross-sectional studies have been conducted to investigate its HIV/STD infections and relative risk factors.<sup>21, 22</sup> Thus,  
14  
15 the purpose of this research was to assess the incidence of HIV and syphilis and examine the predictors associated with  
16  
17 seroconversion and retention in a prospective cohort study among migrant MSM in Beijing, China.  
18  
19  
20  
21  
22  
23  
24

## 25 **METHODS**

### 26 **Study Design and Study Population**

27  
28  
29  
30 This prospective cohort study was conducted in Beijing. Participants were all Chinese citizens and were recruited  
31  
32 through three methods. First, study participants were recruited directly through website advertisements by a  
33  
34 nongovernmental AIDS volunteer group (<http://www.hivolunt.net>). Second, peer recruiters were hired and trained to  
35  
36 distribute flyers with study-related information at MSM-frequented venues (e.g., MSM clubs, bars, parks and  
37  
38 bathhouses). Thirdly, study participants were encouraged to refer their peers to enroll in the study. Once a potential  
39  
40 participant had been referred or identified, local research team members approached the individual to verify eligibility,  
41  
42 which included age  $\geq 18$  years old, male individual, HIV-negative, had sex with another male in the past 12 months,  
43  
44 lacked permanent household registration in Beijing and provided written informed consent. A total of 547 participants  
45  
46 were screened during the baseline screening survey from September to October 2009, of whom 36 were HIV-positive  
47  
48 and 162 were syphilis-positive. In consideration of the curability and repeatability of syphilis infection, participants  
49  
50 who were syphilis-positive at baseline were still recruited in the cohort. Thus a total of 511 eligible and consenting  
51  
52  
53  
54  
55  
56  
57  
58  
59  
60

1  
2  
3 MSM were enrolled into the prospective cohort, of whom 141 were syphilis-positive. Participants were followed up for  
4  
5 four and eight months after the baseline survey. At each study visit (baseline, four-month follow-up and eight-month  
6  
7 follow-up), eligible participants were interviewed by trained health professionals in a private room of the study clinic,  
8  
9 and blood plasma specimens were collected and analyzed for HIV and syphilis antibodies by experienced physicians.  
10  
11 One week later, each participant received their test results anonymously by a private identification code. All participants  
12  
13 who tested positive for HIV/syphilis received additional posttest counseling and referrals to relevant free services.  
14  
15 Every participant received 50 RMB (7.4 USD), 12 free condoms and one free lubricant after each completed study visit.  
16  
17  
18 Every participant was asked to provide at least two different and current contact methods, and reminder calls were  
19  
20 made before the follow-up day to verify that the exact time of the visit would be convenient for them. The study  
21  
22 protocol and informed consent forms were approved by the Institutional Review Boards of the National Center for  
23  
24 AIDS/STD Control and Prevention of the China Center for Disease Control and Prevention (Figure 1).  
25  
26  
27  
28  
29  
30  
31  
32

### 33 **Data Collection and Laboratory Tests**

34  
35 Questionnaire-based interviews were conducted on a one-on-one basis in a separate private room of the district clinic.  
36  
37  
38 Data on demographics, sexual behavior and history of STDs were collected. Participants' questionnaires and blood  
39  
40 specimens were linked through assignment of a unique identifier code in the follow-up visits.  
41  
42  
43 Blood specimens were tested for HIV and syphilis infection. The HIV infection status was screened by an ELISA  
44  
45 (InTec Products Company, Xiamen, China) screening, and confirmed by an HIV-1/2 Western Blot (HIV Blot 2.2  
46  
47 WBTM, Genelabs Diagnostics, Singapore). Syphilis infection was determined by a rapid plasma reagin (RPR) test  
48  
49 (Shanghai Rongsheng, Shanghai, China), and confirmed using *Treponema pallidum* particle assay (TPPA) test  
50  
51 (Fujirebio Inc, Tokyo, Japan).  
52  
53  
54  
55  
56  
57  
58  
59  
60

## Statistical Analysis

Questionnaire data were double-entered and then checked for accuracy using EpiData software (The EpiData Association, Odense, Denmark, version 3.1). Data were analyzed using Stata/SE (StataCorp LP, USA, version 12.0 for Windows). HIV seroconversion was estimated to have occurred at the midpoint between the time of baseline HIV test and the time of the follow-up HIV test with a seropositive result. Syphilis seroconversion was estimated to have occurred at the halfway point between the previous visit and the visit where seroconversion occurred. HIV/syphilis incidence density was calculated based on a Poisson distribution, with number of seroconversion incidents within the follow-up period as the numerator and person-years (PY) over the entire follow-up period as the denominator. Categorical factors associated with retention rate were analyzed by univariate logistic regression, including baseline demographic and behavioral characteristics. A stepwise multiple logistic regression (out 0.05, in 0.02) was used to select independent factors for the retention rate. A Cox regression model was used in univariate and multiple regression analyses to identify correlates of time to HIV seroconversion. Statistically significant variables in univariate analysis ( $P < 0.10$ ) were entered simultaneously into a multivariate Cox proportional hazard regression model to determine the adjusted hazard ratio (aHR) for HIV/syphilis seroconversion-related risk factors.

## RESULTS

### Baseline Characteristics of the Participants

Of 511 participants, the median age was 29 years; 94.32% belonged to the Han ethnic group; 64.77% were single, 22.90% were married or cohabiting, and 12.33% were separated or divorced or widowed. For education level, 73.19% had received a high school education or lower. About half (54.01%) had monthly incomes  $< 300$ US\$. Participants who identified themselves as exclusively homosexual or bisexual accounted for 60.67% and 37.57%, respectively. A total of 16.05% and 44.03% of the participants thought it was impossible or improbable they would be infected with HIV,

1  
2  
3 respectively. The median age of sexual debut was 20 years, and 58.71% experienced their sexual debut with a male.  
4  
5 The median age of first anal intercourse was 22, and 58.65% of participants did not use a condom at first anal  
6  
7 intercourse. In the past year, 78.67% of the participants had ever received condoms, 65.17% had ever received lubricant,  
8  
9 23.68% had ever taken part in peer education, 18.40% had ever received examination or treatment for STDs and  
10  
11 52.49% had ever received voluntary counseling and testing services (VCTs).  
12  
13  
14 Regarding behaviors in the past six months among participants, the median number of male sex partners was three. For  
15  
16 high risk behaviors, 327 (63.99%) had oral sex with male sex partners, 22 (6.73%) of them had consistent condom use  
17  
18 with regular sex partners, and 26 (7.95%) with casual partners; 511 (100%) had anal sex with male sex partners,  
19  
20 13.11% of them had consistent condom use with regular sex partners, and 66 (18.70%) with casual partners. A total of  
21  
22 61 (11.94%) participants had ever engaged in commercial sexual behavior, among whom 35 (57.38%) had paid for sex  
23  
24 and 43 (70.49%) had received money for sex. A total of 59 (11.55%) had ever engaged in group sex, which happened  
25  
26 almost exclusively (96.61%) among males. A total of 166 (32.49%) had ever engaged in sex under the influence of  
27  
28 alcohol, among whom 152 (92.77%) had homosexual intercourse while intoxicated (Table 1).  
29  
30  
31  
32  
33  
34  
35  
36  
37  
38

39 **Table 1 Sociodemographic characteristics of the 547 study participants in the cohort of migrant MSM in Beijing**

| Variables                                  | n   | %     |
|--------------------------------------------|-----|-------|
| Overall, N                                 | 511 | 100   |
| Age (median, years)                        | 29  | -     |
| 18-24                                      | 149 | 29.16 |
| ≥25                                        | 362 | 70.84 |
| Ethnicity                                  |     |       |
| Han                                        | 482 | 94.32 |
| Minority                                   | 29  | 5.68  |
| Marital status                             |     |       |
| Single                                     | 331 | 64.77 |
| Married                                    | 114 | 22.31 |
| Cohabiting with male or female sex partner | 3   | 0.59  |
| Separated or divorced or widowed           | 63  | 12.33 |
| Duration of stay in Beijing                |     |       |
| < 1 year                                   | 173 | 33.85 |

|    |                                                                                |     |       |
|----|--------------------------------------------------------------------------------|-----|-------|
| 1  |                                                                                |     |       |
| 2  | ≥ 1 year                                                                       | 338 | 66.14 |
| 3  | Education level                                                                |     |       |
| 4  | High school and below                                                          | 374 | 73.19 |
| 5  | College and above                                                              | 137 | 26.81 |
| 6  | Monthly income (US\$)                                                          |     |       |
| 7  | < 300                                                                          | 276 | 54.01 |
| 8  | ≥ 300                                                                          | 235 | 45.99 |
| 9  | Self-reported sexual orientation                                               |     |       |
| 10 | Homosexual                                                                     | 310 | 60.67 |
| 11 | Heterosexual                                                                   | 8   | 1.57  |
| 12 | Bisexual                                                                       | 192 | 37.57 |
| 13 | Other                                                                          | 1   | 0.2   |
| 14 | Self-reported risk of HIV infection                                            |     |       |
| 15 | Impossible                                                                     | 82  | 16.05 |
| 16 | Improbable                                                                     | 225 | 44.03 |
| 17 | Possible                                                                       | 74  | 14.48 |
| 18 | Probable                                                                       | 15  | 2.94  |
| 19 | No idea                                                                        | 115 | 22.5  |
| 20 | Age of sexual debut (median,years)                                             | 20  |       |
| 21 | Gender of first sexual partner                                                 |     |       |
| 22 | Male                                                                           | 300 | 58.71 |
| 23 | Female                                                                         | 211 | 41.29 |
| 24 | Age of first anal intercourse(median, years)                                   | 22  |       |
| 25 | Had first anal intercourse before 15 years-old                                 | 13  | 2.54  |
| 26 | Number of male sex partners in the last 6 months (median)                      | 3   |       |
| 27 | Number of female sex partners in the last 6 months (median)                    | 0   |       |
| 28 | Oral sex with regular partners with consistent condom use in the past 6 months | 22  | 6.73  |
| 29 | Oral sex with casual partners with consistent condom use in the past 6 months  | 26  | 7.95  |
| 30 | Anal sex with regular partners with consistent condom use in the past 6 months | 67  | 13.11 |
| 31 | Anal sex with casual partners with consistent condom use in the past 6 months  | 66  | 18.7  |
| 32 | Ever had commercial sexual behavior                                            | 61  | 11.94 |
| 33 | Ever had group sex                                                             | 59  | 11.55 |
| 34 | Alcohol use prior to sex                                                       | 166 | 32.49 |
| 35 | Ever had sexually transmitted diseases (STDs)                                  | 84  | 16.44 |
| 36 | Have ever received condoms                                                     | 402 | 78.67 |
| 37 | Have ever received lubricant                                                   | 333 | 65.17 |
| 38 | Have ever received peer education                                              | 121 | 23.68 |
| 39 | Have ever received examination or treatment for STD                            | 94  | 18.4  |
| 40 | Have ever received voluntary counseling and testing (VCT) services             | 268 | 52.45 |
| 41 | Have ever received educational materials on AIDS/STD                           | 302 | 59.1  |

---

MSM, men who have sex with men; STD, sexually transmitted disease.



## Incidence of infections of HIV, syphilis, HIV-syphilis co-infection and factors predicting HIV and syphilis seroconversion

During the eight-month follow-up, 16 HIV seroconversions were observed over 204.27 person-years of observation, resulting in an incidence rate of 7.83 per 100 person-years (PY) (95% CI 4.48 to 12.72). At the four-month visit, the incidence of HIV was 8.33 per 100 PY (95% CI 3.81 to 15.81) and at the eight-month visit it was 3.83 per 100 PY (95% CI 1.54 to 7.89). During the eight-month follow-up period, syphilis incidence was 11.11 per 100 PY (95% CI 6.47 to 17.80). At the four-month and eight-month visits, the syphilis incidence was 10.03 per 100 PY (95% CI 4.33 to 19.76) and 15.25 per 100 PY (95% CI 6.97 to 28.94), respectively. Six HIV seroconversions were observed becoming syphilis-positive over 52.10 person-years, resulting in an incidence of co-infection of 11.52 per 100 PY (4.23 to 25.07). Multivariate Cox regression analysis indicated that age  $\leq 15$  years old at first anal intercourse (adjusted hazard ratio (aHR) = 9.20, 95% CI 1.94 to 43.56,  $p=0.050$ ) and ever had group sex (aHR=4.30, 95% CI 1.40 to 13.18,  $p=0.011$ ) were significantly associated with time to HIV seroconversion (Table 2). For syphilis incidence, bisexual orientation (aHR=5.09, 95% CI 1.02 to 25.57,  $p=0.048$ ), had more than one sex partners in the last 6 months (aHR=9.22, 95% CI 1.13 to 73.37,  $p=0.038$ ) was significantly identified as risk factors (Table 3).

**Table 2** Multivariate analyses of participant characteristics associated with incident HIV infection among migrant MSM in Beijing

| Factors                                      | No. of HIV seroconversions | Cumulative PY | HIV incidence (/100PY) | Univariate          |         | Multivariate         |         |
|----------------------------------------------|----------------------------|---------------|------------------------|---------------------|---------|----------------------|---------|
|                                              |                            |               |                        | HR (95% CI)         | p Value | Adjusted HR (95% CI) | p Value |
| Total                                        | 16                         | 204.27        | 7.83                   |                     |         |                      |         |
| Education                                    |                            |               |                        |                     |         |                      |         |
| Junior college and below                     | 13                         | 143.95        | 9.03                   | 1.00                |         |                      |         |
| Above junior college                         | 3                          | 60.32         | 4.97                   | 0.56(0.16 to 1.98)  | 0.370   |                      |         |
| Seeking partner through Internet             |                            |               |                        |                     |         |                      |         |
| NO                                           | 12                         | 109.45        | 10.96                  | 1.00                |         |                      |         |
| YES                                          | 4                          | 94.81         | 4.22                   | 0.39(0.12 to 1.20)  | 0.100   |                      |         |
| Age of first anal intercourse (median,years) |                            |               |                        |                     |         |                      |         |
| $\geq 15$                                    | 14                         | 200.99        | 6.97                   | 1.00                |         | 1.00                 |         |
| $< 15$                                       | 2                          | 3.28          | 60.98                  | 8.28(1.88 to 36.46) | 0.005   | 9.20(1.94 to 43.56)  | 0.005   |

|                                                                                  |    |        |       |                     |       |                     |       |
|----------------------------------------------------------------------------------|----|--------|-------|---------------------|-------|---------------------|-------|
| Ever had group sex                                                               |    |        |       |                     |       |                     |       |
| NO                                                                               | 11 | 183.48 | 6     | 1.00                |       | 1.00                |       |
| YES                                                                              | 5  | 20.78  | 24.06 | 3.95(1.37 to 11.38) | 0.011 | 4.30(1.40 to 13.18) | 0.011 |
| Knowledge of HIV/AIDS was acquired from                                          |    |        |       |                     |       |                     |       |
| Media                                                                            |    |        |       |                     |       |                     |       |
| NO                                                                               | 12 | 109.65 | 10.94 | 1.00                |       |                     |       |
| YES                                                                              | 4  | 94.62  | 4.23  | 0.39(0.12 to 1.20)  | 0.100 |                     |       |
| Internet                                                                         |    |        |       |                     |       |                     |       |
| NO                                                                               | 6  | 108.59 | 5.53  | 1.00                |       |                     |       |
| YES                                                                              | 10 | 95.68  | 10.45 | 0.38(0.12 to 1.19)  | 0.097 |                     |       |
| Consistent condom use during oral sex with regular partners in the past 6 months |    |        |       |                     |       |                     |       |
| NO                                                                               | 1  | 9.45   |       | 1.00                |       |                     |       |
| YES                                                                              | 15 | 194.82 |       | 0.73(0.10 to 5.50)  | 0.758 |                     |       |
| Consistent condom use during oral sex with casual partners in the past 6 months  |    |        |       |                     |       |                     |       |
| NO                                                                               | 0  | 7.70   | 0     | 1.00                |       |                     |       |
| YES                                                                              | 9  | 128.67 | 6.99  | -                   | -     |                     |       |
| Consistent condom use during anal sex with regular partners in the past 6 months |    |        |       |                     |       |                     |       |
| NO                                                                               | 3  | 29.18  | 10.28 | 1.00                |       |                     |       |
| YES                                                                              | 13 | 175.09 | 7.42  | 0.72(0.21 to 2.53)  | 0.609 |                     |       |
| Consistent condom use during anal sex with casual partners in the past 6 months  |    |        |       |                     |       |                     |       |
| NO                                                                               | 2  | 27.56  | 7.26  | 1.00                |       |                     |       |
| YES                                                                              | 10 | 115.99 | 8.62  | 1.19(0.26 to 5.42)  | 0.825 |                     |       |

PY, person-years; HR, hazard ratio.

**Table 3 Multivariate analyses of participant characteristics associated with incident syphilis infection among migrant MSM in Beijing**

| Factors                                                                          | No. of syphilis seroconversions | Cumulative PY | Syphilis incidence (/100PY) | Univariate          |         | Multivariate         |         |
|----------------------------------------------------------------------------------|---------------------------------|---------------|-----------------------------|---------------------|---------|----------------------|---------|
|                                                                                  |                                 |               |                             | HR (95% CI)         | p Value | Adjusted HR (95% CI) | p Value |
| Total                                                                            | 17                              | 152.95        | 11.11                       |                     |         |                      |         |
| Self-reported sexual orientation                                                 |                                 |               |                             |                     |         |                      |         |
| Homosexual                                                                       | 9                               | 96.89         | 9.29                        | 1.00                |         |                      |         |
| Heterosexual                                                                     | 0                               | 1.42          | 0                           | -                   |         |                      |         |
| Bisexual                                                                         | 8                               | 54.64         | 14.64                       | 5.56(1.10 to 27.05) | 0.038   | 5.09(1.02 to 25.57)  | 0.048   |
| Other                                                                            | 0                               | 0             | -                           | -                   |         |                      |         |
| Number of female sex partners in the last 6 months                               |                                 |               |                             |                     |         |                      |         |
| ≤1                                                                               | 16                              | 149.9         | 10.67                       | 1.00                |         |                      |         |
| ≥2                                                                               | 1                               | 3.05          | 32.79                       | 9.22(1.13 to 75.37) | 0.038   |                      |         |
| Seeking partners in bar/dancing hall/tearoom/chamber                             |                                 |               |                             |                     |         |                      |         |
| NO                                                                               | 11                              | 129.41        | 8.5                         | 1.00                |         |                      |         |
| YES                                                                              | 6                               | 23.55         | 25.48                       | 3.12(0.75 to 13.07) | 0.119   |                      |         |
| Consistent condom use during oral sex with regular partners in the past 6 months |                                 |               |                             |                     |         |                      |         |

|                                                                                  |    |        |       |                     |       |
|----------------------------------------------------------------------------------|----|--------|-------|---------------------|-------|
| NO                                                                               | 1  | 6.24   | 16.03 | 1.00                |       |
| YES                                                                              | 16 | 146.71 | 10.91 | 0.24(0.03 to 1.99 ) | 0.188 |
| Consistent condom use during oral sex with casual partners in the past 6 months  |    |        |       |                     |       |
| NO                                                                               | 0  | 4.37   | 0     | 1.00                |       |
| YES                                                                              | 8  | 92.58  | 8.64  | -                   |       |
| Consistent condom use during anal sex with regular partners in the past 6 months |    |        |       |                     |       |
| NO                                                                               | 2  | 24.52  | 8.16  | 1.00                |       |
| YES                                                                              | 15 | 128.43 | 11.68 | 0.57(0.11 to 2.80)  | 0.485 |
| Consistent condom use during anal sex with casual partners in the past 6 months  |    |        |       |                     |       |
| NO                                                                               | 0  | 19.80  | 0     | 1.00                |       |
| YES                                                                              | 11 | 83.21  | 13.22 | -                   |       |

### Predictors of cohort retention

Of the 511 participants, 60.3% (308) were retained in the cohort at the four-month follow-up and 54.6% (274) were retained at the eight-month follow-up.

Univariate factors among baseline characteristics which were significantly associated with four-month retention were analysed with stepwise multiple logistic regression. Four factors were kept in the final model, including age > 25 years old (adjusted odds ratio (AOR) = 1.81, 95% CI 1.07 to 3.06,  $p = 0.026$ ), living in Beijing for more than one year (AOR = 3.68, 95% CI 2.04 to 6.64,  $p < 0.001$ ), had at least one female sex partners in the last six months (AOR = 0.48, 95% CI 0.29 to 0.80,  $p = 0.005$ ), and had ever received VCTs in the past 12 months (AOR = 1.71, 95% CI 1.07 to 2.72,  $p < 0.024$ ) (Table 4).

**Table 4 Factors associated with four-month retention rate in a cohort study of migrant MSM in Beijing, China, using stepwise multiple logistic analysis**

| Factor                                             | N   | Retention rate % (n) | OR (95% CI)        | p Value | Adjusted OR (95% CI) | p Value |
|----------------------------------------------------|-----|----------------------|--------------------|---------|----------------------|---------|
| Age                                                |     |                      |                    |         |                      |         |
| 18-24                                              | 149 | 46.98(70)            | 1.00               |         | 1.00                 |         |
| ≥25                                                | 362 | 65.75(238)           | 2.17(1.47 to 3.19) | <0.001  | 1.81(1.07 to 3.06)   | 0.026   |
| Duration of stay in Beijing                        |     |                      |                    |         |                      |         |
| < 1 year                                           | 95  | 34.74(33)            | 1.00               |         | 1.00                 |         |
| ≥ 1 year                                           | 416 | 66.27(208)           | 3.66(2.29 to 5.85) | <0.001  | 3.68 (2.04 to 6.64)  | <0.001  |
| Number of female sex partners in the last 6 months |     |                      |                    |         |                      |         |

|                                                                                    |     |             |                    |        |                    |       |
|------------------------------------------------------------------------------------|-----|-------------|--------------------|--------|--------------------|-------|
| 0                                                                                  | 382 | 64.66 (247) | 1.00               |        | 1.00               |       |
| ≥1                                                                                 | 129 | 47.29 (61)  | 0.49(0.33 to 0.74) | 0.001  | 0.48(0.29 to 0.80) | 0.005 |
| Have received voluntary counseling and testing (VCT) service in the past 12 months |     |             |                    |        |                    |       |
| No                                                                                 | 243 | 51.85 (126) | 1.00               |        | 1.00               |       |
| Yes                                                                                | 268 | 67.91 (182) | 1.97(1.37 to 2.81) | <0.001 | 1.71(1.07 to 2.72) | 0.024 |

For eight-month retention, age > 25 years old (AOR = 1.76, 95% CI 1.16 to 2.68, p = 0.008), living in Beijing for more than one year (AOR = 1.68, 95% CI 1.03 to 2.73, p = 0.039), first sexual partner was female (AOR = 0.60, 95% CI 0.41 to 0.88, p = 0.009), ever had group sex (AOR = 0.50, 95% CI 0.28 to 0.89, p = 0.019), and had received lubricant in the past 12 months (AOR = 2.31, 95% CI 1.56 to 3.42, p < 0.001 ) were retained in the final model using stepwise multiple logistic regression analysis (Table 5).

**Table 5 Factors associated with eight-month retention rate in a cohort study of migrant MSM in Beijing, China, using stepwise multiple logistic analysis**

| Factor                                        | N   | Retention rate % (n) | OR (95% CI)        | p Value | Adjusted OR (95% CI) | p Value |
|-----------------------------------------------|-----|----------------------|--------------------|---------|----------------------|---------|
| Age                                           |     |                      |                    |         |                      |         |
| 18-24                                         | 149 | 44.30(66)            | 1.00               |         | 1.00                 |         |
| ≥25                                           | 362 | 57.18(207)           | 1.68(1.14 to 2.47) | 0.008   | 1.76(1.16 to 2.68)   | 0.008   |
| Duration of stay in Beijing                   |     |                      |                    |         |                      |         |
| < 1 year                                      | 78  | 48.72 (38)           | 1.00               |         | 1.00                 |         |
| > 1 year                                      | 338 | 58.88 (199)          | 2.17(1.37 to 3.43) | <0.001  | 1.68 (1.03 to 2.73)  | 0.039   |
| Gender of the first sexual partner            |     |                      |                    |         |                      |         |
| Male                                          | 300 | 58.33 (175)          | 1.00               |         | 1.00                 |         |
| Female                                        | 211 | 46.45 (98)           | 0.62(0.43 to 0.88) | 0.008   | 0.60 (0.41 to 0.88)  | 0.009   |
| Ever had group sex                            |     |                      |                    |         |                      |         |
| NO                                            | 452 | 54.87 (248)          | 1.00               |         | 1.00                 |         |
| YES                                           | 59  | 42.37 (25)           | 0.61(0.35 to 1.05) | 0.072   | 0.50 (0.28 to 0.89)  | 0.019   |
| Have received lubricant in the past 12 months |     |                      |                    |         |                      |         |
| NO                                            | 109 | 34.86 (38)           | 1.00               |         | 1.00                 |         |
| YES                                           | 402 | 58.46 (235)          | 2.59(1.78 to 3.77) | <0.001  | 2.31 (1.56 to 3.42)  | <0.001  |

## DISCUSSION

1  
2  
3 Our study found that the prevalence of HIV (6.58%) among migrant MSM was at a high epidemic level, which was  
4  
5 highlighted in comparison to that of a previous study among migrant general population (0%) in Beijing.<sup>23</sup> Additionally,  
6  
7 it was higher than the 4.8% in 2007 among general MSM in Beijing.<sup>24</sup> A similar result (5.9%) was found in a recent  
8  
9 cross-sectional study among migrant MSM.<sup>23</sup> Incidence in this subgroup (7.83/100PY) was consistent with that of  
10  
11 migrant MSM (8.51/100PY) in a MSM cohort study in Beijing, and higher than the incidence of permanent resident  
12  
13 MSM.<sup>25</sup> It was also higher than the incidence of general MSM in different parts of China.<sup>6, 7</sup>

14  
15  
16  
17  
18 The study found that participants whose first anal intercourse occurred before age 15 had significantly higher risk for  
19  
20 HIV seroconversion. An American study of young minority MSM found that study participants who had an MSM  
21  
22 sexual debut before 16 years old were more likely to have psychological problems and high risk behaviors like  
23  
24 exchanging sex and drug use.<sup>26</sup> Early sexual debut could have a deep and long-term influence on an individual's  
25  
26 developing sexual concept, but appropriate sex education has generally been shunned in traditional Chinese education.  
27  
28  
29  
30 Our study indicated that early sex education should be combined with Chinese characteristics, and relevant measures  
31  
32 need to be implemented as soon as possible. Another risk factor significantly associated with HIV incidence was ever  
33  
34 had group sex. An explanation of this observation is that psychological stress caused by stigma and discrimination  
35  
36 hinders the development of longer-term relationships between MSM,<sup>27</sup> and having sex with multiple partners increases  
37  
38 the chance of HIV transmission. This indicates a need for confidentiality and support services for migrant MSM.  
39  
40  
41  
42  
43 Serious attention should also be paid to the prevalence of STDs. The prevalence rate of syphilis (29.62%) was higher  
44  
45 than those of previous studies conducted among MSM in Beijing, such as 19.8% in 2007,<sup>24</sup> and 22.0% in 2009.<sup>10</sup> The  
46  
47 incidence of syphilis (11.11/100PY) was also at an extremely high level compare to 8.06/100PY in a cohort study  
48  
49 among MSM during the same period in 2009.<sup>25</sup> High prevalence of syphilis among MSM was a common risk factor for  
50  
51 encouraging HIV infection because of the biological and behavioral links between syphilis and HIV.<sup>28</sup>

52  
53  
54  
55  
56 The multiple regression analysis significantly revealed that self-identified bisexuals were five times more likely than  
57  
58  
59  
60

1  
2  
3 homosexuals to be infected with syphilis. One major reason for this outcome could be that bisexuals may have more  
4  
5 varied sexual behaviors with a wider range of sexual partners, including males and females. In addition, a  
6  
7 cross-sectional study among young migrant MSM in Beijing discovered that MSM who were engaged in bisexual  
8  
9 behavior had a higher rate of unprotected sex with stable female partners and were less likely to take part in prevention  
10  
11 behaviors,<sup>18</sup> which was consistent with our finding that those who had at least one female sex partner and those whose  
12  
13 first sexual partner was female were significantly more likely to be lost at four-month and eight-month follow-up visits,  
14  
15 respectively. MSM face strong social pressure and stigma in China, which may lead them to hide their sexual  
16  
17 orientation by unwillingly engaging in heterosexual relationships; thus, many Chinese MSM will potentially enter a  
18  
19 heterosexual marriage due to social and familial pressure,<sup>4</sup> Concerned about disclosing their MSM behavior to their  
20  
21 female partners, bisexual MSM may be more reluctant to be followed up. Also, bisexual MSM are more likely to  
22  
23 engage in risk behaviors, such as having unprotected sex to indicate loyalty to their female partners and having  
24  
25 commercial or casual sex with men. Moreover, only 18.4% of the participants reported having received an examination  
26  
27 or treatment for sexually transmitted diseases in the past 12 months, which may be related to the high cost of health  
28  
29 services and low coverage of health insurance for the migrant population.<sup>18</sup> Low risk-awareness might be another  
30  
31 reason for their lower access to HIV/STD test and treatment. All of these emphasize an urgent need for widespread and  
32  
33 accurate syphilis screening and affordable treatment for migrant MSM in Beijing.  
34  
35  
36  
37  
38  
39  
40  
41  
42

43 In our study, the retention rate was lower than in previous cohort studies implemented among general MSM in Beijing  
44  
45 (86.2% in 2007, 86.8% in 2009).<sup>25,26</sup> From the multiple regression analysis, participants who were less than 25 years  
46  
47 old were more likely to be lost at both four-month and eight-month follow-up visits. Similar problems have occurred  
48  
49 among studies of young MSM in the US.<sup>29</sup> A plausible reason for this observation was that many young people in China  
50  
51 have poor knowledge of safe sexual behaviors. Traditional interventions are more pragmatic but less attractive and  
52  
53 appropriate for young people. A qualitative investigation implemented among young MSM in Milwaukee and Detroit  
54  
55  
56  
57  
58  
59  
60

1  
2  
3 offered some new approaches, such as embedding HIV prevention efforts in the context of broader life and relationship  
4  
5 issues facing young MSM.<sup>30</sup> As differences almost certainly exist between young Chinese and American MSM,  
6  
7 predictors of retention among young MSM in Beijing deserve further investigation.  
8  
9

10 As for positive predictors, we found those who had been in Beijing for more than one year or who had received  
11  
12 lubricant were more likely to be maintained in this cohort at both four-month and eight-month follow-up visits. As these  
13  
14 services are provided by local communities, we found similar results as those in Yangzhou.<sup>8</sup> Migrant MSM who stay  
15  
16 longer in Beijing may have more chances to receive effective and stable intervention services, and the potential impact  
17  
18 on their increasing awareness of self-protection might encourage them to pay closer attention to advances in research.  
19  
20 As a result, migrants may be more likely to remain with the investigation to show their support. However, the data  
21  
22 showed that receiving voluntary counseling and testing (VCT) service in the past 12 months was a positive factor at  
23  
24 four-month follow-up visit, which was replaced by receiving lubricant at eight-month visit. This indicate that factors  
25  
26 associated with retention rate may change as time goes on. In other words, different factors may have a unique impact  
27  
28 on retention rate in different periods, which implies that we should adjust methods for interventions over time so as to  
29  
30 keep the entire cohort more stable. From the results of our study, the coverage of intervention on this population was  
31  
32 limited. Aimed at the mobility problem inherent to migrant populations, a specific strategy of intervention targeted at  
33  
34 migrant MSM is imminently needed.  
35  
36  
37

38 This study has a number of limitations. Firstly, retention rates were relatively low, which means that the estimates of  
39  
40 HIV/syphilis seroconversions may be biased because no evidence showed a balance between participants retained in  
41  
42 the study and those lost to follow-up. Secondly, using non-random sampling methods may have led to selection bias.  
43  
44 Thirdly, the sample size was insufficient, and some potentially relevant factors may be concealed by the small sample  
45  
46 size. Lastly, the study subjects were all inflow population and did not include outflow population, and the proportion of  
47  
48 migrants from different provinces varied. There is no evidence to show the data could be generalized to other regions.  
49  
50  
51  
52  
53  
54  
55  
56  
57  
58  
59  
60

1  
2 To our knowledge, this is the first cohort study to assess incidence of HIV and syphilis among migrant MSM in Beijing.  
3  
4  
5 With highly prevalent risk behaviors, the migrant MSM had a high level of HIV incidence, and the epidemic of syphilis  
6  
7 among this subgroup was extremely serious. Bisexual MSM were at a high risk of syphilis seroconversion, and were  
8  
9 more concealed among migrant MSM. Future prevention efforts should include screening and appropriate treatment for  
10  
11 syphilis. Multiple modes of intervention services need to be improved and implement for this marginalised group. For  
12  
13 the sake of bisexual MSM's health, as well as for their partners', more attention need to be paid on female partners of  
14  
15 bisexual MSM to encourage them to take test and be followed-up. A greater understanding of risk behaviors and the  
16  
17 HIV/STD epidemic among migrant MSM needs to be investigated in the future.  
18  
19  
20  
21  
22  
23  
24  
25  
26  
27  
28  
29  
30  
31  
32  
33  
34  
35  
36  
37  
38  
39  
40  
41  
42  
43  
44  
45  
46  
47  
48  
49  
50  
51  
52  
53  
54  
55  
56  
57  
58  
59  
60



## ACKNOWLEDGEMENTS

This work was supported in part by Natural Science Foundation of China (81001288, 11171268), National S&T Major Project Foundation of China (No. 2012ZX10001-001 and No. 2011ZX10004-902), Priority Academic Program Development of Jiangsu Higher Education Institutions (PAPD).

The funders had no role in study design, data collection and analysis, decision to publish, or preparation of the manuscript.

## CONTRIBUTORS

ZP, RY and NW conceived and designed the experiments, HL and LW performed the experiments, HM and WM analyzed the data, HZ and YZ contributed reagents/materials/analysis tools, HM, WM and ZP wrote the paper, and all authors read and approved the final version of the manuscript.

## COMPETING INTERESTS

The authors have no conflict of interest to declare.

## Data sharing statement

Extra data is available by emailing [zhihangpeng@njmu.edu.cn](mailto:zhihangpeng@njmu.edu.cn).

## REFERENCES

1. Jia Z, Wang L, Chen R Y, *et al.* Tracking *the* evolution of HIV/AIDS in China from 1989–2009 to inform future prevention and control efforts. *PLoS One* 2011; **6**: e25671.
2. National Center for STD/AIDS Prevention and Control, Chinese Center for Disease Prevention and Control, *Epidemic of HIV/AIDS and sexual transmitted diseases and main progression on prevention in 2011, China.* Beijing: Chinese Center for Disease Control and Prevention, 2012.
3. Ministry of Health of the People’s Republic of China, UNAIDS, WHO. *National report for HIV/AIDS estimation in China, 2011.* Beijing: Chinese Center for Disease Control and Prevention, 2011.
4. Chow EPF, Lau JTF, Zhuang X, *et al.* HIV Prevalence Trends, Risky Behaviours, and Governmental and Community Responses to the Epidemic among Men Who Have Sex with Men in China. *BioMed research international* 2014;**2014**:607261.
5. Lu F, Fu J, Zhang R, *et al.* Analysis of HIV epidemic situation and immigrant population. *Infect Dis Info* 2006;**19**:259-61.
6. Xu J, An M, Han X, *et al.* Prospective cohort study of HIV incidence and molecular characteristics of HIV among men who have sex with men(MSM) in Yunnan Province, China. *BMC Infect Dis* 2013;**13**:3.
7. Xu J, Zhang M, Brown K, *et al.* Syphilis and HIV seroconversion among a 12-month prospective cohort of men who have sex with men in Shenyang, China. *Sex Transm Dis* 2010;**37**:432-9.
8. Peng Z, Yang H, Norris J, *et al.* HIV Incidence and Predictors Associated with Retention in a Cohort of Men Who have Sex with Men in Yangzhou, Jiangsu Province, China. *PloS One* 2012;**7**:e52731.
9. Yang H, Tang W, Xiao Z, *et al.* Worsening Epidemic of HIV and Syphilis Among Men Who Have Sex With Men in Jiangsu Province, China. *Clin Infect Dis* 2014;**58**:1753-9.

10. Fan S, Lu H, Ma X, *et al.* Behavioral and serologic survey of men who have sex with men in Beijing, China: implication for HIV intervention. *AIDS Patient Care STDS* 2012;**26**:148-55.
11. Feng L, Ding X, Lu R, *et al.* High HIV prevalence detected in 2006 and 2007 among men who have sex with men in China's largest municipality: An alarming epidemic in Chongqing, China. *J Acquir Immune Defic Syndr* 2009;**52**:79-85.
12. Berg CJ, Nehl EJ, Wong FY, *et al.* Prevalence and correlates of tobacco use among a sample of MSM in Shanghai, China. *Nicotine Tob Res* 2011;**13**:22-8.
13. Liu H, Yang H, Li X, *et al.* Men who have sex with men and human immunodeficiency virus/sexually transmitted disease control in China. *Cell Res* 2005;**15**:858.
14. Lau JT, Wang M, Wong HN, *et al.* Prevalence of bisexual behaviors among men who have sex with men (MSM) in China and associations between condom use in MSM and heterosexual behaviors. *Sex Transm Dis* 2008;**35**:406-13.
15. He N, Wong FY, Huang ZJ, *et al.* HIV risks among two types of male migrants in Shanghai, China: money boys vs. general male migrants. *AIDS* 2007;**21**:S73-9.
16. Yang X, Derlega VJ, Luo H. Migration, behaviour change and HIV/STD risks in China. *AIDS Care* 2007;**19**:282-8.
17. Yang X. Temporary migration and HIV risk behaviors in China. *Environment and Planning A* 2006;**38**:1527.
18. Peng Y, Chang W, Zhou H, *et al.* Factors associated with health-seeking behavior among migrant workers in Beijing, China. *BMC Health Serv Res* 2010;**10**:69.
19. Shi TX, Zhang BC, Li XF, *et al.* Study on the high risk behaviors related to AIDS among men who having sex with men in the floating population. *Chin J Epidemiol* 2009;**30**:668.
20. Newly reported HIV/AIDS cases increase 24.3% per year in Beijing. Retrieved from <http://>

- 1  
2  
3 [health.sina.com.cn/news/2013-11-29/0921114941.shtml](http://health.sina.com.cn/news/2013-11-29/0921114941.shtml) (accessed 31 May 2014).  
4  
5  
6 21. Wang B, Li X, Stanton B, *et al.* Socio-demographic and behavioral correlates for HIV and syphilis infections  
7 among migrant men who have sex with men in Beijing, China. *AIDS Care* 2013;**25**:249-57.  
8  
9  
10 22. Guo Y, Li X, Song Y, *et al.* Bisexual behavior among Chinese young migrant men who have sex with men:  
11 implications for HIV prevention and intervention. *AIDS Care* 2012;**24**:451-8.  
12  
13  
14 23. Xia DY, Lu HY, Liu GW, *et al.* Prevalence of HIV infection, syphilis, HCV and risk behaviors among migrant  
15 population in Beijing. *Chin J AIDS STD* 2011;**17**:430-3.  
16  
17  
18  
19 24. Ruan Y, Luo F, Jia Y, *et al.* Risk factors for syphilis and prevalence of HIV, hepatitis B and C among men who  
20 have sex with men in Beijing, China: implications for HIV prevention. *AIDS Behav* 2009;**13**:663-70.  
21  
22  
23  
24 25. Li D, Li S, Liu Y, *et al.* HIV incidence among men who have sex with men in Beijing: a prospective cohort study.  
25  
26 *BMJ Open* 2012;**2**:e001829.  
27  
28  
29  
30 26. Outlaw AY, Phillips G, Hightow-Weidman LB, *et al.* Age of MSM sexual debut and risk factors: results from a  
31 multisite study of racial/ethnic minority YMSM living with HIV. *AIDS Patient Care STDS* 2011;**25**:S23-9.  
32  
33  
34  
35 27. Neilands TB, Steward WT, Choi KH. Assessment of stigma towards homosexuality in China: a study of men who  
36 have sex with men. *Arch Sex Behav* 2008;**37**:838-44.  
37  
38  
39  
40 28. Guo H, Wei JF, Yang H, *et al.* Rapidly increasing prevalence of HIV and syphilis and HIV-1 subtype  
41 characterization among men who have sex with men in Jiangsu, China. *Sex Transm Dis* 2009; **36**:120-125.  
42  
43  
44  
45 29. Galvin SR, Cohen MS. The role of sexually transmitted diseases in HIV transmission. *Nat Rev Microbiol*  
46 2004;**2**:33-42.  
47  
48  
49  
50 30. Hightow-Weidman LB, Jones K, Wohl AR, *et al.* Early linkage and retention in care: findings from the outreach,  
51 linkage, and retention in care initiative among young men of color who have sex with men. *AIDS Patient Care*  
52 *STDS* 2011;**25**:S31-8.  
53  
54  
55  
56  
57  
58  
59  
60

1  
2  
3 **Figure legend:**  
4

5 Figure 1. Study flowchart of the migrant MSM cohort, with focus on the HIV and syphilis incidence  
6  
7  
8  
9  
10  
11  
12  
13  
14  
15  
16  
17  
18  
19  
20  
21  
22  
23  
24  
25  
26  
27  
28  
29  
30  
31  
32  
33  
34  
35  
36  
37  
38  
39  
40  
41  
42  
43  
44  
45  
46  
47  
48  
49  
50  
51  
52  
53  
54  
55  
56  
57  
58  
59  
60

For peer review only

1  
2  
3  
4  
5  
6  
7  
8  
9 **High Incidence of HIV and syphilis among Migrant Men Who have Sex with**  
10 **Men in Beijing, China: A Prospective Cohort Study**  
11

Formatted: Font: (Default) Times New Roman

Formatted: Line spacing: Double

12 **Hengyi Mao<sup>1#</sup>, Wenzhe Ma<sup>1#</sup>, Hongyan Lu<sup>2</sup>, Lu Wang<sup>3</sup>, Hui Zheng<sup>1</sup>, Yingying Zhu<sup>1</sup>, Zhihang Peng<sup>1\*</sup>,**  
13  
14 **Rongbin Yu<sup>1</sup>, Ning Wang<sup>3\*</sup>**

- 15  
16  
17  
18  
19  
20  
21  
22  
23 1. Department of Epidemiology & Biostatistics, School of Public Health, Nanjing Medical University,  
24 Nanjing, China;  
25  
26 2. Department of STDs/AIDS Prevention and Control, Beijing Center for Disease Prevention and Control, Beijing,  
27 China;  
28  
29 3. National Center for AIDS/STD Control and Prevention, Chinese Center for Disease Control and Prevention,  
30 Beijing, China.  
31  
32

33  
34  
35 #These authors contributed equally to this work

36  
37 \*Corresponding author

38  
39 Postal address: 818th east Tianyuan Road, Nanjing, China;

40  
41 E-mail: zhihangpeng@njmu.edu.cn; wangning\_12@126.com

42  
43 Tel: 86-25-86868436;

44  
45 Fax: 86-25-86868499.

46  
47  
48  
49  
50  
51  
52 **Keywords:** HIV; syphilis; male homosexuality; cohort study; China  
53  
54  
55  
56  
57  
58  
59  
60

Word Count: 32263490

## ABSTRACT

**Objectives:** The purpose of the study was to investigate the incidence of HIV and syphilis and their related factors, as well as to examine the predictors associated with seroconversion among migrant men who have sex with men in Beijing, China.

**Design:** Prospective cohort study.

**Setting:** YunnanBeijing, China.

**Participants:** 511 HIV-negative migrant MSM.

**Primary and secondary outcome measures:** Sociodemographic and behavioral information of participants, HIV and syphilis incidence rates, and factors associated with HIV/syphilis seroconversion and cohort retention.

**Results:** Of the 511 participants, 60.3% (308) and 52.4% (273) were retained at the four-month and eight-month follow-up visits, respectively. The HIV and syphilis incidence rates were 7.83 (95% CI 4.48 to 12.72) and 11.11 (95% CI 6.47 to 17.80) cases per 100 person-years, respectively. HIV seroconversion was significantly associated with having had first anal intercourse at age 15 or younger (adjusted hazard ratio (aHR) = 9.20, 95% CI 1.94 to 43.56) and ever had group sex (aHR = 4.30, 95% CI 1.40 to 13.18). Bisexual orientation (aHR = 5.09, 95% CI 1.02 to 25.57) was significantly associated with syphilis seroconversion. Predictors associated with both four-month and eight-month retention rates included age  $\geq$  25 years old and living in Beijing for more than one year.

**Conclusions:** The high incidence of HIV and syphilis among migrant MSM are cause for concern. A comprehensive strategy should be implemented to maintain a higher retention rate among migrant MSM.

### Strengths and limitations of this study

- First cohort study to assess incidence of HIV and syphilis among migrant MSM in Beijing.

Formatted: Font: Not Bold

- Cox regression analysis and stepwise multiple logistic regression were used to identify factors associated with HIV/syphilis seroconversion and cohort retention, respectively.
- Retention rates were relatively low, which means that the estimates of HIV/syphilis seroconversions may be biased because no evidence showed a balance between those retained in the study and those lost to follow-up.
- Sampling methods may have led to selection bias.
- No outflow population was included, and the proportions of migrants from different provinces varied, which ~~lead~~ may lead to ~~difficulty~~ difficulties of with generalization of the data.

## INTRODUCTION

In China ~~during the last decade~~, sexual transmission has become the major route for HIV transmission ~~in the last decade~~.<sup>[14]</sup> As an increasing proportion of ~~infections among~~ people living with HIV/AIDS (PLWHA), cases attributed to ~~homosexual transmission~~ rose from 7.3% in 2005 to ~~11.1%~~ 16.1% in ~~2007~~ 2011.<sup>[15]</sup> The 2011 HIV epidemic assessment report showed that among the estimated 780,000 people living with HIV/AIDS, ~~homosexual contact~~ ~~transmission~~ accounted for 17.4% of infections, ~~with~~ an increase from 14.7% in 2009.<sup>[16]</sup> A growing number of studies have revealed the upward trend of HIV ~~prevalence~~ ~~incidence~~ among MSM in different parts of China. For example, ~~the prevalence~~ ~~incidence~~ increased ~~from 8.0 to 15.4 per 100 person-years during 2006–2009~~ ~~from 10.4% in 2006 to 12.5% in 2007~~ in Chongqing,<sup>[17]</sup> ~~from 5.1 to 10.2 per 100 person-years during 2007–2009~~ in Liaoning ~~from 0.4% in 2004 to 5.8% in 2006~~ in Beijing,<sup>[18]</sup> ~~and from 5.7 to 8.2 per 100 person-years during 2008–2011~~ in Jiangsu ~~from 5.7% in 2007 and 6.2% in 2008~~ to 8.1% in 2009 in Shenyang ~~and from 3.5 to 6.3 per 100 person-years during 2010–2012~~ in Zhejiang.<sup>[19]</sup>

In recent years, there ~~is~~ ~~has been~~ growing awareness that internal migration within China may be shifting the HIV epidemic by broadening social ~~mixing~~ ~~integration~~ ~~accompanied by sexual mixing between~~ ~~communities among and~~ ~~combining~~ ~~connecting~~ ~~populations from different regions by~~ ~~through~~ sexual ~~activities~~ ~~networks~~.<sup>[11]</sup> Data from national

Formatted: Superscript

Formatted: Superscript



1  
2  
3  
4  
5  
6  
7 behavioral surveillance during 2004-2005 showed that migrant HIV/AIDS cases accounted for more than 50% of total  
8  
9 infections in nine ~~different-mainland~~ provinces.<sup>†65‡</sup> ~~Numbers of cohort study on MSM have been implemented in China~~  
10 ~~to reveal HIV epidemic among MSM, however the retentions of MSM were not so high in most of them. Retentions of~~  
11 ~~these cohort studies can hardly maintain over 70% at 12-months follow-up, few of them even below 20%.<sup>6-9</sup> There are~~  
12 ~~reasons for low retention rates, and migration of MSM may be an important one.<sup>8</sup> Moreover, studies implemented~~  
13  
14 among ~~urban~~ MSM ~~in metropolises~~ also revealed a high proportion of migrants among MSM ~~in major cities~~, such as in  
15  
16 Beijing (88%),<sup>†710‡</sup> Chongqing (80.3%)<sup>†11‡</sup> and Shanghai (79.7%).<sup>†812‡</sup> Although migration itself does not spread HIV ~~and~~  
17  
18 ~~or~~ other sexually transmitted diseases (STDs), it may increase the possibility of infection when combined with high risk  
19  
20 behaviors, which are prevalent among MSM. It has been confirmed in numerous studies that high risk behaviors such  
21  
22 as unprotected anal sex, commercial sex, group sex, casual sex and having multiple sexual partners ~~were are~~ prevalent  
23  
24 among MSM in China.<sup>†913-†15‡</sup> On the other hand, perceived stigma and discrimination due to traditional Chinese  
25  
26 culture and conservative social values have increasingly led Chinese MSM to disguise their sexual orientation with  
27  
28 matrimony, which leads to a potential risk of transmitting HIV to the general population via heterosexual transmission.  
29  
30  
31  
32  
33  
34  
35 ~~†914‡~~ As for migrants, ~~without the lacking the~~ stability of a family or a home community ~~and with but and with~~  
36  
37 ~~generally~~ low educational levels, limited knowledge ~~about of~~ HIV/AIDS prevention, and discrimination and  
38  
39 marginalization from the mainstream metropolitan society, high risk behaviors may ~~happen occur~~ more frequently.<sup>†1216‡</sup>  
40  
41  
42  
43  
44  
45  
46  
47  
48  
49  
50  
51  
52  
53  
54  
55  
56  
57  
58  
59  
60

1  
2  
3  
4  
5  
6  
7 Beijing, the capital of China and a center of political, economic and cultural activity, is a magnet for the migrant  
8  
9 population. In ~~2009~~2012, Beijing's metropolitan population included some ~~72.67.7~~ million migrants, ~~and with the~~  
10 migrant population ~~accounted-accounting~~ for ~~7037.4%~~ of the ~~total~~ population ~~of Beijing-increase from 2006 to 2009~~  
11  
12 (China National Bureau of Statistics, ~~2009~~2013). According to statistics from the Beijing Municipal Bureau of Health,  
13  
14 ~~the proportion of MSM in HIV/AIDS cases had-increased from 22.8% in 2006 to 69.1% at the end of October-~~ 2013.  
15  
16 ~~4722 (73.98%) HIV/AIDS cases from the cumulative data were from Chinese provinces, and 44% of the 501 new~~  
17  
18 ~~HIV/AIDS cases in the first five months of 2009 were among male homosexuals.~~<sup>††620†</sup> In addition, prior research  
19  
20 among MSM in Beijing revealed that with the increasing epidemic of HIV among MSM in recent years, the number of  
21  
22 migrants among recruited participants also showed a remarkable upward trend.<sup>††-710, 11†</sup> This phenomenon implies  
23  
24 ~~that~~the following: (1) migrant MSM play a main role in ~~the~~ MSM ~~sphere-society~~ in Beijing; (2) this marginal  
25  
26 population emerged gradually with the constant improvement of sampling methods; and (3) more targeted studies of  
27  
28 this subpopulation are urgently needed, while at present only a few cross-sectional studies have been conducted to  
29  
30 investigate its HIV/STD infections and relative risk factors.<sup>††72†, 1822†</sup> Thus, the purpose of this research was to assess  
31  
32 the incidence of HIV and syphilis and examine the predictors associated with seroconversion and retention in a  
33  
34 prospective cohort study among migrant MSM in Beijing, China.  
35  
36  
37  
38  
39  
40

## 41 METHODS

### 42 Study Design and Study Population

43  
44 This prospective cohort study was conducted in Beijing, ~~the capital of China~~. Participants were ~~all Chinese citizens and~~  
45  
46 ~~were~~ recruited through three methods. First, study participants were recruited directly through website advertisements  
47  
48 by a nongovernmental AIDS volunteer group (<http://www.hivolunt.net>). Second, peer recruiters were hired and trained  
49  
50 to distribute flyers with study-related information at MSM-frequented venues (e.g., MSM clubs, bars, parks and  
51  
52  
53  
54

1  
2  
3  
4  
5  
6  
7 bathhouses). Thirdly, study participants were encouraged to refer their peers to enroll in the study. Once a potential  
8 participant had been referred or identified, local research team members approached the individual to verify eligibility,  
9 which included age  $\geq 18$  years old, male individual, HIV-negative, had sex with another male in the past 12 months,  
10 which included age  $\geq 18$  years old, male individual, HIV-negative, had sex with another male in the past 12 months,  
11 which included age  $\geq 18$  years old, male individual, HIV-negative, had sex with another male in the past 12 months,  
12 which included age  $\geq 18$  years old, male individual, HIV-negative, had sex with another male in the past 12 months,  
13 which included age  $\geq 18$  years old, male individual, HIV-negative, had sex with another male in the past 12 months,  
14 which included age  $\geq 18$  years old, male individual, HIV-negative, had sex with another male in the past 12 months,  
15 which included age  $\geq 18$  years old, male individual, HIV-negative, had sex with another male in the past 12 months,  
16 which included age  $\geq 18$  years old, male individual, HIV-negative, had sex with another male in the past 12 months,  
17 and 1262 were syphilis-positive. In consideration of the curability and repeatability of syphilis infection, participants  
18 who were syphilis-positive at baseline were still recruited in the cohort. Thus a total of 511 eligible and consenting  
19 MSM were enrolled into the prospective cohort, of whom 141 were syphilis-positive. Participants were followed up for  
20 four and eight months after the baseline survey. At each study visit (baseline, four-month follow-up and eight-month  
21 follow-up), eligible participants were interviewed by trained health professionals in a private room of the study clinic,  
22 and blood plasma specimens were collected and analyzed for HIV and syphilis antibodies by experienced physicians.  
23 One week later, each participant received their test results anonymously by a private identification code. All participants  
24 who tested positive for HIV/syphilis received additional posttest counseling and referrals to relevant free services.  
25 Every participant received 50 RMB (7.4 USD), 12 free condoms and one free lubricant after each completed study visit.  
26 Every participant was asked to provide at least two different and current contact methodwaysmethods, and reminder  
27 calls were made before the follow-up day to verify that the exact time of the visit would be convenient for them. The  
28 study protocol and informed consent forms were approved by the Institutional Review Boards of the National Center  
29 for AIDS/STD Control and Prevention of the China Center for Disease Control and Prevention (Figure 1).

#### 47 Data Collection and Laboratory Tests

48 Questionnaire-based interviews were conducted on a one-on-one basis in a separate private room of the district clinic.  
49 Data on demographics, sexual behavior and history of sexually transmitted diseases (STDs) were collected.

1  
2  
3  
4  
5  
6  
7 Participants' questionnaires and blood specimens were linked through assignment of a unique identifier code in the  
8  
9 follow-up visits.

10  
11 Blood specimens were tested for HIV and syphilis infections. The HIV infection status was screened by an ELISA  
12  
13 (InTec Products Company, Xiamen, China) screening, and confirmed by an HIV-1/2 Western Blot (HIV Blot 2.2  
14  
15 WBTM, Genelabs Diagnostics, Singapore). Syphilis infection was determined by a rapid plasma reagin (RPR) test  
16  
17 (Shanghai Rongsheng, Shanghai, China), and confirmed using Treponema pallidum particle assay (TPPA) test  
18  
19 (Fujirebio Inc, Tokyo, Japan).

#### 20 21 22 23 24 **Statistical Analysis**

25  
26 Questionnaire data were double-entered and then checked for accuracy using Epi-Data software (The Epi-Data  
27  
28 Association, Odense, Denmark, version 3.1). Data were analyzed using Stata/SE (StataCorp LP, USA, version 12.0 for  
29  
30 Windows). HIV seroconversion was estimated to have occurred at the midpoint between the time of baseline HIV test  
31  
32 and the time of the follow-up HIV test with a seropositive result. ~~In consideration of the curability and repeated ability~~  
33  
34 ~~infection of syphilis infection, participants who had negative seroconversion during follow-up period continued to be~~  
35  
36 ~~retain regarded as negative object of observation. Thus~~ Syphilis seroconversion was estimated to have occurred at the  
37  
38 ~~midpoint halfway point~~ between the ~~time of a confirmed seronegative and the time of a confirmed seropositive previous~~  
39  
40 ~~visit and the visit where seroconversion occurred.~~ HIV/syphilis incidence density was calculated based on a Poisson  
41  
42 distribution, with number of seroconversion incidents within the follow-up period as the numerator and person-years  
43  
44 (PY) over the entire follow-up period as the denominator. Categorical factors associated with retention rate were  
45  
46 analyzed by univariate logistic regression, including baseline demographic and behavioral characteristics. A stepwise  
47  
48 multiple logistic regression (out 0.05, in 0.02) was used to select independent factors for the retention rate. A Cox  
49  
50 regression model was used in univariate and multiple regression analyses to identify correlates of time to HIV  
51  
52  
53  
54  
55  
56  
57  
58  
59  
60

seroconversion. Statistically significant variables in univariate analysis ( $P < 0.10$ ) were entered simultaneously into a multivariate Cox proportional hazard regression model to determine the adjusted hazard ratio (aHR) for HIV/syphilis seroconversion-related risk factors.

## RESULTS

### Baseline Characteristics of the Participants

~~A total of 547 participants were screened at baseline; 36 (6.58%) were HIV antibody seropositive and syphilis prevalence was 29.62%. Finally, 511 participants were HIV seronegative and eligible to continue the study. Of them, 27.59% were syphilis seropositive.~~

Of 511 participants, the median age was 29 years; 94.32% belonged to the Han ethnic group; 64.77% were single, 22.90% were married or cohabiting, and 12.33% were separated or divorced or widowed. For education level, 73.19% had received a high school education or lower. About half (54.01%) had monthly incomes < 300US\$. Participants who identified themselves as exclusively homosexual or bisexual accounted for 60.67% and 37.57%, respectively. A total of 16.05% and 44.03% of the participants thought it was impossible or improbable they would be infected with HIV, respectively. The median age of sexual debut was 20 years, and 58.71% experienced their sexual debut with a male. The median age of first anal intercourse was 22, and 58.65% of ~~them~~ participants did not use a condom at first anal intercourse. In the past year, 78.67% of the participants had ever received condoms, 65.17% had ever received lubricant, 23.68% had ever taken part in peer education, 18.40% had ever received examination or treatment for STDs and 52.49% had ever received voluntary counseling and testing services (VCTs).

Regarding behaviors in the past six months among participants, the median number of male sex partners was three. For high risk behaviors, 327 (63.99%) had oral sex with male sex partners, 22 (6.73%) of them had consistent condom use with regular sex partners, and 26 (7.95%) with casual partners; 511 (100%) had anal sex with male sex partners,

**Formatted:** Indent: First line: 0 ch, Widow/Orphan control, Adjust space between Latin and Asian text, Adjust space between Asian text and numbers

13.11% of them had consistent condom use with regular sex partners, and 66 (18.70%) with casual partners. A total of 61 (11.94%) participants had ever engaged in commercial sexual behavior, among whom 35 (57.38%) had paid for sex and 43 (70.49%) had received money for sex. A total of 59 (11.55%) had ever engaged in group sex, which happened almost exclusively (96.61%) among males. A total of 166 (32.49%) had ever engaged in sex under the influence of alcohol, among whom 152 (92.77%) had homosexual intercourse while intoxicated (Table 1).

**Table 1** Sociodemographic characteristics of the 547 study participants in the cohort of migrant MSM in Beijing

| Variables                                  | n   | %     |
|--------------------------------------------|-----|-------|
| Overall, N                                 | 547 | 100   |
| Age (median, years)                        | 29  | -     |
| 18-24                                      | 149 | 29.16 |
| ≥25                                        | 362 | 70.84 |
| Ethnicity                                  |     |       |
| Han                                        | 482 | 94.32 |
| Minority                                   | 29  | 5.68  |
| Marital status                             |     |       |
| Single                                     | 331 | 64.77 |
| Married                                    | 114 | 22.31 |
| Cohabiting with male or female sex partner | 3   | 0.59  |
| Separated or divorced or widowed           | 63  | 12.33 |
| Duration of stay in Beijing                |     |       |
| ≤ 1 year                                   | 173 | 33.85 |
| ≥ 1 year                                   | 338 | 66.14 |
| Education level                            |     |       |
| High school and below                      | 374 | 73.19 |
| College and above                          | 137 | 26.81 |
| Monthly income (US\$)                      |     |       |
| < 300                                      | 276 | 54.01 |
| ≥ 300                                      | 235 | 45.99 |
| Self-reported sexual orientation           |     |       |
| Homosexual                                 | 310 | 60.67 |
| Heterosexual                               | 8   | 1.57  |
| Bisexual                                   | 192 | 37.57 |
| Other                                      | 1   | 0.2   |
| Self-reported risk of HIV infection        |     |       |
| Impossible                                 | 82  | 16.05 |
| Improbable                                 | 225 | 44.03 |
| Possible                                   | 74  | 14.48 |

Formatted: Font: Times New Roman

Formatted: Font: (Default) Times New Roman

|                                                                                          |            |              |
|------------------------------------------------------------------------------------------|------------|--------------|
| Probable                                                                                 | 15         | 2.94         |
| No idea                                                                                  | 115        | 22.5         |
| Age of sexual debut (median, years)                                                      | 20         |              |
| Gender of first sexual partner                                                           |            |              |
| Male                                                                                     | 300        | 58.71        |
| Female                                                                                   | 211        | 41.29        |
| Age of first anal intercourse (median, years)                                            | 22         |              |
| <u>Had first anal intercourse before 15 years old</u>                                    | <u>13</u>  | <u>2.54</u>  |
| <u>Number of male sex partners in the last 6 months (median)</u>                         | <u>3</u>   |              |
| Number of female sex partners in the last 6 months (median)                              | 0          |              |
| Oral sex with regular partners with <u>a</u> -consistent condom use in the past 6 months | 22         | 6.73         |
| Oral sex with casual partners with <u>a</u> -consistent condom use in the past 6 months  | 26         | 7.95         |
| Anal sex with regular partners with <u>a</u> -consistent condom use in the past 6 months | 67         | 13.11        |
| Anal sex with casual partners with <u>a</u> -consistent condom use in the past 6 months  | 66         | 18.7         |
| Ever had commercial sexual behavior                                                      | 61         | 11.94        |
| Ever had group sex                                                                       | 59         | 11.55        |
| Alcohol use prior to sex                                                                 | 166        | 32.49        |
| <u>Ever had sexually transmitted diseases (STDs)</u>                                     | <u>84</u>  | <u>16.44</u> |
| <u>Have ever received condoms</u>                                                        | <u>402</u> | <u>78.67</u> |
| Have ever received lubricant                                                             | 333        | 65.17        |
| Have ever received peer education                                                        | 121        | 23.68        |
| Have ever received examination or treatment for STD                                      | 94         | 18.4         |
| Have ever received voluntary counseling and testing (VCT) services                       | 268        | 52.45        |
| Have ever received educational materials on AIDS/STD                                     | 302        | 59.1         |

MSM, men who have sex with men; STD, sexually transmitted disease.

### Incidence of infections of HIV, syphilis, HIV-syphilis co-infection and factors predicting HIV and syphilis seroconversion

During the eight-month follow-up, 16 HIV seroconversions were observed over 204.27 person-years of observation, resulting in an incidence rate of 7.83 per 100 person-years (PY) (95% CI 4.48 to 12.72). At the four-month visit, the incidence of HIV was 8.33 per 100 PY (95% CI 3.81 to 15.81) and at the eight-month visit it was 3.83 per 100 PY (95% CI 1.54 to 7.89). During the eight-month follow-up period, syphilis incidence was 11.11 per 100 PY (95% CI 6.47 to 17.80). At the four-month and eight-month visits, the syphilis incidence was 10.03 per 100 PY (95% CI 4.33 to 19.76) and 15.25 per 100 PY (95% CI 6.97 to 28.94), respectively (Table 2). Six HIV seroconversions were observed over 52.10 person-years of becoming syphilis-positive over 52.10 person-years observation, resulting in an incidence of







|                                                                                                                |    |        |       |                    |       |
|----------------------------------------------------------------------------------------------------------------|----|--------|-------|--------------------|-------|
| YES                                                                                                            | 8  | 92.58  | 8.64  | -                  |       |
| Consistent condom use during aAnal sex with regular partners with a consistent condom use in the past 6 months |    |        |       |                    |       |
| NO                                                                                                             | 2  | 24.52  | 8.16  | 1.00               |       |
| YES                                                                                                            | 15 | 128.43 | 11.68 | 0.57(0.11 to 2.80) | 0.485 |
| Consistent condom use during aAnal sex with casual partners with a consistent condom use in the past 6 months  |    |        |       |                    |       |
| NO                                                                                                             | 0  | 19.80  | 0     | 1.00               |       |
| YES                                                                                                            | 11 | 83.21  | 13.22 | -                  |       |

Formatted: Font: Times New Roman

**Predictors of cohort retention**

Of the 511 participants, 60.3% (308) were retained in the cohort at the four-month follow-up and 54.6% (274) were retained at the eight-month follow-up.

Univariate factors among baseline characteristics which were significantly associated with four-month retention were analysed with stepwise multiple logistic regression. Four factors were kept in the final model, including age > 25 years old (adjusted odds ratio (AOR) = 1.81, 95% CI 1.07 to 3.06, p = 0.026), living in Beijing for more than one year (AOR = 3.68, 95% CI 2.04 to 6.64, p < 0.001), had at least one female sex partners in the last six months (AOR = 0.48, 95% CI 0.29 to 0.80, p=0.005), and had ever received VCTs in the past 12 months (AOR =1.71, 95% CI 1.07 to 2.72, p<0.024) (Table 4).

**Table 4 Factors associated with four-month retention rate in a cohort study of migrant MSM in Beijing, eChina, using stepwise multiple logistic analysis**

| Factor                                                                                    | N   | Retention rate % (n) | OR (95% CI)        | p Value | Adjusted OR (95% CI) | p Value |
|-------------------------------------------------------------------------------------------|-----|----------------------|--------------------|---------|----------------------|---------|
| <b>Age</b>                                                                                |     |                      |                    |         |                      |         |
| 18-24                                                                                     | 149 | 46.98(70)            | 1.00               |         | 1.00                 |         |
| ≥25                                                                                       | 362 | 65.75(238)           | 2.17(1.47 to 3.19) | <0.001  | 1.81(1.07 to 3.06)   | 0.026   |
| <b>Duration of stay in Beijing</b>                                                        |     |                      |                    |         |                      |         |
| < 1 year                                                                                  | 95  | 34.74(33)            | 1.00               |         | 1.00                 |         |
| ≥ 1 year                                                                                  | 416 | 66.27(208)           | 3.66(2.29 to 5.85) | <0.001  | 3.68 (2.04 to 6.64)  | <0.001  |
| <b>Number of female sex partners in the last 6 months</b>                                 |     |                      |                    |         |                      |         |
| 0                                                                                         | 382 | 64.66 (247)          | 1.00               |         | 1.00                 |         |
| ≥1                                                                                        | 129 | 47.29 (61)           | 0.49(0.33 to 0.74) | 0.001   | 0.48(0.29 to 0.80)   | 0.005   |
| <b>Have received voluntary counseling and testing (VCT) service in the past 12 months</b> |     |                      |                    |         |                      |         |
| No                                                                                        | 243 | 51.85 (126)          | 1.00               |         | 1.00                 |         |

Formatted: Font: Times New Roman

|     |     |             |                    |        |                    |       |
|-----|-----|-------------|--------------------|--------|--------------------|-------|
| Yes | 268 | 67.91 (182) | 1.97(1.37 to 2.81) | <0.001 | 1.71(1.07 to 2.72) | 0.024 |
|-----|-----|-------------|--------------------|--------|--------------------|-------|

For eight-month retention, age > 25 years old (AOR = 1.76, 95% CI 1.16 to 2.68, p = 0.008), living in Beijing for more than one year (AOR = 1.68, 95% CI 1.03 to 2.73, p = 0.039), first sexual partner was female (AOR = 0.60, 95% CI 0.41 to 0.88, p = 0.009), ever had group sex (AOR = 0.50, 95% CI 0.28 to 0.89, p = 0.019), and had received lubricant in the past 12 months (AOR = 2.31, 95% CI 1.56 to 3.42, p < 0.001 ) were retained in the final model using stepwise multiple logistic regression analysis (Table 5).

**Table 5** Factors associated with eight-month retention rate in a cohort study of migrant MSM in Beijing, China, using stepwise multiple logistic analysis.

| Factor                                               | N   | Retention rate % (n) | OR (95% CI)        | p Value | Adjusted OR (95% CI) | p Value |
|------------------------------------------------------|-----|----------------------|--------------------|---------|----------------------|---------|
| <b>Age</b>                                           |     |                      |                    |         |                      |         |
| 18-24                                                | 149 | 44.30(66)            | 1.00               |         | 1.00                 |         |
| ≥25                                                  | 362 | 57.18(207)           | 1.68(1.14 to 2.47) | 0.008   | 1.76(1.16 to 2.68)   | 0.008   |
| <b>Duration of stay in Beijing</b>                   |     |                      |                    |         |                      |         |
| < 1 year                                             | 78  | 48.72 (38)           | 1.00               |         | 1.00                 |         |
| > 1 year                                             | 338 | 58.88 (199)          | 2.17(1.37 to 3.43) | <0.001  | 1.68 (1.03 to 2.73)  | 0.039   |
| <b>Gender of the first sexual partner</b>            |     |                      |                    |         |                      |         |
| Male                                                 | 300 | 58.33 (175)          | 1.00               |         | 1.00                 |         |
| Female                                               | 211 | 46.45 (98)           | 0.62(0.43 to 0.88) | 0.008   | 0.60 (0.41 to 0.88)  | 0.009   |
| <b>Ever had group sex</b>                            |     |                      |                    |         |                      |         |
| NO                                                   | 452 | 54.87 (248)          | 1.00               |         | 1.00                 |         |
| YES                                                  | 59  | 42.37 (25)           | 0.61(0.35 to 1.05) | 0.072   | 0.50 (0.28 to 0.89)  | 0.019   |
| <b>Have received lubricant in the past 12 months</b> |     |                      |                    |         |                      |         |
| NO                                                   | 109 | 34.86 (38)           | 1.00               |         | 1.00                 |         |
| YES                                                  | 402 | 58.46 (235)          | 2.59(1.78 to 3.77) | <0.001  | 2.31 (1.56 to 3.42)  | <0.001  |

Formatted: Font: Times New Roman

**DISCUSSION**

Our study found that the prevalence of HIV (6.58%) among migrant MSM was at a high epidemic level, which was highlighted in comparison to that of a previous study among the migrant general population (0%) in Beijing.<sup>H9231</sup>

1  
2  
3  
4  
5  
6  
7 Additionally, it was higher than the 4.8% in 2007 among general MSM in Beijing.<sup>[2420]</sup> ~~Although it was lower than~~  
8  
9 ~~8.0% in 2009, the proportion of the migrant population was also as high as 88%.~~<sup>[7]</sup> A similar result (5.9%) was found in  
10  
11 a recent cross-sectional study among migrant MSM.<sup>[723]</sup> Incidence in this subgroup (7.83/100PY) was consistent with  
12  
13 that of migrant MSM (8.51/100PY) in a MSM cohort study in Beijing, and higher than the incidence of permanent  
14  
15 resident MSM.<sup>[2425]</sup> It was also higher than the incidence of general MSM in different parts of China.<sup>[22, 236, 7]</sup>

16  
17 The study found that participants whose first anal intercourse occurred before age 15 had significantly higher risk for  
18  
19 HIV seroconversion. An American study of young minority MSM found that study participants who had an MSM  
20  
21 sexual debut before 16 years old were more likely to have psychological problems and high risk behaviors like  
22  
23 exchanging sex and drug use.<sup>[2426]</sup> Early sexual debut ~~would could~~ have a deep and long-term influence on an  
24  
25 individual's developing sexual concept, but appropriate sex education has generally been shunned in traditional Chinese

26  
27 education. Our study indicated that ~~early sex education should be combined with Chinese characteristics, and relevant~~  
28  
29 ~~measures need to be implemented as soon as possible.~~ Another risk factor significantly associated with HIV incidence  
30  
31 was ever had group sex. An explanation of this observation is that psychological stress caused by stigma and

32  
33 discrimination hinders the development of longer-term relationships between MSM,<sup>[2527]</sup> and having sex with multiple  
34  
35 ~~sex~~-partners increases the chance of HIV transmission. This indicates a need for confidentiality and support services for  
36  
37 migrant MSM. Serious attention should also be paid to the prevalence of STDs. The prevalence rate of syphilis (29.62%)  
38  
39 was higher than those of previous studies conducted among MSM in Beijing, such as 19.8% in 2007,<sup>[2024]</sup> and 22.0% in

40  
41 2009.<sup>[710]</sup> ~~It was also higher than those of MSM from many other provinces.~~<sup>[23, 26]</sup> The incidence of syphilis  
42  
43 (11.11/100PY) was also at an extremely high level compare to 8.06/100PY in a cohort study among MSM during the  
44  
45 same period in 2009.<sup>[2425]</sup> High prevalence of syphilis among MSM was a common risk factor for encouraging HIV  
46  
47 infection because of the biological and behavioral links between syphilis and HIV.<sup>[2728]</sup>

48  
49  
50 The multiple ~~regression analyses-analysis~~ significantly revealed that self-identified bisexuals were five times more  
51  
52

Formatted: Line spacing: Double

Formatted: English (U.S.)

Formatted: English (U.S.)

Formatted: English (U.S.)

likely than homosexuals to be infected with syphilis. One major reason for this outcome could be that bisexuals may have more varied sexual behaviors with a wider range of sexual partners, including males and females. In addition, a cross-sectional study among young migrant MSM in Beijing discovered that MSM who were engaged in bisexual behavior had a higher rate of unprotected sex with stable female partners and were less likely to take part in prevention behaviors,<sup>[48]</sup> which was consistent with our finding that those who had at least one female sex partner and those whose first sexual partner was female were significantly more likely to be lost at four-month and eight-month follow-up visits, respectively. MSM face strong social pressure and stigma in China, which may lead them to hide their sexual orientation by unwillingly engaging in heterosexual relationships; thus, most of many Chinese MSM will potentially enter a heterosexual marriage due to social and familial pressure.<sup>[4, e]</sup> Being afraid of Concerned about disclosing their homosexuality MSM behavior to their female partners, bisexual MSM will may be more reluctant to be followed up. Also, bisexual MSM are more likely to take engage in risk behaviors, such as having unprotected sex for to indicate loyalty to their female partners and having commercial or casual sex with men to conceal their orientation. Moreover, only 18.4% of the participants reported having received an examination or treatment for sexually transmitted diseases in the past 12 months, which may be caused by related to the high cost of health services and low coverage of health insurance for the migrant population.<sup>[48]</sup> Low risk-awareness might be another reason for their lower access to HIV/STD test and treatment. All of these emphasize an urgent need for widespread and accurate syphilis screening and affordable treatment for migrant MSM in Beijing.

In our study, the retention rate was lower than in previous cohort studies implemented among general MSM in Beijing (86.2% in 2007, 86.8% in 2009).<sup>[25, 26]</sup> From the multiple regression analyses analysis, participants who were less than 25 years old were more likely to be lost at both four-month and eight-month follow-up visits. Similar problems have occurred among studies of young MSM in the US.<sup>[29]</sup> A plausible reason for this observation was that many young people in China have poor knowledge of safe sexual behaviors. Traditional interventions are more pragmatic but less

Formatted: Superscript

Formatted: Superscript

Formatted: Superscript

1  
2  
3  
4  
5  
6  
7 attractive and appropriate for young people. A qualitative investigation implemented among young MSM in Milwaukee  
8  
9 and Detroit offered some new approaches, such as ~~that embedding~~ HIV prevention efforts ~~should be embedded~~ in the  
10  
11 context of broader life and relationship issues facing young MSM.<sup>[2930]</sup> As differences almost certainly exist between  
12  
13 young Chinese and American MSM, predictors of retention among young MSM in Beijing deserve further  
14  
15 ~~discussion~~ investigation.

16  
17  
18 As for positive predictors, we found those who had been in Beijing for more than one year or who had received  
19  
20 lubricant were more likely to be maintained in this cohort ~~both in both~~ four-month and eight-month follow-up visits.

21  
22 As these services are provided by local communities, we found similar results as those in Yangzhou.<sup>[208]</sup> Migrant MSM  
23  
24 who stay longer in Beijing may have more chances to receive effective and stable intervention services, and ~~the their~~  
25  
26 potential impact on ~~their~~ increasing awareness of self-protection ~~would might~~ encourage them to pay closer attention to  
27  
28 advances in research. As a result, migrants may be more likely to remain with the investigation to show their support.

29  
30 However, the data showed that receiving voluntary counseling and testing (VCT) service in the past 12 months was a  
31  
32 positive factor at four-month follow-up visit, which was replaced by receiving lubricant at eight-month visit. This  
33  
34 indicate that factors associated with retention rate may change as time goes on. In other words, different factors may  
35  
36 have a unique impact on retention rate in different time periods, which implies that we should adjust methods for  
37  
38 interventions factors over in time so as to keep the entire cohort more stable. From the results of our study, the coverage  
39  
40 of intervention on this population was limited. Aimed at the mobility problem inherent to migrant populations, a  
41  
42 specific strategy of intervention ~~aimed-targeted~~ at migrant MSM is imminently needed.

43  
44  
45 This study has a number of limitations. Firstly, retention rates were relatively low, which means that the estimates of  
46  
47 HIV/syphilis seroconversions may be biased because no evidence showed a balance between participants retained in  
48  
49 the study and those lost to follow-up. Secondly, using non-random sampling methods may have led to selection bias.  
50  
51  
52 Thirdly, the sample size was insufficient, and some potential~~ly~~ relevant factors may be concealed by the small sample  
53

1  
2  
3  
4  
5  
6  
7 size. Lastly, the study subjects were all inflow population and did not include outflow population, and the proportion of  
8 migrants from different provinces varied. There is no evidence to show the data could be generalized to other regions.

9  
10  
11 ~~In conclusion~~To our knowledge, this is the first cohort study to assess incidence of HIV and syphilis among migrant  
12 MSM in Beijing. With highly prevalent risk behaviors, the migrant MSM had a high level of HIV incidence, and the  
13 epidemic of syphilis among this subgroup was extremely serious. Bisexual MSM were at a high risk of syphilis  
14 seroconversion, and were more concealed among migrant MSM. Future prevention efforts should include screening and  
15 appropriate treatment for syphilis. Multiple modes of intervention services need to be improved and implement for this  
16 marginalised group. ~~To encourage bisexual MSM to test and be followed-up, For the sake of bisexual MSM's health, as~~  
17 ~~well as for their partners', more attention need to be paid on their female partners of bisexual MSM to encourage them~~  
18 ~~to take test and be followed-up for both of the two groups' health.~~ A greater understanding of risk behaviors and the  
19 HIV/STD epidemic among migrant MSM needs to be investigated in the future.  
20  
21  
22  
23  
24  
25  
26  
27  
28  
29  
30  
31

### 32 **ACKNOWLEDGEMENTS**

33  
34 This work was supported in part by Natural Science Foundation of China (81001288, 11171268), National S&T Major  
35 Project Foundation of China (No. 2012ZX10001-001 and No. 2011ZX10004-902), Priority Academic Program  
36 Development of Jiangsu Higher Education Institutions (PAPD).  
37  
38 The funders had no role in study design, data collection and analysis, decision to publish, or preparation of the  
39 manuscript.  
40  
41  
42  
43  
44  
45  
46

### 47 **CONTRIBUTORS**

ZP, RY and NW conceived and designed the experiments, HL and LW performed the experiments, HM and WM analyzed the data, HZ and YZ contributed reagents/materials/analysis tools, HM, WM and ZP wrote the paper, and all authors read and approved the final version of the manuscript.

#### COMPETING INTERESTS

The authors have no conflict of interest to declare.

Formatted: Font: 10.5 pt

#### Data sharing statement

Extra data is available by emailing [zhihangpeng@njmu.edu.cn](mailto:zhihangpeng@njmu.edu.cn).

Formatted: Font: 10.5 pt

#### REFERENCES

1. Jia Z, Wang L, Chen R Y, *et al*. Tracking the evolution of HIV/AIDS in China from 1989–2009 to inform future prevention and control efforts. *PLoS One* 2011; 6: e25671.

2. National Center for STD/AIDS Prevention and Control, Chinese Center for Disease Prevention and Control. *Epidemic of HIV/AIDS and sexual transmitted diseases and main progression on prevention in 2011, China*. Beijing: Chinese Center for Disease Control and Prevention, 2012.

Formatted: Font: (Default) Times New Roman, 10.5 pt, Font color: Auto

Formatted: Font: (Default) Times New Roman, 10.5 pt, Italic, Font color: Auto

3. Ministry of Health of the People's Republic of China, UNAIDS, WHO. *National report for HIV/AIDS estimation in China, 2011*. Beijing: Chinese Center for Disease Control and Prevention, 2011.

Formatted: Font: Italic

Formatted: Font: (Default) Times New Roman, 10.5 pt, Italic, Font color: Auto, Pattern: Clear

4. Chow EPF, Lau JTF, Zhuang X, *et al*. HIV Prevalence Trends, Risky Behaviours, and Governmental and Community Responses to the Epidemic among Men Who Have Sex with Men in China. *BioMed research international* 2014;2014:607261.

Formatted: Font: (Default) Times New Roman, 10.5 pt, Font color: Auto, Pattern: Clear

Formatted: Font: (Default) Times New Roman, 10.5 pt, Bold, Font color: Auto, Pattern: Clear

Formatted: Font: (Default) Times New Roman, 10.5 pt, Font color: Auto, Pattern: Clear



3. Feng L, Ding X, Lu R, *et al.* High HIV prevalence detected in 2006 and 2007 among men who have sex with men in China's largest municipality: An alarming epidemic in Chongqing, China. *J Acquir Immune Defic Syndr* 2009;**52**:79-85.

4. Ma X, Zhang Q, He X, *et al.* Trends in prevalence of HIV, syphilis, hepatitis C, hepatitis B, and sexual risk behavior among men who have sex with men: results of 3 consecutive respondent driven sampling surveys in Beijing, 2004 through 2006. *J Acquir Immune Defic Syndr* 2007;**45**:581-7.

5. Zhang M, Chu Z, Wang H, *et al.* A rapidly increasing incidence of HIV and syphilis among men who have sex with men in a major city of China. *AIDS Res Hum Retroviruses* 2011;**27**:1139-40.

5. Lu F, Fu JH, Zhang RF, *et al.* Analysis of HIV epidemic situation and immigrant population. *Infect Dis Info* 2006;**19**:259-61.

6. Xu J, An M, Han X, *et al.* Prospective cohort study of HIV incidence and molecular characteristics of HIV among men who have sex with men(MSM) in Yunnan Province, China. *BMC Infect Dis* 2013;**13**:3.

7. Xu J, Zhang M, Brown K, *et al.* Syphilis and HIV seroconversion among a 12-month prospective cohort of men who have sex with men in Shenyang, China. *Sex Transm Dis* 2010;**37**:432-9.

— Peng Z, Yang H, Norris J, *et al.* HIV Incidence and Predictors Associated with Retention in a Cohort of Men Who have Sex with Men in Yangzhou, Jiangsu Province, China. *PloS One* 2012;**7**:e52731.

8.

6-9. Yang H, Tang W, Xiao Z, *et al.* Worsening Epidemic of HIV and Syphilis Among Men Who Have Sex With Men in Jiangsu Province, China. *Clin Infect Dis* 2014;**58**:1753-9.

10. Fan S, Lu H, Ma X, *et al.* Behavioral and serologic survey of men who have sex with men in Beijing, China: implication for HIV intervention. *AIDS Patient Care STDS* 2012;**26**:148-55.

7-11. Feng L, Ding X, Lu R, *et al.* High HIV prevalence detected in 2006 and 2007 among men who have sex with men

Formatted: Font: Arial, (Intl) SimSun

Formatted: Font: Times New Roman

Formatted: Font: Times New Roman, Italic

Formatted: Font: Times New Roman

Formatted: Default Paragraph Font, Font: (Default) Times New Roman, 10.5 pt, Italic, Font color: Auto

Formatted: Font: (Default) Times New Roman, 10.5 pt

Formatted: Font: (Default) Times New Roman, 10.5 pt, Bold

Formatted: Font: (Default) Times New Roman, 10.5 pt

Formatted: Font color: Custom Color(34,34,34)

Formatted: Numbered + Level: 1 + Numbering Style: 1, 2, 3, ... + Start at: 1 + Alignment: Left + Aligned at: 0" + Tab after: 0.3" + Indent at: 0.3", Tab stops: 0.3", Left

Formatted: Font: Italic

Formatted: Font: Bold

Formatted: Font: Times New Roman

- 1  
2  
3  
4  
5  
6  
7 [in China's largest municipality: An alarming epidemic in Chongqing, China. \*J Acquir Immune Defic Syndr\*](#)  
8  
9 [2009;52:79-85.](#)  
10  
11 ~~8-12.~~ Berg CJ, Nebl EJ, Wong FY, *et al.* Prevalence and correlates of tobacco use among a sample of MSM in Shanghai,  
12  
13 China. *Nicotine Tob Res* 2011;13:22-8.  
14  
15 ~~9-13.~~ Liu H, Yang H, Li X, *et al.* Men who have sex with men and human immunodeficiency virus/sexually transmitted  
16  
17 disease control in China. *Cell Res* 2005;15:858.  
18  
19 ~~10-14.~~ Lau JT, Wang M, Wong HN, *et al.* Prevalence of bisexual behaviors among men who have sex with men  
20  
21 (MSM) in China and associations between condom use in MSM and heterosexual behaviors. *Sex Transm Dis*  
22  
23 2008;35:406-13.  
24  
25 ~~11-15.~~ He N, Wong FY, Huang ZJ, *et al.* HIV risks among two types of male migrants in Shanghai, China: money  
26  
27 boys vs. general male migrants. *AIDS* 2007;21:S73-9.  
28  
29 ~~12-16.~~ Yang X, Derlega VJ, Luo H. Migration, behaviour change and HIV/STD risks in China. *AIDS Care*  
30  
31 2007;19:282-8.  
32  
33 ~~13-17.~~ Yang X. Temporary migration and HIV risk behaviors in China. *Environment and Planning A*  
34  
35 2006;38:1527.  
36  
37 ~~14-18.~~ Peng Y, Chang W, Zhou H, *et al.* Factors associated with health-seeking behavior among migrant workers  
38  
39 in Beijing, China. *BMC Health Serv Res* 2010;10:69.  
40  
41 ~~15-19.~~ Shi TX, Zhang BC, Li XF, *et al.* Study on the high risk behaviors related to AIDS among men who having  
42  
43 sex with men in the floating population. *Chin J Epidemiol* 2009;30:668.  
44  
45 ~~16-20.~~ [China Daily \(2009, July 10\). Newly reported HIV/AIDS cases increase 24.3% per year surge](#) in Beijing.  
46  
47 Retrieved from [http://](http://health.sina.com.cn/news/2013-11-29/0921114941.shtml)  
48  
49 [health.sina.com.cn/news/2013-11-29/0921114941.shtml](http://health.sina.com.cn/news/2013-11-29/0921114941.shtml) [www.chinadaily.com.cn/china/2009-07/10/content\\_84056](http://www.chinadaily.com.cn/china/2009-07/10/content_84056)  
50  
51  
52  
53  
54  
55  
56  
57  
58  
59  
60

70.htm (accessed 30-31 Aug-May 2013/2014).

17-21. Wang B, Li X, Stanton B, *et al.* Socio-demographic and behavioral correlates for HIV and syphilis infections among migrant men who have sex with men in Beijing, China. *AIDS Care* 2013;**25**:249-57.

18-22. Guo Y, Li X, Song Y, *et al.* Bisexual behavior among Chinese young migrant men who have sex with men: implications for HIV prevention and intervention. *AIDS Care* 2012;**24**:451-8.

19-23. Xia DY, Lu HY, Liu GW, *et al.* Prevalence of HIV infection, syphilis, HCV and risk behaviors among migrant population in Beijing. *Chin J AIDS STD* 2011;**17**:430-3.

20-24. Ruan Y, Luo F, Jia Y, *et al.* Risk factors for syphilis and prevalence of HIV, hepatitis B and C among men who have sex with men in Beijing, China: implications for HIV prevention. *AIDS Behav* 2009;**13**:663-70.

21-25. Li D, Li S, Liu Y, *et al.* HIV incidence among men who have sex with men in Beijing: a prospective cohort study. *BMJ Open* 2012;**2**:e001829.

22. Xu JJ, Zhang M, Brown K, *et al.* Syphilis and HIV seroconversion among a 12-month prospective cohort of men who have sex with men in Shenyang, China. *Sex Transm Dis* 2010;**37**:432-9.

23. Xu J, An M, Han X, *et al.* Prospective cohort study of HIV incidence and molecular characteristics of HIV among men who have sex with men (MSM) in Yunnan Province, China. *BMC Infect Dis* 2013;**13**:3.

24-26. Outlaw AY, Phillips G, Hightow-Weidman LB, *et al.* Age of MSM sexual debut and risk factors: results from a multisite study of racial/ethnic minority YMSM living with HIV. *AIDS Patient Care STDS* 2011;**25**:S23-9.

25-27. Neilands TB, Steward WT, Choi KH. Assessment of stigma towards homosexuality in China: a study of men who have sex with men. *Arch Sex Behav* 2008;**37**:838-44.

26-28. Guo H, Wei JF, Yang H, *et al.* Rapidly increasing prevalence of HIV and syphilis and HIV-1 subtype characterization among men who have sex with men in Jiangsu, China. *Sex Transm Dis* 2009; **36**:120-125.

27-29. Galvin SR, Cohen MS. The role of sexually transmitted diseases in HIV transmission. *Nat Rev Microbiol*

2004;2:33-42.

28-30. Hightow-Weidman LB, Jones K, Wohl AR, *et al.* Early linkage and retention in care: findings from the outreach, linkage, and retention in care initiative among young men of color who have sex with men. *AIDS Patient Care STDS* 2011;25:S31-8.

29. Seal DW, Kelly JA, Bloom FR, *et al.* HIV prevention with young men who have sex with men: what young men themselves say is needed. *AIDS Care* 2000;12:5-26.

30. Peng Z, Yang H, Norris J, *et al.* HIV Incidence and Predictors Associated with Retention in a Cohort of Men Who have Sex with Men in Yangzhou, Jiangsu Province, China. *PloS One* 2012;7:e52731.

Figure legend:

Figure 1. Study flowchart of the migrant MSM cohort, with focus on the HIV and syphilis incidence

Formatted: Font: 10.5 pt

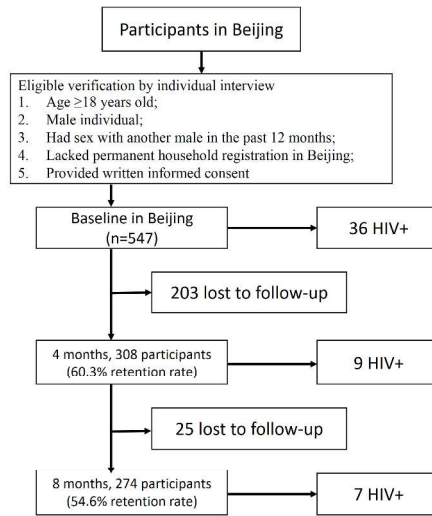

Figure 1. Study flowchart of the migrant MSM cohort, with focus on the HIV and syphilis incidence (N=547).

338x190mm (300 x 300 DPI)

review only

STROBE Statement—Checklist of items that should be included in reports of *cohort studies*

|                              | Item No | Recommendation                                                                                                                                                                                               | Reported on page # |
|------------------------------|---------|--------------------------------------------------------------------------------------------------------------------------------------------------------------------------------------------------------------|--------------------|
| <b>Title and abstract</b>    | 1       | (a) Indicate the study's design with a commonly used term in the title or the abstract                                                                                                                       | 1                  |
|                              |         | (b) Provide in the abstract an informative and balanced summary of what was done and what was found                                                                                                          | 1                  |
| <b>Introduction</b>          |         |                                                                                                                                                                                                              |                    |
| Background/rationale         | 2       | Explain the scientific background and rationale for the investigation being reported                                                                                                                         | 1-2                |
| Objectives                   | 3       | State specific objectives, including any prespecified hypotheses                                                                                                                                             | 3                  |
| <b>Methods</b>               |         |                                                                                                                                                                                                              |                    |
| Study design                 | 4       | Present key elements of study design early in the paper                                                                                                                                                      | 3                  |
| Setting                      | 5       | Describe the setting, locations, and relevant dates, including periods of recruitment, exposure, follow-up, and data collection                                                                              | 3                  |
| Participants                 | 6       | (a) Give the eligibility criteria, and the sources and methods of selection of participants. Describe methods of follow-up                                                                                   | 4                  |
|                              |         | (b) For matched studies, give matching criteria and number of exposed and unexposed                                                                                                                          | 4                  |
| Variables                    | 7       | Clearly define all outcomes, exposures, predictors, potential confounders, and effect modifiers. Give diagnostic criteria, if applicable                                                                     | 4                  |
| Data sources/<br>measurement | 8*      | For each variable of interest, give sources of data and details of methods of assessment (measurement). Describe comparability of assessment methods if there is more than one group                         | 4                  |
| Bias                         | 9       | Describe any efforts to address potential sources of bias                                                                                                                                                    | 5                  |
| Study size                   | 10      | Explain how the study size was arrived at                                                                                                                                                                    | 3                  |
| Quantitative variables       | 11      | Explain how quantitative variables were handled in the analyses. If applicable, describe which groupings were chosen and why                                                                                 | 5                  |
| Statistical methods          | 12      | (a) Describe all statistical methods, including those used to control for confounding                                                                                                                        | 5                  |
|                              |         | (b) Describe any methods used to examine subgroups and interactions                                                                                                                                          |                    |
|                              |         | (c) Explain how missing data were addressed                                                                                                                                                                  |                    |
|                              |         | (d) If applicable, explain how loss to follow-up was addressed                                                                                                                                               |                    |
|                              |         | (e) Describe any sensitivity analyses                                                                                                                                                                        | 5                  |
| <b>Results</b>               |         |                                                                                                                                                                                                              |                    |
| Participants                 | 13*     | (a) Report numbers of individuals at each stage of study—eg numbers potentially eligible, examined for eligibility, confirmed eligible, included in the study, completing follow-up, and analysed            | 6                  |
|                              |         | (b) Give reasons for non-participation at each stage                                                                                                                                                         |                    |
|                              |         | (c) Consider use of a flow diagram                                                                                                                                                                           |                    |
| Descriptive data             | 14*     | (a) Give characteristics of study participants (eg demographic, clinical, social) and information on exposures and potential confounders                                                                     | 6                  |
|                              |         | (b) Indicate number of participants with missing data for each variable of interest                                                                                                                          |                    |
|                              |         | (c) Summarise follow-up time (eg, average and total amount)                                                                                                                                                  | 10                 |
| Outcome data                 | 15*     | Report numbers of outcome events or summary measures over time                                                                                                                                               | 8                  |
| Main results                 | 16      | (a) Give unadjusted estimates and, if applicable, confounder-adjusted estimates and their precision (eg, 95% confidence interval). Make clear which confounders were adjusted for and why they were included | 8-9                |

|                          |    |                                                                                                                                                                            |       |
|--------------------------|----|----------------------------------------------------------------------------------------------------------------------------------------------------------------------------|-------|
|                          |    | (b) Report category boundaries when continuous variables were categorized                                                                                                  |       |
|                          |    | (c) If relevant, consider translating estimates of relative risk into absolute risk for a meaningful time period                                                           |       |
| Other analyses           | 17 | Report other analyses done—eg analyses of subgroups and interactions, and sensitivity analyses                                                                             | 9-10  |
| <b>Discussion</b>        |    |                                                                                                                                                                            |       |
| Key results              | 18 | Summarise key results with reference to study objectives                                                                                                                   | 12-13 |
| Limitations              | 19 | Discuss limitations of the study, taking into account sources of potential bias or imprecision. Discuss both direction and magnitude of any potential bias                 | 14    |
| Interpretation           | 20 | Give a cautious overall interpretation of results considering objectives, limitations, multiplicity of analyses, results from similar studies, and other relevant evidence | 12-13 |
| Generalisability         | 21 | Discuss the generalisability (external validity) of the study results                                                                                                      | 14    |
| <b>Other information</b> |    |                                                                                                                                                                            |       |
| Funding                  | 22 | Give the source of funding and the role of the funders for the present study and, if applicable, for the original study on which the present article is based              | 15    |

\*Give information separately for exposed and unexposed groups.

**Note:** An Explanation and Elaboration article discusses each checklist item and gives methodological background and published examples of transparent reporting. The STROBE checklist is best used in conjunction with this article (freely available on the Web sites of PLoS Medicine at <http://www.plosmedicine.org/>, Annals of Internal Medicine at <http://www.annals.org/>, and Epidemiology at <http://www.epidem.com/>). Information on the STROBE Initiative is available at <http://www.strobe-statement.org>.

# BMJ Open

## High Incidence of HIV and syphilis among Migrant Men Who have Sex with Men in Beijing, China: A Prospective Cohort Study

|                                 |                                                                                                                                                                                                                                                                                                                                                                                                                                                                                                                                                                                                                                                                                                                                                                                                                                                                                                                                                                                                                                                            |
|---------------------------------|------------------------------------------------------------------------------------------------------------------------------------------------------------------------------------------------------------------------------------------------------------------------------------------------------------------------------------------------------------------------------------------------------------------------------------------------------------------------------------------------------------------------------------------------------------------------------------------------------------------------------------------------------------------------------------------------------------------------------------------------------------------------------------------------------------------------------------------------------------------------------------------------------------------------------------------------------------------------------------------------------------------------------------------------------------|
| Journal:                        | <i>BMJ Open</i>                                                                                                                                                                                                                                                                                                                                                                                                                                                                                                                                                                                                                                                                                                                                                                                                                                                                                                                                                                                                                                            |
| Manuscript ID:                  | bmjopen-2014-005351.R2                                                                                                                                                                                                                                                                                                                                                                                                                                                                                                                                                                                                                                                                                                                                                                                                                                                                                                                                                                                                                                     |
| Article Type:                   | Research                                                                                                                                                                                                                                                                                                                                                                                                                                                                                                                                                                                                                                                                                                                                                                                                                                                                                                                                                                                                                                                   |
| Date Submitted by the Author:   | 06-Aug-2014                                                                                                                                                                                                                                                                                                                                                                                                                                                                                                                                                                                                                                                                                                                                                                                                                                                                                                                                                                                                                                                |
| Complete List of Authors:       | Mao, Hengyi; Nanjing Medical University, Department of Epidemiology & Biostatistics, School of Public Health<br>Ma, Wenzhe; Nanjing Medical University, Department of Epidemiology & Biostatistics, School of Public Health<br>Lu, Hongyan; Beijing Center for Disease Prevention and Control, Department of STDs/AIDS Prevention and Control<br>Wang, Lu; Chinese Center for Disease Control and Prevention, National Center for AIDS/STD Control and Prevention<br>Zheng, Hui; Nanjing Medical University, Department of Epidemiology & Biostatistics, School of Public Health<br>Zhu, Yingying; Nanjing Medical University, Department of Epidemiology & Biostatistics, School of Public Health<br>Peng, Zhihang; Nanjing Medical University, Department of Epidemiology & Biostatistics, School of Public Health<br>Yu, Rongbin; Nanjing Medical University, Department of Epidemiology & Biostatistics, School of Public Health<br>Wang, Ning; Chinese Center for Disease Control and Prevention, National Center for AIDS/STD Control and Prevention |
| <b>Primary Subject Heading</b>: | HIV/AIDS                                                                                                                                                                                                                                                                                                                                                                                                                                                                                                                                                                                                                                                                                                                                                                                                                                                                                                                                                                                                                                                   |
| Secondary Subject Heading:      | Epidemiology, Sexual health, Infectious diseases                                                                                                                                                                                                                                                                                                                                                                                                                                                                                                                                                                                                                                                                                                                                                                                                                                                                                                                                                                                                           |
| Keywords:                       | HIV & AIDS < INFECTIOUS DISEASES, Epidemiology < INFECTIOUS DISEASES, SEXUAL MEDICINE                                                                                                                                                                                                                                                                                                                                                                                                                                                                                                                                                                                                                                                                                                                                                                                                                                                                                                                                                                      |
|                                 |                                                                                                                                                                                                                                                                                                                                                                                                                                                                                                                                                                                                                                                                                                                                                                                                                                                                                                                                                                                                                                                            |

SCHOLARONE™  
Manuscripts



1  
2  
3  
4  
5 High Incidence of HIV and syphilis among Migrant Men Who have Sex with  
6  
7  
8 Men in Beijing, China: A Prospective Cohort Study  
9

10 Hengyi Mao<sup>1#</sup>, Wenzhe Ma<sup>1#</sup>, Hongyan Lu<sup>2</sup>, Lu Wang<sup>3</sup>, Hui Zheng<sup>1</sup>, Yingying Zhu<sup>1</sup>, Zhihang Peng<sup>1\*</sup>,

11  
12 Rongbin Yu<sup>1</sup>, Ning Wang<sup>3\*</sup>  
13  
14  
15  
16  
17  
18  
19  
20

- 21 1. Department of Epidemiology & Biostatistics, School of Public Health, Nanjing Medical University,  
22  
23 Nanjing, China;  
24  
25  
26 2. Department of STDs/AIDS Prevention and Control, Beijing Center for Disease Prevention and Control, Beijing,  
27  
28 China;  
29  
30  
31 3. National Center for AIDS/STD Control and Prevention, Chinese Center for Disease Control and Prevention,  
32  
33 Beijing, China.  
34  
35

36 #These authors contributed equally to this work  
37

38 \*Corresponding author  
39

40  
41 Postal address: 818th east Tianyuan Road, Nanjing, China;  
42

43  
44 E-mail: zhihangpeng@njmu.edu.cn; wangning\_12@126.com  
45

46  
47 Tel: 86-25-86868436;  
48

49  
50 Fax: 86-25-86868499.  
51  
52  
53

54 **Keywords:** HIV; syphilis; male homosexuality; cohort study; China  
55  
56  
57

58  
59 **Word Count:** 3613  
60

**ABSTRACT**

**Objectives:** The purpose of the study was to investigate the incidence of HIV and syphilis and their related factors, as well as to examine the predictors associated with seroconversion among migrant men who have sex with men in Beijing, China.

**Design:** Prospective cohort study.

**Setting:** Beijing, China.

**Participants:** 511 HIV-negative migrant MSM.

**Primary and secondary outcome measures:** Sociodemographic and behavioral information of participants, HIV and syphilis incidence rates, and factors associated with HIV/syphilis seroconversion and cohort retention.

**Results:** Of the 511 participants, 60.3% (308) and 52.4% (273) were retained at the four-month and eight-month follow-up visits, respectively. The HIV and syphilis incidence rates were 7.83 (95% CI 4.48 to 12.72) and 11.11 (95% CI 6.47 to 17.80) cases per 100 person-years, respectively. HIV seroconversion was significantly associated with had first anal intercourse at age 15 or younger (adjusted hazard ratio (aHR) = 9.20, 95% CI 1.94 to 43.56) and ever had group sex (aHR = 4.30, 95% CI 1.40 to 13.18). Bisexual orientation (aHR = 5.09, 95% CI 1.02 to 25.57) was significantly associated with syphilis seroconversion. Predictors associated with both four-month and eight-month retention rates included age  $\geq$  25 years old and living in Beijing for more than one year.

**Conclusions:** The high incidence of HIV and syphilis among migrant MSM are a cause for concern. A comprehensive strategy should be implemented to maintain a higher retention rate among migrant MSM.

**Strengths and limitations of this study**

- First cohort study to assess incidence of HIV and syphilis among migrant MSM in Beijing.
- Cox regression analysis and stepwise multiple logistic regression were used to identify factors associated with HIV/syphilis seroconversion and cohort retention, respectively.
- Retention rates were relatively low, which means that the estimates of HIV/syphilis seroconversions may be biased because no evidence showed a balance between those retained in the study and those lost to follow-up.
- Sampling methods may have led to selection bias.
- No outflow population was included, and the proportions of migrants from different provinces varied, which may lead to difficulties with generalization of the data.

## INTRODUCTION

In China over the last decade, sexual transmission has become the dominant route of HIV transmission.<sup>1</sup> Cases attributed to homosexual transmission rose from 7.3% in 2005 to 16.1% in 2011, forming an increasing proportion of infections among people living with HIV/AIDS (PLWHA).<sup>2</sup> In the 2011 HIV epidemic assessment report, homosexual transmissions accounted for 17.4% of infections among the estimated 780,000 people living with HIV/AIDS, an increase from 14.7% in 2009.<sup>3</sup> A growing number of studies have revealed an upward trend of HIV incidence among MSM in different parts of China. For example, incidence increased from 8.0 to 15.4 per 100 person-years during 2006–2009 in Chongqing, from 5. to 6.3 per 100 person-years during 2010–2012 in Zhejiang.<sup>4</sup> 1 to 10.2 per 100 person-years during 2007–2009 in Liaoning, from 5.7 to 8.2 per 100 person-years during 2008–2011 in Jiangsu and from 3.5

In recent years, there has been growing awareness that internal migration within China may be shifting the HIV epidemic by broadening social integration and connecting populations from different regions through sexual networks.<sup>1</sup> Data from national behavioral surveillance from 2004–2005 showed that in nine mainland provinces, migrant HIV/AIDS cases accounted for more than 50% of total infections.<sup>5</sup> A number of cohort studies on MSM have been implemented in China that reveal an HIV epidemic among MSM, but in most of these studies MSM retention was not very high. Retention rates for these cohort studies are rarely maintained over 70% at 12-months follow-up, and a few of them were even below 20%.<sup>6–9</sup> Reasons for these low rates may include migration of MSM.<sup>8</sup> Moreover, studies implemented among urban MSM also revealed a high proportion of migrants among MSM in major cities, such as in Beijing (88%),<sup>10</sup> Chongqing (80.3%)<sup>11</sup> and Shanghai (79.7%).<sup>12</sup> Although migration itself does not spread HIV or other sexually transmitted diseases (STDs), it may increase the possibility of infection when combined with high risk behaviors, which are prevalent among MSM. It has been confirmed in numerous studies that high risk behaviors such

1  
2  
3 as unprotected anal sex, commercial sex, group sex, casual sex and having multiple sexual partners are prevalent among  
4  
5 MSM in China.<sup>13-15</sup> On the other hand, perceived stigma and discrimination due to traditional Chinese culture and  
6  
7 conservative social values have increasingly led Chinese MSM to marry female sexual partners, which leads to a  
8  
9 potential risk of transmitting HIV to the general population via heterosexual transmission.<sup>14</sup> As for migrants, lacking the  
10  
11 stability of a family or a home community and hampered by generally low educational levels, limited knowledge of  
12  
13 HIV/AIDS prevention, and discrimination and marginalization from the mainstream metropolitan society, high risk  
14  
15 behaviors may occur more frequently.<sup>16, 17</sup> Furthermore, due to China's household registration system and urban social  
16  
17 security system, migrants have limited access to comprehensive, convenient and long-term health services.<sup>18</sup> Recently,  
18  
19 some cross-sectional studies in China demonstrated that compared to local MSM, migrant MSM engage in more high  
20  
21 risk sexual behaviors such as multiple sexual partners, higher frequencies of anal and oral intercourse, and unprotected  
22  
23 sexual behaviors with both males and females.<sup>15, 19</sup> As a marginal and vulnerable subpopulation, migrant MSM should  
24  
25 be accorded a high level of consideration by researchers.  
26  
27

28  
29  
30 Beijing, the capital of China and a center of political, economic and cultural activity, is a magnet for the migrant  
31  
32 population. In 2012, Beijing's metropolitan population included some 7.7 million migrants, with migrants accounting  
33  
34 for 37.4% of the total population of Beijing (China National Bureau of Statistics, 2013). According to statistics from the  
35  
36 Beijing Municipal Bureau of Health, the proportion of MSM among HIV/AIDS cases increased from 22.8% in 2006 to  
37  
38 69.1% at the end of October 2013.<sup>20</sup> In addition, prior research among MSM in Beijing revealed that with the  
39  
40 increasing epidemic of HIV among MSM in recent years, the number of migrants among recruited participants also  
41  
42 showed a noticeable upward trend.<sup>10, 11</sup> This phenomenon implies the following: (1) migrant MSM play a main role in  
43  
44 MSM society in Beijing; (2) this marginal population emerged gradually with the constant improvement of sampling  
45  
46 methods; and (3) more targeted studies of this subpopulation are urgently needed, since at present only a few  
47  
48 cross-sectional studies have been conducted to investigate their HIV/STD infections and relative risk factors.<sup>21, 22</sup> Thus,  
49  
50  
51  
52  
53  
54  
55  
56  
57  
58  
59  
60

1  
2  
3 the purpose of this research was to assess the incidence of HIV and syphilis and examine the predictors associated with  
4  
5 seroconversion and retention in a prospective cohort study among migrant MSM in Beijing, China.  
6  
7  
8  
9

## 10 METHODS

### 11 Study design and study population

12  
13 This prospective cohort study was conducted in Beijing. Participants were all Chinese citizens and were recruited  
14  
15 through three methods. First, study participants were recruited directly through website advertisements by a  
16  
17 nongovernmental AIDS volunteer group (<http://www.hivolunt.net>). Second, peer recruiters were hired and trained to  
18  
19 distribute flyers with study-related information at MSM-frequented venues (e.g., MSM clubs, bars, parks and  
20  
21 bathhouses). Thirdly, study participants were encouraged to refer their peers to enroll in the study. Once a potential  
22  
23 participant had been referred or identified, local research team members approached the individual to verify eligibility,  
24  
25 which included age  $\geq 18$  years old, male gender, HIV-negative, had sex with another male in the past 12 months, lacked  
26  
27 permanent household registration in Beijing and provided written informed consent.  
28  
29  
30  
31  
32  
33

34  
35 We calculated the sample size using the equation  $n = \frac{(z_{\alpha} \sqrt{2pq} + z_{\beta} \sqrt{p_0q_0 + p_1q_1})^2}{(p_1 - p_0)^2}$ , where  $\alpha$  and  $\beta$  are 0.05 and  
36  
37 0.10 and the corresponding  $z_{\alpha}$  and  $z_{\beta}$  are 1.96 and 1.282.  $p_0$  represents the prevalence of HIV among general  
38  
39 MSM in Beijing, which was set at 0.02 according to the estimates of the HIV epidemic in 2012 and 2013 in Beijing;  
40  
41  $p_1$  represents the HIV prevalence among migrant MSM in Beijing, which was estimated to be higher than  $p_0$  as 0.06,  
42  
43 so the  $n$  was calculated to be 502. Considering the possibility of loss to follow-up, we increased the target sample size  
44  
45 by 10%. A total of 547 participants were screened during the baseline screening survey from September to October  
46  
47 2009, of whom 36 were HIV-positive and 162 were syphilis-positive. In consideration of the curability and reinfection  
48  
49 potential of syphilis, participants who were syphilis-positive at baseline were still recruited in the cohort. Thus, a total  
50  
51 of 511 eligible and consenting MSM were enrolled into the prospective cohort, of whom 141 were syphilis-positive.  
52  
53  
54  
55  
56  
57  
58  
59  
60

1  
2  
3 Participants were followed up for four and eight months after the baseline survey. At each study visit (baseline,  
4  
5 four-month follow-up and eight-month follow-up), eligible participants were interviewed by trained health  
6  
7 professionals in a private room of the study clinic, and blood plasma specimens were collected and analyzed for HIV  
8  
9 and syphilis antibodies by experienced physicians. One week later, each participant received their test results  
10  
11 anonymously by a private identification code. All participants who tested positive for HIV/syphilis received additional  
12  
13 posttest counseling and referrals to relevant free services. Every participant received 50 RMB (7.4 USD), 12 free  
14  
15 condoms and one free lubricant after each completed study visit. Every participant was asked to provide at least two  
16  
17 different and current contact methods, and reminder calls were made before the follow-up day to verify that the exact  
18  
19 time of the visit would be convenient for them. The study protocol and informed consent forms were approved by the  
20  
21 Institutional Review Boards of the National Center for AIDS/STD Control and Prevention of the China Center for  
22  
23 Disease Control and Prevention (Figure 1).  
24  
25  
26  
27  
28  
29  
30  
31  
32

### 33 **Data collection and laboratory tests**

34  
35 Questionnaire-based interviews were conducted on a one-on-one basis in a separate private room of the district clinic.  
36  
37  
38 Data on demographics, sexual behavior and history of STDs were collected. Participants' questionnaires and blood  
39  
40 specimens were linked through assignment of a unique identifier code in the follow-up visits.  
41  
42  
43 Blood specimens were tested for HIV and syphilis infection. HIV infection status was screened by an ELISA (InTec  
44  
45 Products Company, Xiamen, China) screening and confirmed by an HIV-1/2 Western Blot (HIV Blot 2.2 WBTM,  
46  
47 Genelabs Diagnostics, Singapore). Syphilis infection was determined by a rapid plasma reagin (RPR) test (Shanghai  
48  
49 Rongsheng, Shanghai, China) and confirmed using a Treponema pallidum particle assay (TPPA) test (Fujirebio Inc,  
50  
51 Tokyo, Japan).  
52  
53  
54  
55  
56  
57  
58  
59  
60

## Statistical analysis

Questionnaire data were double-entered and then checked for accuracy using EpiData software (The EpiData Association, Odense, Denmark, version 3.1). Data were analyzed using Stata/SE (StataCorp LP, USA, version 12.0 for Windows). HIV seroconversion was estimated to have occurred at the midpoint between the time of the baseline HIV test and the time of the follow-up HIV test with a seropositive result. Syphilis seroconversion was estimated to have occurred at the halfway point between the previous visit and the visit where seroconversion occurred. HIV/syphilis incidence density was calculated based on a Poisson distribution, with number of seroconversion incidents within the follow-up period as the numerator and person-years (PY) over the entire follow-up period as the denominator. Categorical factors associated with retention rate were analyzed by univariate logistic regression, including baseline demographic and behavioral characteristics. A stepwise multiple logistic regression (out 0.05, in 0.02) was used to select independent factors for the retention rate. A Cox regression model was used in univariate and multiple regression analyses to identify correlates of time to HIV seroconversion. Statistically significant variables in univariate analysis ( $P < 0.10$ ) were entered simultaneously into a multivariate Cox proportional hazard regression model to determine the adjusted hazard ratio (aHR) for HIV/syphilis seroconversion-related risk factors.

## RESULTS

### Baseline characteristics of the participants

Among 511 participants, the median age was 29 years; 94.32% belonged to the Han ethnic group; 64.77% were single, 22.90% were married or cohabiting, and 12.33% were separated or divorced or widowed. In terms of education level, 73.19% had received a high school education or lower. About half (54.01%) had monthly incomes  $< 300$ US\$. Participants who identified themselves as exclusively homosexual or as bisexual accounted for 60.67% and 37.57%, respectively. A total of 16.05% and 44.03% of the participants thought it was impossible or improbable they would be



infected with HIV, respectively. The median age of sexual debut was 20 years, and 58.71% experienced their sexual debut with a male. The median age of first anal intercourse was 22, and 58.65% of participants did not use a condom at first anal intercourse. In the past year, 78.67% of the participants had ever received condoms, 65.17% had ever received lubricant, 23.68% had ever taken part in peer education, 18.40% had ever received examination or treatment for STDs and 52.49% had ever received voluntary counseling and testing services (VCTs).

Regarding behaviors in the past six months among participants, the median number of male sex partners was three. For high risk behaviors, 327 (63.99%) had oral sex with male sex partners, 22 (6.73%) of them had consistent condom use with regular sex partners, and 26 (7.95%) with casual partners; 511 (100%) had anal sex with male sex partners, 13.11% of them had consistent condom use with regular sex partners, and 66 (18.70%) with casual partners. A total of 61 (11.94%) participants had ever engaged in commercial sexual behavior, among whom 35 (57.38%) had paid for sex and 43 (70.49%) had received money for sex. A total of 59 (11.55%) had ever engaged in group sex, which happened almost exclusively (96.61%) among males. A total of 166 (32.49%) had ever engaged in sex under the influence of alcohol, among whom 152 (92.77%) had homosexual intercourse while intoxicated (Table 1).

**Table 1. Sociodemographic characteristics of the 511 study participants in the cohort of migrant MSM in Beijing**

| Variables                                  | n   | %     |
|--------------------------------------------|-----|-------|
| Overall, N                                 | 511 | 100   |
| Age (median, years)                        | 29  | -     |
| 18-24                                      | 149 | 29.16 |
| ≥25                                        | 362 | 70.84 |
| Ethnicity                                  |     |       |
| Han                                        | 482 | 94.32 |
| Minority                                   | 29  | 5.68  |
| Marital status                             |     |       |
| Single                                     | 331 | 64.77 |
| Married                                    | 114 | 22.31 |
| Cohabiting with male or female sex partner | 3   | 0.59  |
| Separated or divorced or widowed           | 63  | 12.33 |
| Duration of stay in Beijing                |     |       |
| < 1 year                                   | 173 | 33.85 |

|    |                                                                                |     |       |
|----|--------------------------------------------------------------------------------|-----|-------|
| 1  |                                                                                |     |       |
| 2  | ≥ 1 year                                                                       | 338 | 66.14 |
| 3  | Education level                                                                |     |       |
| 4  | High school and below                                                          | 374 | 73.19 |
| 5  | College and above                                                              | 137 | 26.81 |
| 6  | Monthly income (US\$)                                                          |     |       |
| 7  | < 300                                                                          | 276 | 54.01 |
| 8  | ≥ 300                                                                          | 235 | 45.99 |
| 9  | Self-reported sexual orientation                                               |     |       |
| 10 | Homosexual                                                                     | 310 | 60.67 |
| 11 | Heterosexual                                                                   | 8   | 1.57  |
| 12 | Bisexual                                                                       | 192 | 37.57 |
| 13 | Other                                                                          | 1   | 0.2   |
| 14 | Self-reported risk of HIV infection                                            |     |       |
| 15 | Impossible                                                                     | 82  | 16.05 |
| 16 | Improbable                                                                     | 225 | 44.03 |
| 17 | Possible                                                                       | 74  | 14.48 |
| 18 | Probable                                                                       | 15  | 2.94  |
| 19 | No idea                                                                        | 115 | 22.5  |
| 20 | Age of sexual debut (median,years)                                             | 20  |       |
| 21 | Gender of first sexual partner                                                 |     |       |
| 22 | Male                                                                           | 300 | 58.71 |
| 23 | Female                                                                         | 211 | 41.29 |
| 24 | Age of first anal intercourse(median, years)                                   | 22  |       |
| 25 | Had first anal intercourse before 15 years-old                                 | 13  | 2.54  |
| 26 | Number of male sex partners in the last 6 months (median)                      | 3   |       |
| 27 | Number of female sex partners in the last 6 months (median)                    | 0   |       |
| 28 | Oral sex with regular partners with consistent condom use in the past 6 months | 22  | 6.73  |
| 29 | Oral sex with casual partners with consistent condom use in the past 6 months  | 26  | 7.95  |
| 30 | Anal sex with regular partners with consistent condom use in the past 6 months | 67  | 13.11 |
| 31 | Anal sex with casual partners with consistent condom use in the past 6 months  | 66  | 18.7  |
| 32 | Ever had commercial sexual behavior                                            | 61  | 11.94 |
| 33 | Ever had group sex                                                             | 59  | 11.55 |
| 34 | Alcohol use prior to sex                                                       | 166 | 32.49 |
| 35 | Ever had STDs                                                                  | 84  | 16.44 |
| 36 | Have ever received condoms                                                     | 402 | 78.67 |
| 37 | Have ever received lubricant                                                   | 333 | 65.17 |
| 38 | Have ever received peer education                                              | 121 | 23.68 |
| 39 | Have ever received examination or treatment for STD                            | 94  | 18.4  |
| 40 | Have ever received VCT services                                                | 268 | 52.45 |
| 41 | Have ever received educational materials on AIDS/STD                           | 302 | 59.1  |

---

MSM, men who have sex with men; STD, sexually transmitted disease.

## Incidence of infections of HIV, syphilis, HIV-syphilis co-infection and factors predicting HIV and syphilis seroconversion

During the eight-month follow-up, 16 HIV seroconversions were observed over 204.27 person-years of observation, resulting in an incidence rate of 7.83 per 100 person-years (PY) (95% CI 4.48 to 12.72). At the four-month visit, the incidence of HIV was 8.33 per 100 PY (95% CI 3.81 to 15.81) and at the eight-month visit it was 3.83 per 100 PY (95% CI 1.54 to 7.89). During the eight-month follow-up period, syphilis incidence was 11.11 per 100 PY (95% CI 6.47 to 17.80). At the four-month and eight-month visits, the syphilis incidence was 10.03 per 100 PY (95% CI 4.33 to 19.76) and 15.25 per 100 PY (95% CI 6.97 to 28.94), respectively. Six HIV seroconversion cases were observed becoming syphilis-positive over 52.10 person-years, resulting in an incidence of co-infection of 11.52 per 100 PY (4.23 to 25.07).

Multivariate Cox regression analysis indicated that age  $\leq 15$  years old at first anal intercourse (adjusted hazard ratio (aHR) = 9.20, 95% CI 1.94 to 43.56,  $p=0.050$ ) and ever had group sex (aHR=4.30, 95% CI 1.40 to 13.18,  $p=0.011$ ) were significantly associated with time to HIV seroconversion (Table 2). For syphilis incidence, bisexual orientation (aHR=5.09, 95% CI 1.02 to 25.57,  $p=0.048$ ) and had more than one sex partners since last investigation (aHR=9.22, 95% CI 1.13 to 73.37,  $p=0.038$ ) were significantly identified as risk factors (Table 3).

**Table 2. Multivariate analyses of participant characteristics associated with incident HIV infection among migrant MSM in Beijing**

| Factors                                       | No. of HIV seroconversions | Cumulative PY | HIV incidence (/100PY) | Univariate         |         | Multivariate         |         |
|-----------------------------------------------|----------------------------|---------------|------------------------|--------------------|---------|----------------------|---------|
|                                               |                            |               |                        | HR (95% CI)        | p Value | Adjusted HR (95% CI) | p Value |
| Total                                         | 16                         | 204.27        | 7.83                   |                    |         |                      |         |
| Education                                     |                            |               |                        |                    |         |                      |         |
| Junior college and below                      | 13                         | 143.95        | 9.03                   | 1.00               |         |                      |         |
| Above junior college                          | 3                          | 60.32         | 4.97                   | 0.56(0.16 to 1.98) | 0.370   |                      |         |
| Seeking partner through Internet              |                            |               |                        |                    |         |                      |         |
| NO                                            | 12                         | 109.45        | 10.96                  | 1.00               |         |                      |         |
| YES                                           | 4                          | 94.81         | 4.22                   | 0.39(0.12 to 1.20) | 0.100   |                      |         |
| Age of first anal intercourse (median, years) |                            |               |                        |                    |         |                      |         |

|                                                                                      |    |        |       |                     |       |                     |       |
|--------------------------------------------------------------------------------------|----|--------|-------|---------------------|-------|---------------------|-------|
| ≥15                                                                                  | 14 | 200.99 | 6.97  | 1.00                |       | 1.00                |       |
| <15                                                                                  | 2  | 3.28   | 60.98 | 8.28(1.88 to 36.46) | 0.005 | 9.20(1.94 to 43.56) | 0.005 |
| Ever had group sex                                                                   |    |        |       |                     |       |                     |       |
| NO                                                                                   | 11 | 183.48 | 6     | 1.00                |       | 1.00                |       |
| YES                                                                                  | 5  | 20.78  | 24.06 | 3.95(1.37 to 11.38) | 0.011 | 4.30(1.40 to 13.18) | 0.011 |
| Knowledge of HIV/AIDS was acquired from                                              |    |        |       |                     |       |                     |       |
| Media                                                                                |    |        |       |                     |       |                     |       |
| NO                                                                                   | 12 | 109.65 | 10.94 | 1.00                |       |                     |       |
| YES                                                                                  | 4  | 94.62  | 4.23  | 0.39(0.12 to 1.20)  | 0.100 |                     |       |
| Internet                                                                             |    |        |       |                     |       |                     |       |
| NO                                                                                   | 6  | 108.59 | 5.53  | 1.00                |       |                     |       |
| YES                                                                                  | 10 | 95.68  | 10.45 | 0.38(0.12 to 1.19)  | 0.097 |                     |       |
| Consistent condom use during oral sex with regular partners since last investigation |    |        |       |                     |       |                     |       |
| NO                                                                                   | 1  | 9.45   |       | 1.00                |       |                     |       |
| YES                                                                                  | 15 | 194.82 |       | 0.73(0.10 to 5.50)  | 0.758 |                     |       |
| Consistent condom use during oral sex with casual partners since last investigation  |    |        |       |                     |       |                     |       |
| NO                                                                                   | 0  | 7.70   | 0     | 1.00                |       |                     |       |
| YES                                                                                  | 9  | 128.67 | 6.99  | -                   | -     |                     |       |
| Consistent condom use during anal sex with regular partners since last investigation |    |        |       |                     |       |                     |       |
| NO                                                                                   | 3  | 29.18  | 10.28 | 1.00                |       |                     |       |
| YES                                                                                  | 13 | 175.09 | 7.42  | 0.72(0.21 to 2.53)  | 0.609 |                     |       |
| Consistent condom use during anal sex with casual partners since last investigation  |    |        |       |                     |       |                     |       |
| NO                                                                                   | 2  | 27.56  | 7.26  | 1.00                |       |                     |       |
| YES                                                                                  | 10 | 115.99 | 8.62  | 1.19(0.26 to 5.42)  | 0.825 |                     |       |

PY, person-years; HR, hazard ratio.

**Table 3. Multivariate analyses of participant characteristics associated with incident syphilis infection among migrant MSM in Beijing**

| Factors                                                | No. of syphilis seroconversions | Cumulative PY | Syphilis incidence (/100PY) | Univariate          |         | Multivariate         |         |
|--------------------------------------------------------|---------------------------------|---------------|-----------------------------|---------------------|---------|----------------------|---------|
|                                                        |                                 |               |                             | HR (95% CI)         | p Value | Adjusted HR (95% CI) | p Value |
| Total                                                  | 17                              | 152.95        | 11.11                       |                     |         |                      |         |
| Ever had female sex partner(s)                         |                                 |               |                             |                     |         |                      |         |
| No                                                     | 9                               | 96.89         | 9.29                        | 1.00                |         |                      |         |
| Yes                                                    | 8                               | 54.64         | 14.64                       | 5.56(1.10 to 27.05) | 0.038   | 5.09(1.02 to 25.57)  | 0.048   |
| Other                                                  | 0                               | 0             | -                           | -                   |         |                      |         |
| Number of female sex partners since last investigation |                                 |               |                             |                     |         |                      |         |
| ≤1                                                     | 16                              | 149.9         | 10.67                       | 1.00                |         |                      |         |
| ≥2                                                     | 1                               | 3.05          | 32.79                       | 9.22(1.13 to 75.37) | 0.038   |                      |         |
| Seeking partners in bar/dancing hall/tearoom/chamber   |                                 |               |                             |                     |         |                      |         |
| NO                                                     | 11                              | 129.41        | 8.5                         | 1.00                |         |                      |         |
| YES                                                    | 6                               | 23.55         | 25.48                       | 3.12(0.75 to 13.07) | 0.119   |                      |         |

|                                                                                  |    |        |       |                     |       |  |
|----------------------------------------------------------------------------------|----|--------|-------|---------------------|-------|--|
| Consistent condom use during oral sex with regular partners in the past 6 months |    |        |       |                     |       |  |
| NO                                                                               | 1  | 6.24   | 16.03 | 1.00                |       |  |
| YES                                                                              | 16 | 146.71 | 10.91 | 0.24(0.03 to 1.99 ) | 0.188 |  |
| Consistent condom use during oral sex with casual partners in the past 6 months  |    |        |       |                     |       |  |
| NO                                                                               | 0  | 4.37   | 0     | 1.00                |       |  |
| YES                                                                              | 8  | 92.58  | 8.64  | -                   |       |  |
| Consistent condom use during anal sex with regular partners in the past 6 months |    |        |       |                     |       |  |
| NO                                                                               | 2  | 24.52  | 8.16  | 1.00                |       |  |
| YES                                                                              | 15 | 128.43 | 11.68 | 0.57(0.11 to 2.80)  | 0.485 |  |
| Consistent condom use during anal sex with casual partners in the past 6 months  |    |        |       |                     |       |  |
| NO                                                                               | 0  | 19.80  | 0     | 1.00                |       |  |
| YES                                                                              | 11 | 83.21  | 13.22 | -                   |       |  |

### Predictors of cohort retention

Of the 511 participants, 60.3% (308) were retained in the cohort at the four-month follow-up and 54.6% (274) were retained at the eight-month follow-up.

Univariate factors among baseline characteristics which were significantly associated with four-month retention were analysed with stepwise multiple logistic regression. Four factors were kept in the final model, including age > 25 years old (adjusted odds ratio (AOR) = 1.81, 95% CI 1.07 to 3.06,  $p = 0.026$ ), living in Beijing for more than one year (AOR = 3.68, 95% CI 2.04 to 6.64,  $p < 0.001$ ), had at least one female sex partner since last investigation (AOR = 0.48, 95% CI 0.29 to 0.80,  $p = 0.005$ ), and had ever received VCTs in the past 12 months (AOR = 1.71, 95% CI 1.07 to 2.72,  $p < 0.024$ ) (Table 4).

**Table 4. Factors associated with four-month retention rate in a cohort study of migrant MSM in Beijing, China, using stepwise multiple logistic analysis**

| Factor                      | N   | Retention rate % (n) | OR (95% CI)        | p Value | Adjusted OR (95% CI) | p Value |
|-----------------------------|-----|----------------------|--------------------|---------|----------------------|---------|
| Age                         |     |                      |                    |         |                      |         |
| 18-24                       | 149 | 46.98(70)            | 1.00               |         | 1.00                 |         |
| ≥25                         | 362 | 65.75(238)           | 2.17(1.47 to 3.19) | <0.001  | 1.81(1.07 to 3.06)   | 0.026   |
| Duration of stay in Beijing |     |                      |                    |         |                      |         |
| < 1 year                    | 95  | 34.74(33)            | 1.00               |         | 1.00                 |         |
| ≥ 1 year                    | 416 | 66.27(208)           | 3.66(2.29 to 5.85) | <0.001  | 3.68 (2.04 to 6.64)  | <0.001  |

|                                                        |     |             |                    |        |                    |       |
|--------------------------------------------------------|-----|-------------|--------------------|--------|--------------------|-------|
| Number of female sex partners since last investigation |     |             |                    |        |                    |       |
| 0                                                      | 382 | 64.66 (247) | 1.00               |        | 1.00               |       |
| ≥1                                                     | 129 | 47.29 (61)  | 0.49(0.33 to 0.74) | 0.001  | 0.48(0.29 to 0.80) | 0.005 |
| Have received VCT service in the past 12 months        |     |             |                    |        |                    |       |
| No                                                     | 243 | 51.85 (126) | 1.00               |        | 1.00               |       |
| Yes                                                    | 268 | 67.91 (182) | 1.97(1.37 to 2.81) | <0.001 | 1.71(1.07 to 2.72) | 0.024 |

For eight-month retention, age > 25 years old (AOR = 1.76, 95% CI 1.16 to 2.68, p = 0.008), living in Beijing for more than one year (AOR = 1.68, 95% CI 1.03 to 2.73, p = 0.039), first sexual partner was female (AOR = 0.60, 95% CI 0.41 to 0.88, p = 0.009), ever had group sex (AOR = 0.50, 95% CI 0.28 to 0.89, p = 0.019), and had received lubricant in the past 12 months (AOR = 2.31, 95% CI 1.56 to 3.42, p < 0.001 ) were retained in the final model using stepwise multiple logistic regression analysis (Table 5).

**Table 5. Factors associated with eight-month retention rate in a cohort study of migrant MSM in Beijing, China, using stepwise multiple logistic analysis**

| Factor                                        | N   | Retention rate % (n) | OR (95% CI)        | p Value | Adjusted OR (95% CI) | p Value |
|-----------------------------------------------|-----|----------------------|--------------------|---------|----------------------|---------|
| Age                                           |     |                      |                    |         |                      |         |
| 18-24                                         | 149 | 44.30(66)            | 1.00               |         | 1.00                 |         |
| ≥25                                           | 362 | 57.18(207)           | 1.68(1.14 to 2.47) | 0.008   | 1.76(1.16 to 2.68)   | 0.008   |
| Duration of stay in Beijing                   |     |                      |                    |         |                      |         |
| < 1 year                                      | 78  | 48.72 (38)           | 1.00               |         | 1.00                 |         |
| > 1 year                                      | 338 | 58.88 (199)          | 2.17(1.37 to 3.43) | <0.001  | 1.68 (1.03 to 2.73)  | 0.039   |
| Gender of the first sexual partner            |     |                      |                    |         |                      |         |
| Male                                          | 300 | 58.33 (175)          | 1.00               |         | 1.00                 |         |
| Female                                        | 211 | 46.45 (98)           | 0.62(0.43 to 0.88) | 0.008   | 0.60 (0.41 to 0.88)  | 0.009   |
| Ever had group sex                            |     |                      |                    |         |                      |         |
| NO                                            | 452 | 54.87 (248)          | 1.00               |         | 1.00                 |         |
| YES                                           | 59  | 42.37 (25)           | 0.61(0.35 to 1.05) | 0.072   | 0.50 (0.28 to 0.89)  | 0.019   |
| Have received lubricant in the past 12 months |     |                      |                    |         |                      |         |
| NO                                            | 109 | 34.86 (38)           | 1.00               |         | 1.00                 |         |
| YES                                           | 402 | 58.46 (235)          | 2.59(1.78 to 3.77) | <0.001  | 2.31 (1.56 to 3.42)  | <0.001  |

## DISCUSSION

1  
2  
3 Our study found that the prevalence of HIV (6.58%) among migrant MSM was at a highly epidemic level, which was  
4  
5 remarkable compared to that of a previous study among the general migrant population (0%) in Beijing.<sup>23</sup> Additionally,  
6  
7 it was higher than the 4.8% in 2007 among general MSM in Beijing.<sup>24</sup> A similar result (5.9%) was found in a recent  
8  
9 cross-sectional study among migrant MSM.<sup>23</sup> Incidence in this subgroup (7.83/100PY) was consistent with that of  
10  
11 migrant MSM (8.51/100PY) in a MSM cohort study in Beijing, and higher than the incidence of permanent resident  
12  
13 MSM.<sup>25</sup> It was also higher than the incidence of general MSM in different parts of China.<sup>6, 7</sup>

14  
15  
16  
17  
18 The study found that participants whose first anal intercourse occurred before age 15 had significantly higher risk for  
19  
20 HIV seroconversion. An American study of young minority MSM found that study participants who had an MSM  
21  
22 sexual debut before 16 years old were more likely to have psychological problems and high risk behaviors like  
23  
24 exchanging sex and drug use.<sup>26</sup> Early sexual debut could have a deep and long-term influence on individuals' attitudes  
25  
26 towards sex, but appropriate sex education has generally been shunned in traditional Chinese education. Our study  
27  
28 indicated that early sex education should be combined with Chinese characteristics, and relevant measures need to be  
29  
30 implemented as soon as possible. Another risk factor significantly associated with HIV incidence was ever had group  
31  
32 sex. An explanation of this observation is that psychological stress caused by stigma and discrimination hinders the  
33  
34 development of longer-term relationships between MSM,<sup>27</sup> and having sex with multiple partners increases the chance  
35  
36 of HIV transmission. This indicates a need for confidentiality and supportive service for migrant MSM. Serious  
37  
38 attention should also be paid to the prevalence of STDs. The prevalence rate of syphilis (29.62%) was higher than in  
39  
40 previous studies conducted among MSM in Beijing, such as 19.8% in 2007<sup>24</sup> and 22.0% in 2009.<sup>10</sup> The incidence of  
41  
42 syphilis (11.11/100PY) was also extremely high compared to 8.06/100PY in a cohort study among MSM during the  
43  
44 same period in 2009.<sup>25</sup> High prevalence of syphilis among MSM is a common risk factor for encouraging HIV infection  
45  
46 because of the biological and behavioral links between syphilis and HIV.<sup>28</sup>

47  
48  
49  
50  
51  
52  
53  
54  
55  
56 The multiple regression analysis significantly revealed that self-identified bisexuals were five times more likely than  
57  
58  
59  
60

1  
2  
3 homosexuals to be infected with syphilis. One major reason for this outcome could be that MSM who had had sex with  
4  
5 females may have more varied sexual behaviors with a wider range of sexual partners, including males and females. In  
6  
7 addition, a cross-sectional study among young migrant MSM in Beijing discovered that MSM who were engaged in  
8  
9 bisexual behavior had a higher rate of unprotected sex with stable female partners and were less likely to take part in  
10  
11 preventive behaviors,<sup>18</sup> which was consistent with our finding that those who had at least one female sex partner and  
12  
13 those whose first sexual partner was female were significantly more likely to be lost at four-month and eight-month  
14  
15 follow-up visits, respectively. MSM face strong social pressure and stigma in China, which may lead them to hide their  
16  
17 sexual orientation by unwillingly engaging in heterosexual relationships; thus, many Chinese MSM will potentially  
18  
19 enter a heterosexual marriage due to social and familial pressure.<sup>4</sup> Concerned about disclosing their MSM behavior to  
20  
21 their female partners, bisexual MSM may be more reluctant to be followed up. Also, MSM with female partners are  
22  
23 more likely to be engaged in risk behaviors, such as having unprotected sex to demonstrate loyalty to their female  
24  
25 partners and having commercial or casual sex with men. Moreover, only 18.4% of the participants reported having  
26  
27 received an examination or treatment for sexually transmitted diseases in the past 12 months, which may be related to  
28  
29 the high cost of health services and low coverage of health insurance for the migrant population.<sup>18</sup> Low risk-awareness  
30  
31 might be another reason for their lower access to HIV/STD test and treatment. All of these emphasize an urgent need  
32  
33 for widespread and accurate syphilis screening and affordable treatment for migrant MSM in Beijing.  
34  
35

36  
37  
38 In our study, the retention rate was lower than previous cohort studies implemented among general MSM in Beijing  
39  
40 (86.2% in 2007, 86.8% in 2009).<sup>25,26</sup> From the multiple regression analysis, participants who were less than 25 years  
41  
42 old were more likely to be lost at both four-month and eight-month follow-up visits. Similar problems have occurred  
43  
44 among studies of young MSM in the US.<sup>29</sup> A plausible reason for this observation was that many young people in China  
45  
46 have poor knowledge of safe sexual behaviors. Traditional interventions are more pragmatic but less attractive and  
47  
48 appropriate for young people. A qualitative investigation implemented among young MSM in Milwaukee and Detroit  
49  
50  
51  
52  
53  
54  
55  
56  
57  
58  
59  
60



1  
2 offered some new approaches, such as combining HIV/AIDS care intervention with their daily lives and helping solve  
3  
4 problems of social relationships bothering young MSM.<sup>30</sup> However, as Chinese young MSM are almost certainly  
5  
6 different from Americans in some aspects, measures of intervention among young MSM in Beijing deserve further  
7  
8 investigation.  
9  
10

11  
12 As for positive predictors, we found those who had been in Beijing for more than one year or who had received  
13  
14 lubricant were more likely to be maintained in this cohort at both four-month and eight-month follow-up visits. As these  
15  
16 services are provided by local communities, we found similar results in Yangzhou.<sup>8</sup> Migrant MSM who stay longer in  
17  
18 Beijing may have more chances to receive effective and stable intervention services, and the potential impact on their  
19  
20 increasing awareness of self-protection might encourage them to pay closer attention to advances in research. As a  
21  
22 result, migrants may be more likely to remain with the investigation to show their support. However, the data showed  
23  
24 that receiving VCT service in the past 12 months was a positive factor at the four-month follow-up visit, which was  
25  
26 replaced by receiving lubricant at the eight-month visit. This indicates that factors associated with retention rate may  
27  
28 change as time goes on, which implies that we should adjust methods for interventions over time so as to keep the  
29  
30 entire cohort more stable. From the results of our study, the coverage of intervention on this population was limited.  
31  
32 Aimed at the mobility problem inherent to migrant populations, a specific strategy of intervention targeted at migrant  
33  
34 MSM is imminently needed.  
35  
36  
37

38  
39 This study has a number of limitations. Firstly, retention rates were relatively low, which means that the estimates of  
40  
41 HIV/syphilis seroconversions may be biased because no evidence showed a balance between participants retained in  
42  
43 the study and those lost to follow-up. Secondly, using non-random sampling methods may have led to selection bias.  
44  
45 Thirdly, the sample size was insufficient, and some potentially relevant factors may be concealed by the small sample  
46  
47 size. Lastly, the study subjects were all inflow population and did not include outflow population, and the proportion of  
48  
49 migrants from different provinces varied. There is no evidence to show the data could be generalized to other regions.  
50  
51  
52  
53  
54  
55  
56  
57  
58  
59  
60

1  
2  
3 To our knowledge, this is the first cohort study to assess incidence of HIV and syphilis among migrant MSM in Beijing.  
4  
5 With highly prevalent risk behaviors, the migrant MSM had a high level of HIV incidence, and the epidemic of syphilis  
6  
7 among this subgroup was extremely serious. Bisexual MSM were at a high risk of syphilis seroconversion, and were  
8  
9 more concealed among migrant MSM. Future prevention efforts should include screening and appropriate treatment for  
10  
11 syphilis. Multiple modes of intervention services need to be improved and implement for this marginalised group. For  
12  
13 the sake of bisexual MSM's health, as well as for their partners', more attention need to be paid on female partners of  
14  
15 bisexual MSM to encourage them to take test and be followed-up. A greater understanding of risk behaviors and the  
16  
17 HIV/STD epidemic among migrant MSM needs to be investigated in the future.  
18  
19  
20  
21  
22  
23  
24  
25  
26  
27  
28  
29  
30  
31  
32  
33  
34  
35  
36  
37  
38  
39  
40  
41  
42  
43  
44  
45  
46  
47  
48  
49  
50  
51  
52  
53  
54  
55  
56  
57  
58  
59  
60

## ACKNOWLEDGEMENTS

This work was supported in part by Natural Science Foundation of China (81001288, 11171268), National S&T Major Project Foundation of China (No. 2012ZX10001-001 and No. 2011ZX10004-902), Priority Academic Program Development of Jiangsu Higher Education Institutions (PAPD).

The funders had no role in study design, data collection and analysis, decision to publish, or preparation of the manuscript.

## CONTRIBUTORS

ZP, RY and NW conceived and designed the experiments, HL and LW performed the experiments, HM and WM analyzed the data, HZ and YZ contributed reagents/materials/analysis tools, HM, WM and ZP wrote the paper, and all authors read and approved the final version of the manuscript.

## COMPETING INTERESTS

The authors have no conflict of interest to declare.

## Data sharing statement

No additional data available.

## REFERENCES

1. Jia Z, Wang L, Chen R Y, *et al.* Tracking *the* evolution of HIV/AIDS in China from 1989–2009 to inform future prevention and control efforts. *PLoS One* 2011; **6**: e25671.
2. National Center for STD/AIDS Prevention and Control, Chinese Center for Disease Prevention and Control, *Epidemic of HIV/AIDS and sexual transmitted diseases and main progression on prevention in 2011, China.* Beijing: Chinese Center for Disease Control and Prevention, 2012.
3. Ministry of Health of the People's Republic of China, UNAIDS, WHO. *National report for HIV/AIDS estimation in China, 2011.* Beijing: Chinese Center for Disease Control and Prevention, 2011.
4. Chow EPF, Lau JTF, Zhuang X, *et al.* HIV Prevalence Trends, Risky Behaviours, and Governmental and Community Responses to the Epidemic among Men Who Have Sex with Men in China. *BioMed research international* 2014;**2014**:607261.
5. Lu F, Fu J, Zhang R, *et al.* Analysis of HIV epidemic situation and immigrant population. *Infect Dis Info* 2006;**19**:259-61.
6. Xu J, An M, Han X, *et al.* Prospective cohort study of HIV incidence and molecular characteristics of HIV among men who have sex with men(MSM) in Yunnan Province, China. *BMC Infect Dis* 2013;**13**:3.
7. Xu J, Zhang M, Brown K, *et al.* Syphilis and HIV seroconversion among a 12-month prospective cohort of men who have sex with men in Shenyang, China. *Sex Transm Dis* 2010;**37**:432-9.
8. Peng Z, Yang H, Norris J, *et al.* HIV Incidence and Predictors Associated with Retention in a Cohort of Men Who have Sex with Men in Yangzhou, Jiangsu Province, China. *PloS One* 2012;**7**:e52731.
9. Yang H, Tang W, Xiao Z, *et al.* Worsening Epidemic of HIV and Syphilis Among Men Who Have Sex With Men in Jiangsu Province, China. *Clin Infect Dis* 2014;**58**:1753-9.

10. Fan S, Lu H, Ma X, *et al.* Behavioral and serologic survey of men who have sex with men in Beijing, China: implication for HIV intervention. *AIDS Patient Care STDS* 2012;**26**:148-55.
11. Feng L, Ding X, Lu R, *et al.* High HIV prevalence detected in 2006 and 2007 among men who have sex with men in China's largest municipality: An alarming epidemic in Chongqing, China. *J Acquir Immune Defic Syndr* 2009;**52**:79-85.
12. Berg CJ, Nehl EJ, Wong FY, *et al.* Prevalence and correlates of tobacco use among a sample of MSM in Shanghai, China. *Nicotine Tob Res* 2011;**13**:22-8.
13. Liu H, Yang H, Li X, *et al.* Men who have sex with men and human immunodeficiency virus/sexually transmitted disease control in China. *Cell Res* 2005;**15**:858.
14. Lau JT, Wang M, Wong HN, *et al.* Prevalence of bisexual behaviors among men who have sex with men (MSM) in China and associations between condom use in MSM and heterosexual behaviors. *Sex Transm Dis* 2008;**35**:406-13.
15. He N, Wong FY, Huang ZJ, *et al.* HIV risks among two types of male migrants in Shanghai, China: money boys vs. general male migrants. *AIDS* 2007;**21**:S73-9.
16. Yang X, Derlega VJ, Luo H. Migration, behaviour change and HIV/STD risks in China. *AIDS Care* 2007;**19**:282-8.
17. Yang X. Temporary migration and HIV risk behaviors in China. *Environment and Planning A* 2006;**38**:1527.
18. Peng Y, Chang W, Zhou H, *et al.* Factors associated with health-seeking behavior among migrant workers in Beijing, China. *BMC Health Serv Res* 2010;**10**:69.
19. Shi TX, Zhang BC, Li XF, *et al.* Study on the high risk behaviors related to AIDS among men who having sex with men in the floating population. *Chin J Epidemiol* 2009;**30**:668.
20. Newly reported HIV/AIDS cases increase 24.3% per year in Beijing. Retrieved from <http://>

- 1  
2  
3 [health.sina.com.cn/news/2013-11-29/0921114941.shtml](http://health.sina.com.cn/news/2013-11-29/0921114941.shtml) (accessed 31 May 2014).  
4  
5  
6  
7  
8  
9  
10  
11  
12  
13  
14  
15  
16  
17  
18  
19  
20  
21  
22  
23  
24  
25  
26  
27  
28  
29  
30  
31  
32  
33  
34  
35  
36  
37  
38  
39  
40  
41  
42  
43  
44  
45  
46  
47  
48  
49  
50  
51  
52  
53  
54  
55  
56  
57  
58  
59  
60
21. Wang B, Li X, Stanton B, *et al.* Socio-demographic and behavioral correlates for HIV and syphilis infections among migrant men who have sex with men in Beijing, China. *AIDS Care* 2013;**25**:249-57.
  22. Guo Y, Li X, Song Y, *et al.* Bisexual behavior among Chinese young migrant men who have sex with men: implications for HIV prevention and intervention. *AIDS Care* 2012;**24**:451-8.
  23. Xia DY, Lu HY, Liu GW, *et al.* Prevalence of HIV infection, syphilis, HCV and risk behaviors among migrant population in Beijing. *Chin J AIDS STD* 2011;**17**:430-3.
  24. Ruan Y, Luo F, Jia Y, *et al.* Risk factors for syphilis and prevalence of HIV, hepatitis B and C among men who have sex with men in Beijing, China: implications for HIV prevention. *AIDS Behav* 2009;**13**:663-70.
  25. Li D, Li S, Liu Y, *et al.* HIV incidence among men who have sex with men in Beijing: a prospective cohort study. *BMJ Open* 2012;**2**:e001829.
  26. Outlaw AY, Phillips G, Hightow-Weidman LB, *et al.* Age of MSM sexual debut and risk factors: results from a multisite study of racial/ethnic minority YMSM living with HIV. *AIDS Patient Care STDS* 2011;**25**:S23-9.
  27. Neilands TB, Steward WT, Choi KH. Assessment of stigma towards homosexuality in China: a study of men who have sex with men. *Arch Sex Behav* 2008;**37**:838-44.
  28. Guo H, Wei JF, Yang H, *et al.* Rapidly increasing prevalence of HIV and syphilis and HIV-1 subtype characterization among men who have sex with men in Jiangsu, China. *Sex Transm Dis* 2009; **36**:120-125.
  29. Galvin SR, Cohen MS. The role of sexually transmitted diseases in HIV transmission. *Nat Rev Microbiol* 2004;**2**:33-42.
  30. Hightow-Weidman LB, Jones K, Wohl AR, *et al.* Early linkage and retention in care: findings from the outreach, linkage, and retention in care initiative among young men of color who have sex with men. *AIDS Patient Care STDS* 2011;**25**:S31-8.

1  
2  
3  
4  
5  
6  
7  
8  
9  
10  
11  
12  
13  
14  
15  
16  
17  
18  
19  
20  
21  
22  
23  
24  
25  
26  
27  
28  
29  
30  
31  
32  
33  
34  
35  
36  
37  
38  
39  
40  
41  
42  
43  
44  
45  
46  
47  
48  
49  
50  
51  
52  
53  
54  
55  
56  
57  
58  
59  
60

**Figure legend:**

Figure 1. Study flowchart of the migrant MSM cohort, with focus on HIV and syphilis incidence.

For peer review only

1  
2  
3  
4  
5 High Incidence of HIV and syphilis among Migrant Men Who have Sex with  
6  
7  
8 Men in Beijing, China: A Prospective Cohort Study  
9

10 Hengyi Mao<sup>1#</sup>, Wenzhe Ma<sup>1#</sup>, Hongyan Lu<sup>2</sup>, Lu Wang<sup>3</sup>, Hui Zheng<sup>1</sup>, Yingying Zhu<sup>1</sup>, Zhihang Peng<sup>1\*</sup>,

11  
12 Rongbin Yu<sup>1</sup>, Ning Wang<sup>3\*</sup>  
13  
14  
15  
16  
17  
18  
19  
20

- 21 1. Department of Epidemiology & Biostatistics, School of Public Health, Nanjing Medical University,  
22  
23 Nanjing, China;  
24  
25  
26 2. Department of STDs/AIDS Prevention and Control, Beijing Center for Disease Prevention and Control, Beijing,  
27  
28 China;  
29  
30  
31 3. National Center for AIDS/STD Control and Prevention, Chinese Center for Disease Control and Prevention,  
32  
33 Beijing, China.  
34  
35

36 #These authors contributed equally to this work  
37

38 \*Corresponding author  
39

40  
41 Postal address: 818th east Tianyuan Road, Nanjing, China;  
42

43  
44 E-mail: zhihangpeng@njmu.edu.cn; wangning\_12@126.com  
45

46  
47 Tel: 86-25-86868436;  
48

49  
50 Fax: 86-25-86868499.  
51  
52  
53

54 **Keywords:** HIV; syphilis; male homosexuality; cohort study; China  
55  
56  
57  
58

59 **Word Count:** 3613  
60



## ABSTRACT

**Objectives:** The purpose of the study was to investigate the incidence of HIV and syphilis and their related factors, as well as to examine the predictors associated with seroconversion among migrant men who have sex with men in Beijing, China.

**Design:** Prospective cohort study.

**Setting:** Beijing, China.

**Participants:** 511 HIV-negative migrant MSM.

**Primary and secondary outcome measures:** Sociodemographic and behavioral information of participants, HIV and syphilis incidence rates, and factors associated with HIV/syphilis seroconversion and cohort retention.

**Results:** Of the 511 participants, 60.3% (308) and 52.4% (273) were retained at the four-month and eight-month follow-up visits, respectively. The HIV and syphilis incidence rates were 7.83 (95% CI 4.48 to 12.72) and 11.11 (95% CI 6.47 to 17.80) cases per 100 person-years, respectively. HIV seroconversion was significantly associated with had first anal intercourse at age 15 or younger (adjusted hazard ratio (aHR) = 9.20, 95% CI 1.94 to 43.56) and ever had group sex (aHR = 4.30, 95% CI 1.40 to 13.18). Bisexual orientation (aHR = 5.09, 95% CI 1.02 to 25.57) was significantly associated with syphilis seroconversion. Predictors associated with both four-month and eight-month retention rates included age  $\geq$  25 years old and living in Beijing for more than one year.

**Conclusions:** The high incidence of HIV and syphilis among migrant MSM are a cause for concern. A comprehensive strategy should be implemented to maintain a higher retention rate among migrant MSM.

### Strengths and limitations of this study

- First cohort study to assess incidence of HIV and syphilis among migrant MSM in Beijing.
- Cox regression analysis and stepwise multiple logistic regression were used to identify factors associated with

1  
2  
3 HIV/syphilis seroconversion and cohort retention, respectively.

- 4 ● Retention rates were relatively low, which means that the estimates of HIV/syphilis seroconversions may be biased  
5 because no evidence showed a balance between those retained in the study and those lost to follow-up.  
6  
7
- 8 ● Sampling methods may have led to selection bias.  
9
- 10 ● No outflow population was included, and the proportions of migrants from different provinces varied, which may  
11 lead to difficulties with generalization of the data.  
12  
13  
14  
15  
16  
17  
18  
19

## 20 INTRODUCTION

21  
22 In China ~~during over~~ the last decade, sexual transmission has become the ~~major dominant~~ route ~~for of~~ HIV  
23 transmission.<sup>1</sup> ~~As an increasing proportion of infections among people living with HIV/AIDS (PLWHA), e~~Cases  
24 attributed to homosexual transmission rose from 7.3% in 2005 to 16.1% in 2011, forming an increasing proportion of  
25 infections among people living with HIV/AIDS (PLWHA).<sup>2</sup> ~~The In the~~ 2011 HIV epidemic assessment report ~~showed~~  
26 ~~that among the estimated 780,000 people living with HIV/AIDS,~~ homosexual transmissions accounted for 17.4% of  
27 infections among the estimated 780,000 people living with HIV/AIDS, an increase from 14.7% in 2009.<sup>3</sup> A growing  
28 number of studies have revealed an upward trend of HIV incidence among MSM in different parts of China. For  
29 example, incidence increased from 8.0 to 15.4 per 100 person-years during 2006–2009 in Chongqing, from 5.1 to 10.2  
30 per 100 person-years during 2007–2009 in Liaoning, from 5.7 to 8.2 per 100 person-years during 2008–2011 in Jiangsu  
31 and from 3.5 to 6.3 per 100 person-years during 2010–2012 in Zhejiang.<sup>4</sup>  
32  
33  
34  
35  
36  
37

38 In recent years, there has been growing awareness that internal migration within China may be shifting the HIV  
39 epidemic by broadening social integration and connecting populations from different regions through sexual networks.<sup>1</sup>  
40  
41  
42

43 Data from national behavioral surveillance ~~during from~~ 2004–2005 showed that in nine mainland provinces, migrant  
44 HIV/AIDS cases accounted for more than 50% of total infections ~~in nine mainland provinces.~~<sup>5</sup> ~~Numbers A number~~ of  
45  
46  
47  
48  
49  
50  
51  
52

1 cohort ~~study studies~~ on MSM have been implemented in China ~~to that~~ reveal an HIV epidemic among MSM, ~~however~~  
2  
3 ~~but in most of these studies the MSM~~ retentions ~~of MSM were was~~ not ~~so very~~ high ~~in most of them~~. Retentions  
4  
5 ~~Retention rates for~~ these cohort studies ~~can are hardly rarely~~ maintained over 70% at 12-months follow-up, ~~and a~~ few  
6  
7 of them ~~were~~ even below 20%.<sup>6-9</sup> ~~There are r~~Reasons for ~~these~~ low ~~retention~~ rates, ~~and may include~~ migration of MSM  
8  
9 ~~may be an important one~~.<sup>8</sup> Moreover, studies implemented among urban MSM also revealed a high proportion of  
10  
11 migrants among MSM in major cities, such as in Beijing (88%),<sup>10</sup> Chongqing (80.3%)<sup>11</sup> and Shanghai (79.7%).<sup>12</sup>  
12  
13 Although migration itself does not spread HIV or other sexually transmitted diseases (STDs), it may increase the  
14  
15 possibility of infection when combined with high risk behaviors, which are prevalent among MSM. It has been  
16  
17 confirmed in numerous studies that high risk behaviors such as unprotected anal sex, commercial sex, group sex, casual  
18  
19 sex and having multiple sexual partners are prevalent among MSM in China.<sup>13-15</sup> On the other hand, perceived stigma  
20  
21 and discrimination due to traditional Chinese culture and conservative social values have increasingly led Chinese  
22  
23 MSM to ~~disguise their sexual orientation~~ ~~get married with a marry~~ ~~female sexual partners with matrimony~~, which leads  
24  
25 to a potential risk of transmitting HIV to the general population via heterosexual transmission.<sup>14</sup> As for migrants,  
26  
27 lacking the stability of a family or a home community and ~~with hampered by~~ generally low educational levels, limited  
28  
29 knowledge of HIV/AIDS prevention, and discrimination and marginalization from the mainstream metropolitan society,  
30  
31 high risk behaviors may occur more frequently.<sup>16, 17</sup> Furthermore, due to China's household registration system and  
32  
33 urban social security system, migrants have limited access to comprehensive, convenient and long-term health  
34  
35 services.<sup>18</sup> Recently, some cross-sectional studies in China demonstrated that compared to local MSM, migrant MSM  
36  
37 engage in more high risk sexual behaviors such as multiple sexual partners, higher frequencies of anal and oral  
38  
39 intercourse, and unprotected sexual behaviors with both males and females.<sup>15, 19</sup> As a marginal and vulnerable  
40  
41 subpopulation, migrant MSM should be accorded a high level of consideration by researchers.  
42  
43  
44  
45  
46  
47  
48  
49  
50  
51  
52  
53  
54

55 Beijing, the capital of China and a center of political, economic and cultural activity, is a magnet for the migrant  
56  
57  
58  
59  
60

1  
2  
3 population. In 2012, Beijing's metropolitan population included some 7.7 million migrants, with ~~the~~-migrants  
4  
5 ~~population~~-accounting for 37.4% of the total population of Beijing (China National Bureau of Statistics, 2013).

6  
7  
8 According to statistics from the Beijing Municipal Bureau of Health, the proportion of MSM ~~in~~-among HIV/AIDS  
9  
10 cases increased from 22.8% in 2006 to 69.1% at the end of October 2013.<sup>20</sup> In addition, prior research among MSM in  
11  
12 Beijing revealed that with the increasing epidemic of HIV among MSM in recent years, the number of migrants among  
13  
14 recruited participants also showed a ~~remarkable~~-noticeable upward trend.<sup>10,11</sup> This phenomenon implies the following:

15  
16  
17 (1) migrant MSM play a main role in MSM society in Beijing; (2) this marginal population emerged gradually with the  
18  
19 constant improvement of sampling methods; and (3) more targeted studies of this subpopulation are urgently needed,  
20  
21  
22 ~~while~~-since at present only a few cross-sectional studies have been conducted to investigate ~~its~~-their HIV/STD  
23  
24 infections and relative risk factors.<sup>21,22</sup> Thus, the purpose of this research was to assess the incidence of HIV and  
25  
26 syphilis and examine the predictors associated with seroconversion and retention in a prospective cohort study among  
27  
28 migrant MSM in Beijing, China.  
29  
30  
31  
32  
33  
34

## 35 METHODS

### 36 Study Design and Study Population

37  
38  
39 This prospective cohort study was conducted in Beijing. Participants were all Chinese citizens and were recruited  
40  
41 through three methods. First, study participants were recruited directly through website advertisements by a  
42  
43 nongovernmental AIDS volunteer group (<http://www.hivolunt.net>). Second, peer recruiters were hired and trained to  
44  
45 distribute flyers with study-related information at MSM-frequented venues (e.g., MSM clubs, bars, parks and  
46  
47 bathhouses). Thirdly, study participants were encouraged to refer their peers to enroll in the study. Once a potential  
48  
49 participant had been referred or identified, local research team members approached the individual to verify eligibility,  
50  
51  
52 which included age  $\geq 18$  years old, male ~~individual~~gender, HIV-negative, had sex with another male in the past 12  
53  
54  
55  
56  
57  
58  
59  
60

months, lacked permanent household registration in Beijing and provided written informed consent.

We calculated the sample size using the equation 
$$n = \frac{(z_{\alpha}\sqrt{2pq} + z_{\beta}\sqrt{p_0q_0 + p_1q_1})^2}{(p_1 - p_0)^2}$$
 to calculate the sample

size, where  $\alpha$  and  $\beta$  are 0.05 and 0.10, and the corresponding  $z_{\alpha}$  and  $z_{\beta}$  are 1.96 and 1.282.  $p_0$  represents the prevalence of HIV among general MSM in Beijing, which was set to be 0.02 according to the estimations of the HIV epidemic in 2012 and 2013 in Beijing;  $p_1$  represents the HIV prevalence among migrant MSM in Beijing, which was estimated to be higher than  $p_0$  as 0.06, thus the  $n$  was calculated to be 502. Considering the possibility of loss to follow-up, we increased the target sample size by 10%. A total of 547 participants were screened during the baseline

screening survey from September to October 2009, of whom 36 were HIV-positive and 162 were syphilis-positive. In consideration of the curability and ~~repeatability-reinfection potential~~ of syphilis ~~infection~~, participants who were syphilis-positive at baseline were still recruited in the cohort. Thus, a total of 511 eligible and consenting MSM were enrolled into the prospective cohort, of whom 141 were syphilis-positive. Participants were followed up for four and eight months after the baseline survey. At each study visit (baseline, four-month follow-up and eight-month follow-up), eligible participants were interviewed by trained health professionals in a private room of the study clinic, and blood plasma specimens were collected and analyzed for HIV and syphilis antibodies by experienced physicians. One week later, each participant received their test results anonymously by a private identification code. All participants who tested positive for HIV/syphilis received additional posttest counseling and referrals to relevant free services. Every participant received 50 RMB (7.4 USD), 12 free condoms and one free lubricant after each completed study visit. Every participant was asked to provide at least two different and current contact methods, and reminder calls were made before the follow-up day to verify that the exact time of the visit would be convenient for them. The study protocol and informed consent forms were approved by the Institutional Review Boards of the National Center for AIDS/STD Control and Prevention of the China Center for Disease Control and Prevention (Figure 1).

### Data ~~Collection-collection~~ and ~~Laboratory-laboratory Teststests~~

Questionnaire-based interviews were conducted on a one-on-one basis in a separate private room of the district clinic.

Data on demographics, sexual behavior and history of STDs were collected. Participants' questionnaires and blood specimens were linked through assignment of a unique identifier code in the follow-up visits.

Blood specimens were tested for HIV and syphilis infection. ~~The~~ HIV infection status was screened by an ELISA (InTec Products Company, Xiamen, China) screening; and confirmed by an HIV-1/2 Western Blot (HIV Blot 2.2 WBTM, Genelabs Diagnostics, Singapore). Syphilis infection was determined by a rapid plasma reagin (RPR) test (Shanghai Rongsheng, Shanghai, China); and confirmed using a Treponema pallidum particle assay (TPPA) test (Fujirebio Inc, Tokyo, Japan).

### Statistical ~~A~~analysis

Questionnaire data were double-entered and then checked for accuracy using EpiData software (The EpiData Association, Odense, Denmark, version 3.1). Data were analyzed using Stata/SE (StataCorp LP, USA, version 12.0 for Windows). HIV seroconversion was estimated to have occurred at the midpoint between the time of ~~the~~ baseline HIV test and the time of the follow-up HIV test with a seropositive result. Syphilis seroconversion was estimated to have occurred at the halfway point between the previous visit and the visit where seroconversion occurred. HIV/syphilis incidence density was calculated based on a Poisson distribution, with number of seroconversion incidents within the follow-up period as the numerator and person-years (PY) over the entire follow-up period as the denominator. Categorical factors associated with retention rate were analyzed by univariate logistic regression, including baseline demographic and behavioral characteristics. A stepwise multiple logistic regression (out 0.05, in 0.02) was used to select independent factors for the retention rate. A Cox regression model was used in univariate and multiple regression analyses to identify correlates of time to HIV seroconversion. Statistically significant variables in univariate analysis

( $P < 0.10$ ) were entered simultaneously into a multivariate Cox proportional hazard regression model to determine the adjusted hazard ratio (aHR) for HIV/syphilis seroconversion-related risk factors.

## RESULTS

### **Baseline Characteristics characteristics of the Participantsparticipants**

~~Of~~ Among 511 participants, the median age was 29 years; 94.32% belonged to the Han ethnic group; 64.77% were single, 22.90% were married or cohabiting, and 12.33% were separated or divorced or widowed. ~~For~~ In terms of education level, 73.19% had received a high school education or lower. About half (54.01%) had monthly incomes < 300US\$. Participants who identified themselves as exclusively homosexual or as bisexual accounted for 60.67% and 37.57%, respectively. A total of 16.05% and 44.03% of the participants thought it was impossible or improbable they would be infected with HIV, respectively. The median age of sexual debut was 20 years, and 58.71% experienced their sexual debut with a male. The median age of first anal intercourse was 22, and 58.65% of participants did not use a condom at first anal intercourse. In the past year, 78.67% of the participants had ever received condoms, 65.17% had ever received lubricant, 23.68% had ever taken part in peer education, 18.40% had ever received examination or treatment for STDs and 52.49% had ever received voluntary counseling and testing services (VCTs).

Regarding behaviors in the past six months among participants, the median number of male sex partners was three. For high risk behaviors, 327 (63.99%) had oral sex with male sex partners, 22 (6.73%) of them had consistent condom use with regular sex partners, and 26 (7.95%) with casual partners; 511 (100%) had anal sex with male sex partners, 13.11% of them had consistent condom use with regular sex partners, and 66 (18.70%) with casual partners. A total of 61 (11.94%) participants had ever engaged in commercial sexual behavior, among whom 35 (57.38%) had paid for sex and 43 (70.49%) had received money for sex. A total of 59 (11.55%) had ever engaged in group sex, which happened almost exclusively (96.61%) among males. A total of 166 (32.49%) had ever engaged in sex under the influence of

alcohol, among whom 152 (92.77%) had homosexual intercourse while intoxicated (Table 1).

**Table 1. Sociodemographic characteristics of the 547-511 study participants in the cohort of migrant MSM in Beijing**

| Variables                                      | n   | %     |
|------------------------------------------------|-----|-------|
| Overall, N                                     | 511 | 100   |
| Age (median, years)                            | 29  | -     |
| 18-24                                          | 149 | 29.16 |
| ≥25                                            | 362 | 70.84 |
| Ethnicity                                      |     |       |
| Han                                            | 482 | 94.32 |
| Minority                                       | 29  | 5.68  |
| Marital status                                 |     |       |
| Single                                         | 331 | 64.77 |
| Married                                        | 114 | 22.31 |
| Cohabiting with male or female sex partner     | 3   | 0.59  |
| Separated or divorced or widowed               | 63  | 12.33 |
| Duration of stay in Beijing                    |     |       |
| < 1 year                                       | 173 | 33.85 |
| ≥ 1 year                                       | 338 | 66.14 |
| Education level                                |     |       |
| High school and below                          | 374 | 73.19 |
| College and above                              | 137 | 26.81 |
| Monthly income (US\$)                          |     |       |
| < 300                                          | 276 | 54.01 |
| ≥ 300                                          | 235 | 45.99 |
| Self-reported sexual orientation               |     |       |
| Homosexual                                     | 310 | 60.67 |
| Heterosexual                                   | 8   | 1.57  |
| Bisexual                                       | 192 | 37.57 |
| Other                                          | 1   | 0.2   |
| Self-reported risk of HIV infection            |     |       |
| Impossible                                     | 82  | 16.05 |
| Improbable                                     | 225 | 44.03 |
| Possible                                       | 74  | 14.48 |
| Probable                                       | 15  | 2.94  |
| No idea                                        | 115 | 22.5  |
| Age of sexual debut (median, years)            | 20  |       |
| Gender of first sexual partner                 |     |       |
| Male                                           | 300 | 58.71 |
| Female                                         | 211 | 41.29 |
| Age of first anal intercourse (median, years)  | 22  |       |
| Had first anal intercourse before 15 years-old | 13  | 2.54  |



|    |                                                                                                        |     |       |
|----|--------------------------------------------------------------------------------------------------------|-----|-------|
| 1  |                                                                                                        |     |       |
| 2  | Number of male sex partners in the last 6 months (median)                                              | 3   |       |
| 3  | Number of female sex partners in the last 6 months (median)                                            | 0   |       |
| 4  | Oral sex with regular partners with consistent condom use in the past 6 months                         | 22  | 6.73  |
| 5  | Oral sex with casual partners with consistent condom use in the past 6 months                          | 26  | 7.95  |
| 6  | Anal sex with regular partners with consistent condom use in the past 6 months                         | 67  | 13.11 |
| 7  | Anal sex with casual partners with consistent condom use in the past 6 months                          | 66  | 18.7  |
| 8  | Ever had commercial sexual behavior                                                                    | 61  | 11.94 |
| 9  | Ever had group sex                                                                                     | 59  | 11.55 |
| 10 | Alcohol use prior to sex                                                                               | 166 | 32.49 |
| 11 | Ever had <a href="#">sexually transmitted diseases (STDs)</a> <a href="#">STDs</a>                     | 84  | 16.44 |
| 12 | Have ever received condoms                                                                             | 402 | 78.67 |
| 13 | Have ever received lubricant                                                                           | 333 | 65.17 |
| 14 | Have ever received peer education                                                                      | 121 | 23.68 |
| 15 | Have ever received examination or treatment for STD                                                    | 94  | 18.4  |
| 16 | Have ever received <a href="#">voluntary counseling and testing (VCT)</a> <a href="#">VCT</a> services | 268 | 52.45 |
| 17 | Have ever received educational materials on AIDS/STD                                                   | 302 | 59.1  |
| 18 | <hr/>                                                                                                  |     |       |
| 19 | MSM, men who have sex with men; STD, sexually transmitted disease.                                     |     |       |
| 20 |                                                                                                        |     |       |
| 21 |                                                                                                        |     |       |
| 22 |                                                                                                        |     |       |
| 23 |                                                                                                        |     |       |
| 24 |                                                                                                        |     |       |
| 25 |                                                                                                        |     |       |
| 26 |                                                                                                        |     |       |
| 27 |                                                                                                        |     |       |
| 28 |                                                                                                        |     |       |
| 29 |                                                                                                        |     |       |
| 30 |                                                                                                        |     |       |
| 31 |                                                                                                        |     |       |
| 32 |                                                                                                        |     |       |
| 33 |                                                                                                        |     |       |
| 34 |                                                                                                        |     |       |
| 35 |                                                                                                        |     |       |
| 36 |                                                                                                        |     |       |
| 37 |                                                                                                        |     |       |
| 38 |                                                                                                        |     |       |
| 39 |                                                                                                        |     |       |
| 40 |                                                                                                        |     |       |
| 41 |                                                                                                        |     |       |
| 42 |                                                                                                        |     |       |
| 43 |                                                                                                        |     |       |
| 44 |                                                                                                        |     |       |
| 45 |                                                                                                        |     |       |
| 46 |                                                                                                        |     |       |
| 47 |                                                                                                        |     |       |
| 48 |                                                                                                        |     |       |
| 49 |                                                                                                        |     |       |
| 50 |                                                                                                        |     |       |
| 51 |                                                                                                        |     |       |
| 52 |                                                                                                        |     |       |
| 53 |                                                                                                        |     |       |
| 54 |                                                                                                        |     |       |
| 55 |                                                                                                        |     |       |
| 56 |                                                                                                        |     |       |
| 57 |                                                                                                        |     |       |
| 58 |                                                                                                        |     |       |
| 59 |                                                                                                        |     |       |
| 60 |                                                                                                        |     |       |

### Incidence of infections of HIV, syphilis, HIV-syphilis co-infection and factors predicting HIV and syphilis seroconversion

During the eight-month follow-up, 16 HIV seroconversions were observed over 204.27 person-years of observation, resulting in an incidence rate of 7.83 per 100 person-years (PY) (95% CI 4.48 to 12.72). At the four-month visit, the incidence of HIV was 8.33 per 100 PY (95% CI 3.81 to 15.81) and at the eight-month visit it was 3.83 per 100 PY (95% CI 1.54 to 7.89). During the eight-month follow-up period, syphilis incidence was 11.11 per 100 PY (95% CI 6.47 to 17.80). At the four-month and eight-month visits, the syphilis incidence was 10.03 per 100 PY (95% CI 4.33 to 19.76) and 15.25 per 100 PY (95% CI 6.97 to 28.94), respectively. Six HIV ~~seroconversions~~ seroconversion cases were observed becoming syphilis-positive over 52.10 person-years, resulting in an incidence of co-infection of 11.52 per 100 PY (4.23 to 25.07).

Multivariate Cox regression analysis indicated that age  $\leq$  15 years old at first anal intercourse (adjusted hazard ratio (aHR) = 9.20, 95% CI 1.94 to 43.56, p=0.050) and ever had group sex (aHR=4.30, 95% CI 1.40 to 13.18, p=0.011) were significantly associated with time to HIV seroconversion (Table 2). For syphilis incidence, bisexual orientation

(aHR=5.09, 95% CI 1.02 to 25.57, p=0.048), and had more than one sex partners ~~in the last 6 months~~ since last investigation (aHR=9.22, 95% CI 1.13 to 73.37, p=0.038) ~~was~~ were significantly identified as risk factors (Table 3).

**Table 2—2. Multivariate analyses of participant characteristics associated with incident HIV infection among migrant MSM in Beijing**

| Factors                                                                                                               | No. of HIV seroconversions | Cumulative PY | HIV incidence (/100PY) | Univariate          |         | Multivariate         |         |
|-----------------------------------------------------------------------------------------------------------------------|----------------------------|---------------|------------------------|---------------------|---------|----------------------|---------|
|                                                                                                                       |                            |               |                        | HR (95% CI)         | p Value | Adjusted HR (95% CI) | p Value |
| Total                                                                                                                 | 16                         | 204.27        | 7.83                   |                     |         |                      |         |
| Education                                                                                                             |                            |               |                        |                     |         |                      |         |
| Junior college and below                                                                                              | 13                         | 143.95        | 9.03                   | 1.00                |         |                      |         |
| Above junior college                                                                                                  | 3                          | 60.32         | 4.97                   | 0.56(0.16 to 1.98)  | 0.370   |                      |         |
| Seeking partner through Internet                                                                                      |                            |               |                        |                     |         |                      |         |
| NO                                                                                                                    | 12                         | 109.45        | 10.96                  | 1.00                |         |                      |         |
| YES                                                                                                                   | 4                          | 94.81         | 4.22                   | 0.39(0.12 to 1.20)  | 0.100   |                      |         |
| Age of first anal intercourse (median, years; median, years)                                                          |                            |               |                        |                     |         |                      |         |
| ≥15                                                                                                                   | 14                         | 200.99        | 6.97                   | 1.00                |         | 1.00                 |         |
| <15                                                                                                                   | 2                          | 3.28          | 60.98                  | 8.28(1.88 to 36.46) | 0.005   | 9.20(1.94 to 43.56)  | 0.005   |
| Ever had group sex                                                                                                    |                            |               |                        |                     |         |                      |         |
| NO                                                                                                                    | 11                         | 183.48        | 6                      | 1.00                |         | 1.00                 |         |
| YES                                                                                                                   | 5                          | 20.78         | 24.06                  | 3.95(1.37 to 11.38) | 0.011   | 4.30(1.40 to 13.18)  | 0.011   |
| Knowledge of HIV/AIDS was acquired from                                                                               |                            |               |                        |                     |         |                      |         |
| Media                                                                                                                 |                            |               |                        |                     |         |                      |         |
| NO                                                                                                                    | 12                         | 109.65        | 10.94                  | 1.00                |         |                      |         |
| YES                                                                                                                   | 4                          | 94.62         | 4.23                   | 0.39(0.12 to 1.20)  | 0.100   |                      |         |
| Internet                                                                                                              |                            |               |                        |                     |         |                      |         |
| NO                                                                                                                    | 6                          | 108.59        | 5.53                   | 1.00                |         |                      |         |
| YES                                                                                                                   | 10                         | 95.68         | 10.45                  | 0.38(0.12 to 1.19)  | 0.097   |                      |         |
| Consistent condom use during oral sex with regular partners <del>in the past 6 months</del> since last investigations |                            |               |                        |                     |         |                      |         |
| NO                                                                                                                    | 1                          | 9.45          |                        | 1.00                |         |                      |         |
| YES                                                                                                                   | 15                         | 194.82        |                        | 0.73(0.10 to 5.50)  | 0.758   |                      |         |
| Consistent condom use during oral sex with casual partners <del>since last investigation</del> in the past 6 months   |                            |               |                        |                     |         |                      |         |
| NO                                                                                                                    | 0                          | 7.70          | 0                      | 1.00                |         |                      |         |
| YES                                                                                                                   | 9                          | 128.67        | 6.99                   | -                   | -       |                      |         |
| Consistent condom use during anal sex with regular partners <del>since last investigation</del> in the past 6 months  |                            |               |                        |                     |         |                      |         |
| NO                                                                                                                    | 3                          | 29.18         | 10.28                  | 1.00                |         |                      |         |
| YES                                                                                                                   | 13                         | 175.09        | 7.42                   | 0.72(0.21 to 2.53)  | 0.609   |                      |         |
| Consistent condom use during anal sex with casual partners <del>since last investigation</del> in the past 6 months   |                            |               |                        |                     |         |                      |         |
| NO                                                                                                                    | 2                          | 27.56         | 7.26                   | 1.00                |         |                      |         |
| YES                                                                                                                   | 10                         | 115.99        | 8.62                   | 1.19(0.26 to 5.42)  | 0.825   |                      |         |

PY, person-years; HR, hazard ratio.

**Table 3—3. Multivariate analyses of participant characteristics associated with incident syphilis infection among migrant MSM in Beijing**

| Factors                                                                                 | No. of syphilis seroconversions | Cumulative PY | Syphilis incidence (/100PY) | Univariate          |         | Multivariate         |         |
|-----------------------------------------------------------------------------------------|---------------------------------|---------------|-----------------------------|---------------------|---------|----------------------|---------|
|                                                                                         |                                 |               |                             | HR (95% CI)         | p Value | Adjusted HR (95% CI) | p Value |
| Total                                                                                   | 17                              | 152.95        | 11.11                       |                     |         |                      |         |
| <u>Self-reported sexual orientation</u> Ever had female sex partner(s)                  |                                 |               |                             |                     |         |                      |         |
| Homosexual/No                                                                           | 9                               | 96.89         | 9.29                        | 1.00                |         |                      |         |
| Heterosexual                                                                            | 0                               | 1.42          | 0                           | -                   |         |                      |         |
| Bisexual/Yes                                                                            | 8                               | 54.64         | 14.64                       | 5.56(1.10 to 27.05) | 0.038   | 5.09(1.02 to 25.57)  | 0.048   |
| Other                                                                                   | 0                               | 0             | -                           | -                   |         |                      |         |
| <u>Number of female sex partners since last investigation in the last 6 months</u>      |                                 |               |                             |                     |         |                      |         |
| ≤1                                                                                      | 16                              | 149.9         | 10.67                       | 1.00                |         |                      |         |
| ≥2                                                                                      | 1                               | 3.05          | 32.79                       | 9.22(1.13 to 75.37) | 0.038   |                      |         |
| <u>Seeking partners in bar/dancing hall/tearoom/chamber</u>                             |                                 |               |                             |                     |         |                      |         |
| NO                                                                                      | 11                              | 129.41        | 8.5                         | 1.00                |         |                      |         |
| YES                                                                                     | 6                               | 23.55         | 25.48                       | 3.12(0.75 to 13.07) | 0.119   |                      |         |
| <u>Consistent condom use during oral sex with regular partners in the past 6 months</u> |                                 |               |                             |                     |         |                      |         |
| NO                                                                                      | 1                               | 6.24          | 16.03                       | 1.00                |         |                      |         |
| YES                                                                                     | 16                              | 146.71        | 10.91                       | 0.24(0.03 to 1.99)  | 0.188   |                      |         |
| <u>Consistent condom use during oral sex with casual partners in the past 6 months</u>  |                                 |               |                             |                     |         |                      |         |
| NO                                                                                      | 0                               | 4.37          | 0                           | 1.00                |         |                      |         |
| YES                                                                                     | 8                               | 92.58         | 8.64                        | -                   |         |                      |         |
| <u>Consistent condom use during anal sex with regular partners in the past 6 months</u> |                                 |               |                             |                     |         |                      |         |
| NO                                                                                      | 2                               | 24.52         | 8.16                        | 1.00                |         |                      |         |
| YES                                                                                     | 15                              | 128.43        | 11.68                       | 0.57(0.11 to 2.80)  | 0.485   |                      |         |
| <u>Consistent condom use during anal sex with casual partners in the past 6 months</u>  |                                 |               |                             |                     |         |                      |         |
| NO                                                                                      | 0                               | 19.80         | 0                           | 1.00                |         |                      |         |
| YES                                                                                     | 11                              | 83.21         | 13.22                       | -                   |         |                      |         |

### Predictors of cohort retention

Of the 511 participants, 60.3% (308) were retained in the cohort at the four-month follow-up and 54.6% (274) were retained at the eight-month follow-up.

Univariate factors among baseline characteristics which were significantly associated with four-month retention were analysed with stepwise multiple logistic regression. Four factors were kept in the final model, including age > 25 years

old (adjusted odds ratio (AOR) = 1.81, 95% CI 1.07 to 3.06,  $p = 0.026$ ), living in Beijing for more than one year (AOR = 3.68, 95% CI 2.04 to 6.64,  $p < 0.001$ ), had at least one female sex partners ~~since last investigation in the last six months~~ (AOR = 0.48, 95% CI 0.29 to 0.80,  $p=0.005$ ), and had ever received VCTs in the past 12 months (AOR =1.71, 95% CI 1.07 to 2.72,  $p<0.024$ ) (Table 4).

**Table 4—4. Factors associated with four-month retention rate in a cohort study of migrant MSM in Beijing, China, using stepwise multiple logistic analysis**

| Factor                                                                                            | N   | Retention rate % (n) | OR (95% CI)        | p Value | Adjusted OR (95% CI) | p Value |
|---------------------------------------------------------------------------------------------------|-----|----------------------|--------------------|---------|----------------------|---------|
| Age                                                                                               |     |                      |                    |         |                      |         |
| 18-24                                                                                             | 149 | 46.98(70)            | 1.00               |         | 1.00                 |         |
| ≥25                                                                                               | 362 | 65.75(238)           | 2.17(1.47 to 3.19) | <0.001  | 1.81(1.07 to 3.06)   | 0.026   |
| Duration of stay in Beijing                                                                       |     |                      |                    |         |                      |         |
| < 1 year                                                                                          | 95  | 34.74(33)            | 1.00               |         | 1.00                 |         |
| ≥ 1 year                                                                                          | 416 | 66.27(208)           | 3.66(2.29 to 5.85) | <0.001  | 3.68 (2.04 to 6.64)  | <0.001  |
| Number of female sex partners <del>since last investigation in the last 6 months</del>            |     |                      |                    |         |                      |         |
| 0                                                                                                 | 382 | 64.66 (247)          | 1.00               |         | 1.00                 |         |
| ≥1                                                                                                | 129 | 47.29 (61)           | 0.49(0.33 to 0.74) | 0.001   | 0.48(0.29 to 0.80)   | 0.005   |
| Have received <del>voluntary counseling and testing (VCT)</del> VCT service in the past 12 months |     |                      |                    |         |                      |         |
| No                                                                                                | 243 | 51.85 (126)          | 1.00               |         | 1.00                 |         |
| Yes                                                                                               | 268 | 67.91 (182)          | 1.97(1.37 to 2.81) | <0.001  | 1.71(1.07 to 2.72)   | 0.024   |

For eight-month retention, age > 25 years old (AOR = 1.76, 95% CI 1.16 to 2.68,  $p = 0.008$ ), living in Beijing for more than one year (AOR = 1.68, 95% CI 1.03 to 2.73,  $p = 0.039$ ), first sexual partner was female (AOR = 0.60, 95% CI 0.41 to 0.88,  $p = 0.009$ ), ever had group sex (AOR = 0.50, 95% CI 0.28 to 0.89,  $p = 0.019$ ), and had received lubricant in the past 12 months (AOR = 2.31, 95% CI 1.56 to 3.42,  $p < 0.001$ ) were retained in the final model using stepwise multiple logistic regression analysis (Table 5).

**Table 5—5. Factors associated with eight-month retention rate in a cohort study of migrant MSM in Beijing, China, using stepwise multiple logistic analysis**

| Factor | N | Retention rate % (n) | OR (95% CI) | p Value | Adjusted OR (95% CI) | p Value |
|--------|---|----------------------|-------------|---------|----------------------|---------|
|--------|---|----------------------|-------------|---------|----------------------|---------|

|                                               |     |             |                    |        |                     |        |  |
|-----------------------------------------------|-----|-------------|--------------------|--------|---------------------|--------|--|
| Age                                           |     |             |                    |        |                     |        |  |
| 18-24                                         | 149 | 44.30(66)   | 1.00               |        | 1.00                |        |  |
| ≥25                                           | 362 | 57.18(207)  | 1.68(1.14 to 2.47) | 0.008  | 1.76(1.16 to 2.68)  | 0.008  |  |
| Duration of stay in Beijing                   |     |             |                    |        |                     |        |  |
| < 1 year                                      | 78  | 48.72 (38)  | 1.00               |        | 1.00                |        |  |
| > 1 year                                      | 338 | 58.88 (199) | 2.17(1.37 to 3.43) | <0.001 | 1.68 (1.03 to 2.73) | 0.039  |  |
| Gender of the first sexual partner            |     |             |                    |        |                     |        |  |
| Male                                          | 300 | 58.33 (175) | 1.00               |        | 1.00                |        |  |
| Female                                        | 211 | 46.45 (98)  | 0.62(0.43 to 0.88) | 0.008  | 0.60 (0.41 to 0.88) | 0.009  |  |
| Ever had group sex                            |     |             |                    |        |                     |        |  |
| NO                                            | 452 | 54.87 (248) | 1.00               |        | 1.00                |        |  |
| YES                                           | 59  | 42.37 (25)  | 0.61(0.35 to 1.05) | 0.072  | 0.50 (0.28 to 0.89) | 0.019  |  |
| Have received lubricant in the past 12 months |     |             |                    |        |                     |        |  |
| NO                                            | 109 | 34.86 (38)  | 1.00               |        | 1.00                |        |  |
| YES                                           | 402 | 58.46 (235) | 2.59(1.78 to 3.77) | <0.001 | 2.31 (1.56 to 3.42) | <0.001 |  |

## DISCUSSION

Our study found that the prevalence of HIV (6.58%) among migrant MSM was at a highly epidemic level, which was ~~highlighted-remarkable in comparison~~ compared to that of a previous study among ~~the general~~ migrant ~~general~~ population (0%) in Beijing.<sup>23</sup> Additionally, it was higher than the 4.8% in 2007 among general MSM in Beijing.<sup>24</sup> A similar result (5.9%) was found in a recent cross-sectional study among migrant MSM.<sup>23</sup> Incidence in this subgroup (7.83/100PY) was consistent with that of migrant MSM (8.51/100PY) in a MSM cohort study in Beijing, and higher than the incidence of permanent resident MSM.<sup>25</sup> It was also higher than the incidence of general MSM in different parts of China.<sup>6, 7</sup>

The study found that participants whose first anal intercourse occurred before age 15 had significantly higher risk for HIV seroconversion. An American study of young minority MSM found that study participants who had an MSM sexual debut before 16 years old were more likely to have psychological problems and high risk behaviors like exchanging sex and drug use.<sup>26</sup> Early sexual debut could have a deep and long-term influence on ~~an~~ individual's ~~ss'~~ ~~developing attitudes towards~~ sexual ~~concept~~, but appropriate sex education has generally been shunned in traditional

1  
2 Chinese education. Our study indicated that early sex education should be combined with Chinese characteristics, and  
3  
4 relevant measures need to be implemented as soon as possible. Another risk factor significantly associated with HIV  
5  
6 incidence was ever had group sex. An explanation of this observation is that psychological stress caused by stigma and  
7  
8 discrimination hinders the development of longer-term relationships between MSM,<sup>27</sup> and having sex with multiple  
9  
10 partners increases the chance of HIV transmission. This indicates a need for confidentiality and supportive services for  
11  
12 migrant MSM. Serious attention should also be paid to the prevalence of STDs. The prevalence rate of syphilis (29.62%)  
13  
14 was higher than ~~those of~~in previous studies conducted among MSM in Beijing, such as 19.8% in 2007,<sup>24</sup> and 22.0% in  
15  
16 2009.<sup>10</sup> The incidence of syphilis (11.11/100PY) was also ~~at an~~ extremely high ~~level~~ compared to 8.06/100PY in a  
17  
18 cohort study among MSM during the same period in 2009.<sup>25</sup> High prevalence of syphilis among MSM ~~was~~ is a  
19  
20 common risk factor for encouraging HIV infection because of the biological and behavioral links between syphilis and  
21  
22 HIV.<sup>28</sup>

23  
24  
25 The multiple regression analysis significantly revealed that self-identified bisexuals were five times more likely than  
26  
27 homosexuals to be infected with syphilis. One major reason for this outcome could be that ~~bisexuals-MSM who had had~~  
28  
29 sex with females may have more varied sexual behaviors with a wider range of sexual partners, including males and  
30  
31 females. In addition, a cross-sectional study among young migrant MSM in Beijing discovered that MSM who were  
32  
33 engaged in bisexual behavior had a higher rate of unprotected sex with stable female partners and were less likely to  
34  
35 take part in ~~prevention-preventive~~ behaviors,<sup>18</sup> which was consistent with our finding that those who had at least one  
36  
37 female sex partner and those whose first sexual partner was female were significantly more likely to be lost at  
38  
39 four-month and eight-month follow-up visits, respectively. MSM face strong social pressure and stigma in China,  
40  
41 which may lead them to hide their sexual orientation by unwillingly engaging in heterosexual relationships; thus, many  
42  
43 Chinese MSM will potentially enter a heterosexual marriage due to social and familial pressure.<sup>4</sup> Concerned about  
44  
45 disclosing their MSM behavior to their female partners, bisexual MSM may be more reluctant to be followed up. Also,  
46  
47  
48  
49  
50  
51  
52  
53  
54  
55  
56  
57  
58  
59  
60

1  
2  
3 ~~bisexual~~ MSM ~~who have~~ with female partners are more likely to be engaged in risk behaviors, such as having  
4  
5 unprotected sex to ~~indicate~~ demonstrate loyalty to their female partners and having commercial or casual sex with men.

6  
7  
8 Moreover, only 18.4% of the participants reported having received an examination or treatment for sexually transmitted  
9  
10 diseases in the past 12 months, which may be related to the high cost of health services and low coverage of health  
11  
12 insurance for the migrant population.<sup>18</sup> Low risk-awareness might be another reason for their lower access to HIV/STD  
13  
14 test and treatment. All of these emphasize an urgent need for widespread and accurate syphilis screening and affordable  
15  
16 treatment for migrant MSM in Beijing.

17  
18  
19  
20 In our study, the retention rate was lower than ~~in~~ previous cohort studies implemented among general MSM in Beijing  
21  
22 (86.2% in 2007, 86.8% in 2009).<sup>25,26</sup> From the multiple regression analysis, participants who were less than 25 years  
23  
24 old were more likely to be lost at both four-month and eight-month follow-up visits. Similar problems have occurred  
25  
26 among studies of young MSM in the US.<sup>29</sup> A plausible reason for this observation was that many young people in China  
27  
28 have poor knowledge of safe sexual behaviors. Traditional interventions are more pragmatic but less attractive and  
29  
30 appropriate for young people. A qualitative investigation implemented among young MSM in Milwaukee and Detroit  
31  
32 offered some new approaches, such as embedd combining HIV/AIDS prevention care efforts intervention in with the  
33  
34 context of broader their daily life lives and helping solve problems of social relationships issues facing bothering young  
35  
36 MSM.<sup>30</sup> However, as Chinese young MSM are almost certainly different withfrom American's in some aspects. As  
37  
38 differences almost certainly exist between young Chinese and American MSM, predictors measures of retention  
39  
40 intervention among young MSM in Beijing deserve further investigation.

41  
42  
43  
44  
45  
46  
47  
48 As for positive predictors, we found those who had been in Beijing for more than one year or who had received  
49  
50 lubricant were more likely to be maintained in this cohort at both four-month and eight-month follow-up visits. As these  
51  
52 services are provided by local communities, we found similar results as those in Yangzhou.<sup>8</sup> Migrant MSM who stay  
53  
54 longer in Beijing may have more chances to receive effective and stable intervention services, and the potential impact  
55  
56  
57  
58  
59  
60

1  
2 on their increasing awareness of self-protection might encourage them to pay closer attention to advances in research.

3  
4  
5 As a result, migrants may be more likely to remain with the investigation to show their support. However, the data

6  
7 showed that receiving ~~voluntary counseling and testing (VCT)~~ service in the past 12 months was a positive factor at

8  
9 the four-month follow-up visit, which was replaced by receiving lubricant at the eight-month visit. This indicates that

10  
11 factors associated with retention rate may change as time goes on. ~~In other words, different factors may have a unique~~

12  
13 ~~impact on retention rate in different periods~~, which implies that we should adjust methods for interventions over time so

14  
15 as to keep the entire cohort more stable. From the results of our study, the coverage of intervention on this population

16  
17 was limited. Aimed at the mobility problem inherent to migrant populations, a specific strategy of intervention targeted

18  
19 at migrant MSM is imminently needed.

20  
21 This study has a number of limitations. Firstly, retention rates were relatively low, which means that the estimates of

22  
23 HIV/syphilis seroconversions may be biased because no evidence showed a balance between participants retained in

24  
25 the study and those lost to follow-up. Secondly, using non-random sampling methods may have led to selection bias.

26  
27 Thirdly, the sample size was insufficient, and some potentially relevant factors may be concealed by the small sample

28  
29 size. Lastly, the study subjects were all inflow population and did not include outflow population, and the proportion of

30  
31 migrants from different provinces varied. There is no evidence to show the data could be generalized to other regions.

32  
33 To our knowledge, this is the first cohort study to assess incidence of HIV and syphilis among migrant MSM in Beijing.

34  
35 With highly prevalent risk behaviors, the migrant MSM had a high level of HIV incidence, and the epidemic of syphilis

36  
37 among this subgroup was extremely serious. Bisexual MSM were at a high risk of syphilis seroconversion, and were

38  
39 more concealed among migrant MSM. Future prevention efforts should include screening and appropriate treatment for

40  
41 syphilis. Multiple modes of intervention services need to be improved and implement for this marginalised group. For

42  
43 the sake of bisexual MSM's health, as well as for their partners', more attention need to be paid on female partners of

44  
45 bisexual MSM to encourage them to take test and be followed-up. A greater understanding of risk behaviors and the



1  
2  
3 HIV/STD epidemic among migrant MSM needs to be investigated in the future.  
4  
5  
6

7  
8 **ACKNOWLEDGEMENTS**  
9

10 This work was supported in part by Natural Science Foundation of China (81001288, 11171268), National S&T Major  
11 Project Foundation of China (No. 2012ZX10001-001 and No. 2011ZX10004-902), Priority Academic Program  
12 Development of Jiangsu Higher Education Institutions (PAPD).  
13  
14  
15

16  
17 The funders had no role in study design, data collection and analysis, decision to publish, or preparation of the  
18 manuscript.  
19  
20  
21  
22

23  
24  
25 **CONTRIBUTORS**  
26

27  
28 ZP, RY and NW conceived and designed the experiments, HL and LW performed the experiments, HM and WM  
29 analyzed the data, HZ and YZ contributed reagents/materials/analysis tools, HM, WM and ZP wrote the paper, and all  
30 authors read and approved the final version of the manuscript.  
31  
32  
33  
34  
35  
36  
37

38 **COMPETING INTERESTS**  
39

40 The authors have no conflict of interest to declare.  
41  
42  
43  
44

45 **Data sharing statement**  
46

47  
48 Extra data is available by emailing zhihangpeng@njmu.edu.cn.  
49  
50  
51  
52  
53  
54  
55  
56  
57  
58  
59  
60

## REFERENCES

1. Jia Z, Wang L, Chen R Y, *et al.* Tracking the evolution of HIV/AIDS in China from 1989–2009 to inform future prevention and control efforts. *PLoS One* 2011; **6**: e25671.
2. National Center for STD/AIDS Prevention and Control, Chinese Center for Disease Prevention and Control, *Epidemic of HIV/AIDS and sexual transmitted diseases and main progression on prevention in 2011, China.* Beijing: Chinese Center for Disease Control and Prevention, 2012.
3. Ministry of Health of the People’s Republic of China, UNAIDS, WHO. *National report for HIV/AIDS estimation in China, 2011.* Beijing: Chinese Center for Disease Control and Prevention, 2011.
4. Chow EPF, Lau JTF, Zhuang X, *et al.* HIV Prevalence Trends, Risky Behaviours, and Governmental and Community Responses to the Epidemic among Men Who Have Sex with Men in China. *BioMed research international* 2014;**2014**:607261.
5. Lu F, Fu J, Zhang R, *et al.* Analysis of HIV epidemic situation and immigrant population. *Infect Dis Info* 2006;**19**:259-61.
6. Xu J, An M, Han X, *et al.* Prospective cohort study of HIV incidence and molecular characteristics of HIV among men who have sex with men(MSM) in Yunnan Province, China. *BMC Infect Dis* 2013;**13**:3.
7. Xu J, Zhang M, Brown K, *et al.* Syphilis and HIV seroconversion among a 12-month prospective cohort of men who have sex with men in Shenyang, China. *Sex Transm Dis* 2010;**37**:432-9.
8. Peng Z, Yang H, Norris J, *et al.* HIV Incidence and Predictors Associated with Retention in a Cohort of Men Who have Sex with Men in Yangzhou, Jiangsu Province, China. *PloS One* 2012;**7**:e52731.
9. Yang H, Tang W, Xiao Z, *et al.* Worsening Epidemic of HIV and Syphilis Among Men Who Have Sex With Men in Jiangsu Province, China. *Clin Infect Dis* 2014;**58**:1753-9.
10. Fan S, Lu H, Ma X, *et al.* Behavioral and serologic survey of men who have sex with men in Beijing, China:

- 1  
2  
3 implication for HIV intervention. *AIDS Patient Care STDS* 2012;**26**:148-55.  
4  
5  
6 11. Feng L, Ding X, Lu R, *et al.* High HIV prevalence detected in 2006 and 2007 among men who have sex with men  
7  
8 in China's largest municipality: An alarming epidemic in Chongqing, China. *J Acquir Immune Defic Syndr*  
9  
10 2009;**52**:79-85.  
11  
12  
13 12. Berg CJ, Nehl EJ, Wong FY, *et al.* Prevalence and correlates of tobacco use among a sample of MSM in Shanghai,  
14  
15 China. *Nicotine Tob Res* 2011;**13**:22-8.  
16  
17  
18 13. Liu H, Yang H, Li X, *et al.* Men who have sex with men and human immunodeficiency virus/sexually transmitted  
19  
20 disease control in China. *Cell Res* 2005;**15**:858.  
21  
22  
23 14. Lau JT, Wang M, Wong HN, *et al.* Prevalence of bisexual behaviors among men who have sex with men (MSM)  
24  
25 in China and associations between condom use in MSM and heterosexual behaviors. *Sex Transm Dis*  
26  
27 2008;**35**:406-13.  
28  
29  
30 15. He N, Wong FY, Huang ZJ, *et al.* HIV risks among two types of male migrants in Shanghai, China: money boys vs.  
31  
32 general male migrants. *AIDS* 2007;**21**:S73-9.  
33  
34  
35 16. Yang X, Derlega VJ, Luo H. Migration, behaviour change and HIV/STD risks in China. *AIDS Care*  
36  
37 2007;**19**:282-8.  
38  
39  
40 17. Yang X. Temporary migration and HIV risk behaviors in China. *Environment and Planning A* 2006;**38**:1527.  
41  
42  
43 18. Peng Y, Chang W, Zhou H, *et al.* Factors associated with health-seeking behavior among migrant workers in  
44  
45 Beijing, China. *BMC Health Serv Res* 2010;**10**:69.  
46  
47  
48 19. Shi TX, Zhang BC, Li XF, *et al.* Study on the high risk behaviors related to AIDS among men who having sex  
49  
50 with men in the floating population. *Chin J Epidemiol* 2009;**30**:668.  
51  
52  
53 20. Newly reported HIV/AIDS cases increase 24.3% per year in Beijing. Retrieved from [http://](http://health.sina.com.cn/news/2013-11-29/0921114941.shtml)  
54  
55 [health.sina.com.cn/news/2013-11-29/0921114941.shtml](http://health.sina.com.cn/news/2013-11-29/0921114941.shtml) (accessed 31 May 2014).  
56  
57  
58  
59  
60

- 1  
2  
3 21. Wang B, Li X, Stanton B, *et al.* Socio-demographic and behavioral correlates for HIV and syphilis infections  
4 among migrant men who have sex with men in Beijing, China. *AIDS Care* 2013;**25**:249-57.  
5  
6
- 7 22. Guo Y, Li X, Song Y, *et al.* Bisexual behavior among Chinese young migrant men who have sex with men:  
8 implications for HIV prevention and intervention. *AIDS Care* 2012;**24**:451-8.  
9  
10
- 11 23. Xia DY, Lu HY, Liu GW, *et al.* Prevalence of HIV infection, syphilis, HCV and risk behaviors among migrant  
12 population in Beijing. *Chin J AIDS STD* 2011;**17**:430-3.  
13  
14
- 15 24. Ruan Y, Luo F, Jia Y, *et al.* Risk factors for syphilis and prevalence of HIV, hepatitis B and C among men who  
16 have sex with men in Beijing, China: implications for HIV prevention. *AIDS Behav* 2009;**13**:663-70.  
17  
18
- 19 25. Li D, Li S, Liu Y, *et al.* HIV incidence among men who have sex with men in Beijing: a prospective cohort study.  
20 *BMJ Open* 2012;**2**:e001829.  
21  
22
- 23 26. Outlaw AY, Phillips G, Hightow-Weidman LB, *et al.* Age of MSM sexual debut and risk factors: results from a  
24 multisite study of racial/ethnic minority YMSM living with HIV. *AIDS Patient Care STDS* 2011;**25**:S23-9.  
25  
26
- 27 27. Neilands TB, Steward WT, Choi KH. Assessment of stigma towards homosexuality in China: a study of men who  
28 have sex with men. *Arch Sex Behav* 2008;**37**:838-44.  
29  
30
- 31 28. Guo H, Wei JF, Yang H, *et al.* Rapidly increasing prevalence of HIV and syphilis and HIV-1 subtype  
32 characterization among men who have sex with men in Jiangsu, China. *Sex Transm Dis* 2009; **36**:120-125.  
33  
34
- 35 29. Galvin SR, Cohen MS. The role of sexually transmitted diseases in HIV transmission. *Nat Rev Microbiol*  
36 2004;**2**:33-42.  
37  
38
- 39 30. Hightow-Weidman LB, Jones K, Wohl AR, *et al.* Early linkage and retention in care: findings from the outreach,  
40 linkage, and retention in care initiative among young men of color who have sex with men. *AIDS Patient Care*  
41 *STDS* 2011;**25**:S31-8.  
42  
43  
44  
45  
46  
47  
48  
49  
50  
51  
52  
53  
54  
55  
56  
57  
58  
59  
60

1  
2  
3  
4  
5  
6  
7  
8  
9  
10  
11  
12  
13  
14  
15  
16  
17  
18  
19  
20  
21  
22  
23  
24  
25  
26  
27  
28  
29  
30  
31  
32  
33  
34  
35  
36  
37  
38  
39  
40  
41  
42  
43  
44  
45  
46  
47  
48  
49  
50  
51  
52  
53  
54  
55  
56  
57  
58  
59  
60

Figure legend:

Figure 1. Study flowchart of the migrant MSM cohort, with focus on ~~the~~HIV and syphilis incidence.

For peer review only

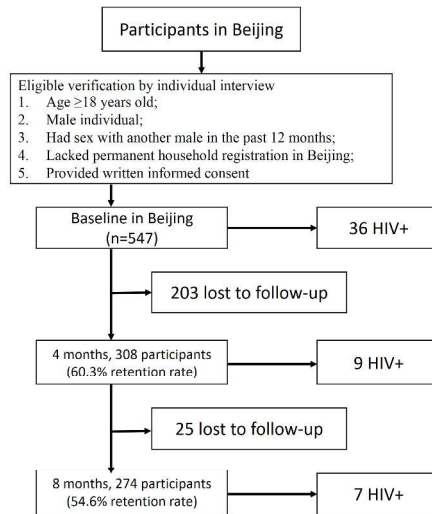

Figure 1. Study flowchart of the migrant MSM cohort, with focus on the HIV and syphilis incidence (N=547).

338x190mm (300 x 300 DPI)

review only

STROBE Statement—Checklist of items that should be included in reports of *cohort studies*

|                          | Item No | Recommendation                                                                                                                                                                                               | Reported on page # |
|--------------------------|---------|--------------------------------------------------------------------------------------------------------------------------------------------------------------------------------------------------------------|--------------------|
| Title and abstract       | 1       | (a) Indicate the study's design with a commonly used term in the title or the abstract                                                                                                                       | 1                  |
|                          |         | (b) Provide in the abstract an informative and balanced summary of what was done and what was found                                                                                                          | 1                  |
| <b>Introduction</b>      |         |                                                                                                                                                                                                              |                    |
| Background/rationale     | 2       | Explain the scientific background and rationale for the investigation being reported                                                                                                                         | 2                  |
| Objectives               | 3       | State specific objectives, including any prespecified hypotheses                                                                                                                                             | 3-4                |
| <b>Methods</b>           |         |                                                                                                                                                                                                              |                    |
| Study design             | 4       | Present key elements of study design early in the paper                                                                                                                                                      | 4-5                |
| Setting                  | 5       | Describe the setting, locations, and relevant dates, including periods of recruitment, exposure, follow-up, and data collection                                                                              | 4                  |
| Participants             | 6       | (a) Give the eligibility criteria, and the sources and methods of selection of participants. Describe methods of follow-up                                                                                   | 4                  |
|                          |         | (b) For matched studies, give matching criteria and number of exposed and unexposed                                                                                                                          | 4                  |
| Variables                | 7       | Clearly define all outcomes, exposures, predictors, potential confounders, and effect modifiers. Give diagnostic criteria, if applicable                                                                     | 4                  |
| Data sources/measurement | 8*      | For each variable of interest, give sources of data and details of methods of assessment (measurement). Describe comparability of assessment methods if there is more than one group                         | 4                  |
| Bias                     | 9       | Describe any efforts to address potential sources of bias                                                                                                                                                    | 5                  |
| Study size               | 10      | Explain how the study size was arrived at                                                                                                                                                                    | 4-5                |
| Quantitative variables   | 11      | Explain how quantitative variables were handled in the analyses. If applicable, describe which groupings were chosen and why                                                                                 | 4-5                |
| Statistical methods      | 12      | (a) Describe all statistical methods, including those used to control for confounding                                                                                                                        | 6                  |
|                          |         | (b) Describe any methods used to examine subgroups and interactions                                                                                                                                          | 6                  |
|                          |         | (c) Explain how missing data were addressed                                                                                                                                                                  |                    |
|                          |         | (d) If applicable, explain how loss to follow-up was addressed                                                                                                                                               |                    |
|                          |         | (e) Describe any sensitivity analyses                                                                                                                                                                        | 6                  |
| <b>Results</b>           |         |                                                                                                                                                                                                              |                    |
| Participants             | 13*     | (a) Report numbers of individuals at each stage of study—eg numbers potentially eligible, examined for eligibility, confirmed eligible, included in the study, completing follow-up, and analysed            | 7                  |
|                          |         | (b) Give reasons for non-participation at each stage                                                                                                                                                         |                    |
|                          |         | (c) Consider use of a flow diagram                                                                                                                                                                           | 5                  |
| Descriptive data         | 14*     | (a) Give characteristics of study participants (eg demographic, clinical, social) and information on exposures and potential confounders                                                                     | 7-9                |
|                          |         | (b) Indicate number of participants with missing data for each variable of interest                                                                                                                          | 7                  |
|                          |         | (c) Summarise follow-up time (eg, average and total amount)                                                                                                                                                  | 10                 |
| Outcome data             | 15*     | Report numbers of outcome events or summary measures over time                                                                                                                                               | 9                  |
| Main results             | 16      | (a) Give unadjusted estimates and, if applicable, confounder-adjusted estimates and their precision (eg, 95% confidence interval). Make clear which confounders were adjusted for and why they were included | 9-11               |

|                          |    |                                                                                                                                                                            |       |
|--------------------------|----|----------------------------------------------------------------------------------------------------------------------------------------------------------------------------|-------|
|                          |    | (b) Report category boundaries when continuous variables were categorized                                                                                                  |       |
|                          |    | (c) If relevant, consider translating estimates of relative risk into absolute risk for a meaningful time period                                                           |       |
| Other analyses           | 17 | Report other analyses done—eg analyses of subgroups and interactions, and sensitivity analyses                                                                             | 11-12 |
| <b>Discussion</b>        |    |                                                                                                                                                                            |       |
| Key results              | 18 | Summarise key results with reference to study objectives                                                                                                                   | 13-14 |
| Limitations              | 19 | Discuss limitations of the study, taking into account sources of potential bias or imprecision. Discuss both direction and magnitude of any potential bias                 | 15    |
| Interpretation           | 20 | Give a cautious overall interpretation of results considering objectives, limitations, multiplicity of analyses, results from similar studies, and other relevant evidence | 16    |
| Generalisability         | 21 | Discuss the generalisability (external validity) of the study results                                                                                                      | 15    |
| <b>Other information</b> |    |                                                                                                                                                                            |       |
| Funding                  | 22 | Give the source of funding and the role of the funders for the present study and, if applicable, for the original study on which the present article is based              | 16    |

\*Give information separately for exposed and unexposed groups.

**Note:** An Explanation and Elaboration article discusses each checklist item and gives methodological background and published examples of transparent reporting. The STROBE checklist is best used in conjunction with this article (freely available on the Web sites of PLoS Medicine at <http://www.plosmedicine.org/>, Annals of Internal Medicine at <http://www.annals.org/>, and Epidemiology at <http://www.epidem.com/>). Information on the STROBE Initiative is available at <http://www.strobe-statement.org>.
